# Supplementary material
Source: MDPI journal article supplement (https://www.mdpi.com/2073-4344/11/9/1071)
Supplement: s1 [file s1]

## Supplementary Materials

### ***N*-Directed Pd-Catalyzed Photoredox-Mediated C-H Arylation for Accessing Phenyl-Extended Analogues of Biginelli/Suzuki-Derived Ethyl 4-Methyl-2,6-Diphenylpyrimidine-5-Carboxylates**

Savvas N. Georgiades,\* Persefoni G. Nicolaou, Nikos Panagiotou

Department of Chemistry, University of Cyprus

E-mail: georgiades.savvas@ucy.ac.cy

#### **Table of Contents:**

|                                                                                     |     |
|-------------------------------------------------------------------------------------|-----|
| • <sup>1</sup> H NMR and <sup>13</sup> C NMR Spectra of Isolated Products           | S2  |
| • <sup>1</sup> H - <sup>1</sup> H COSY and NOESY NMR Spectra of Compound <b>10r</b> | S53 |
| • Single Crystal X-ray Crystallography Procedures                                   | S54 |
| • Crystallographic Data of Compound <b>10a</b>                                      | S55 |

# <sup>1</sup>H NMR and <sup>13</sup>C NMR Spectra of Isolated Products

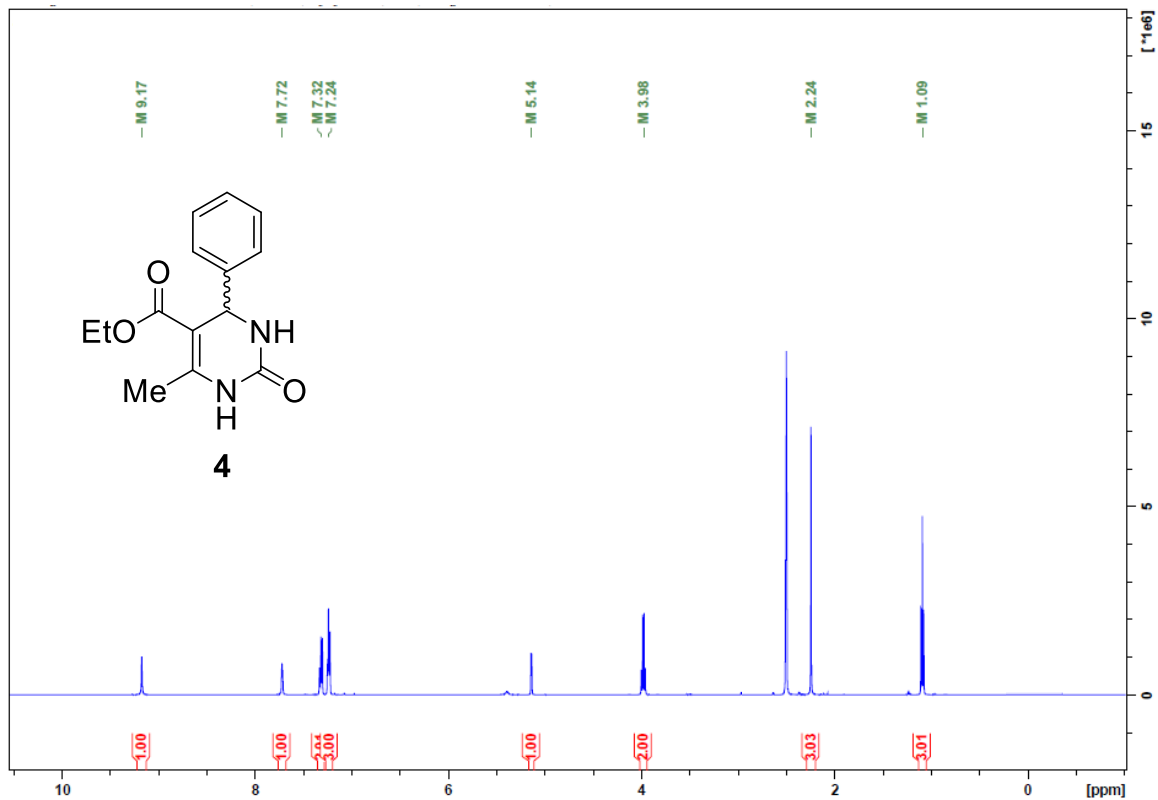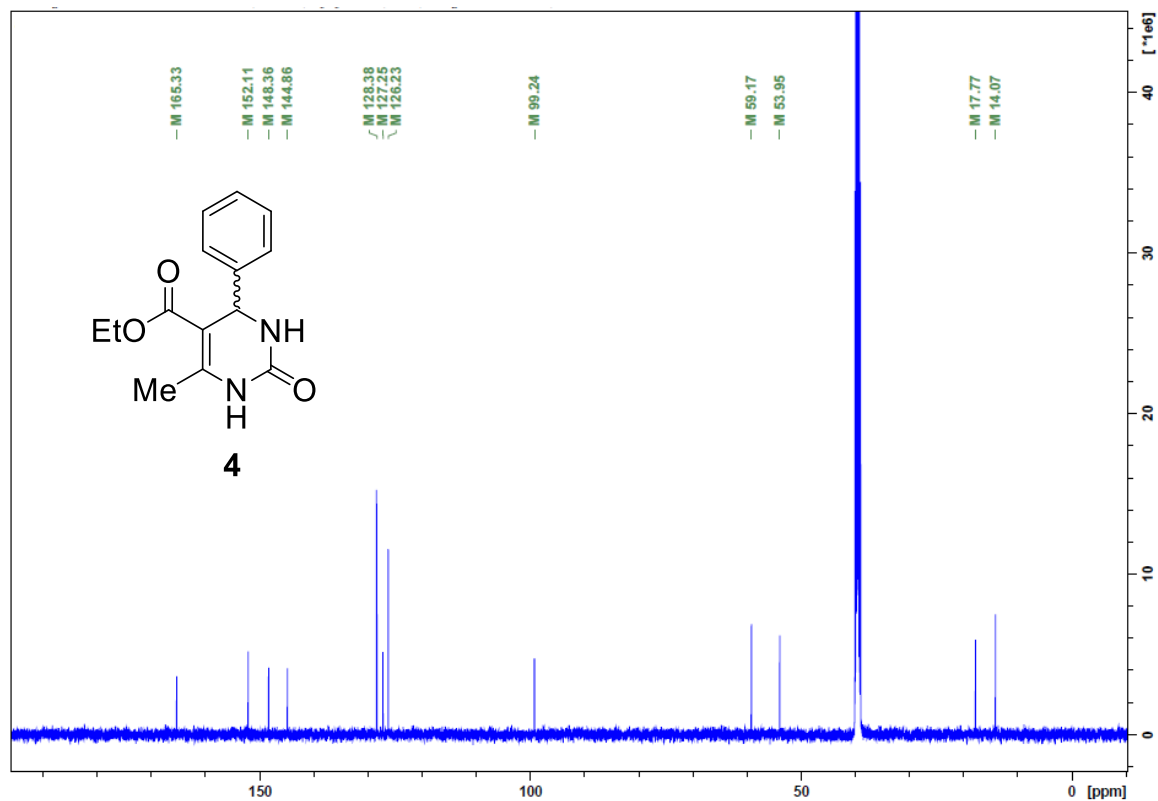

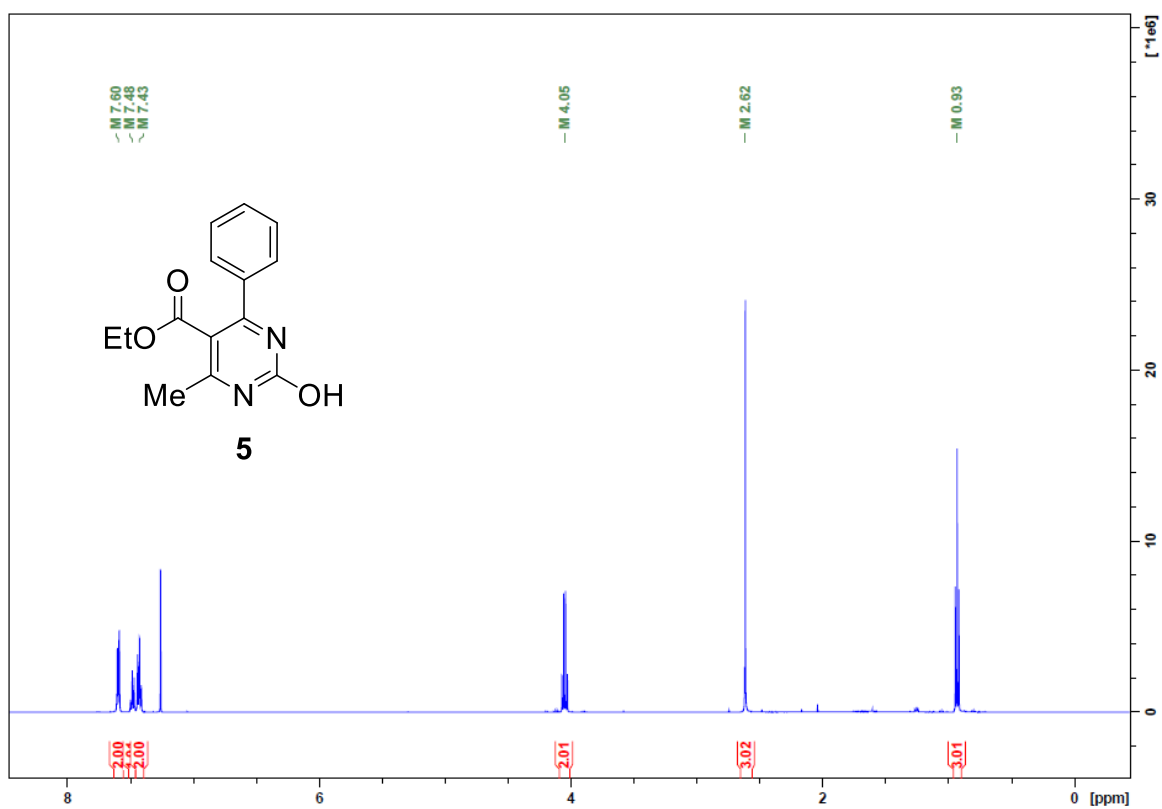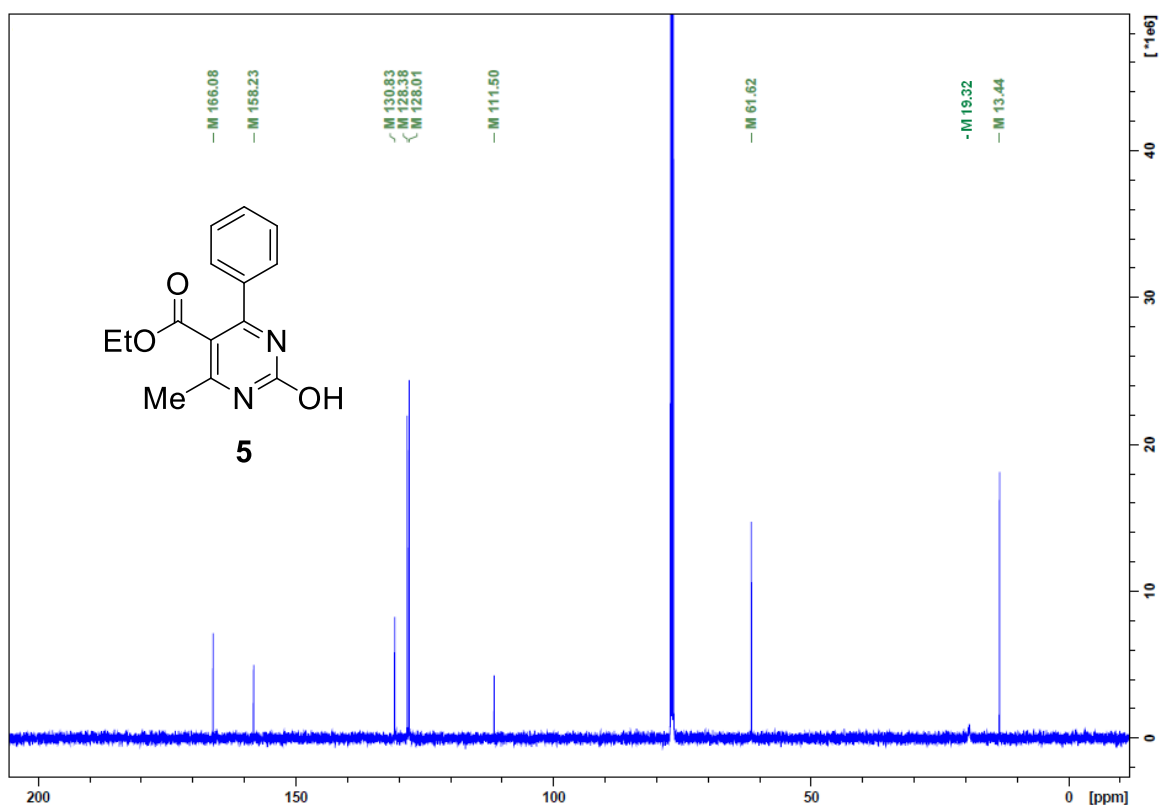

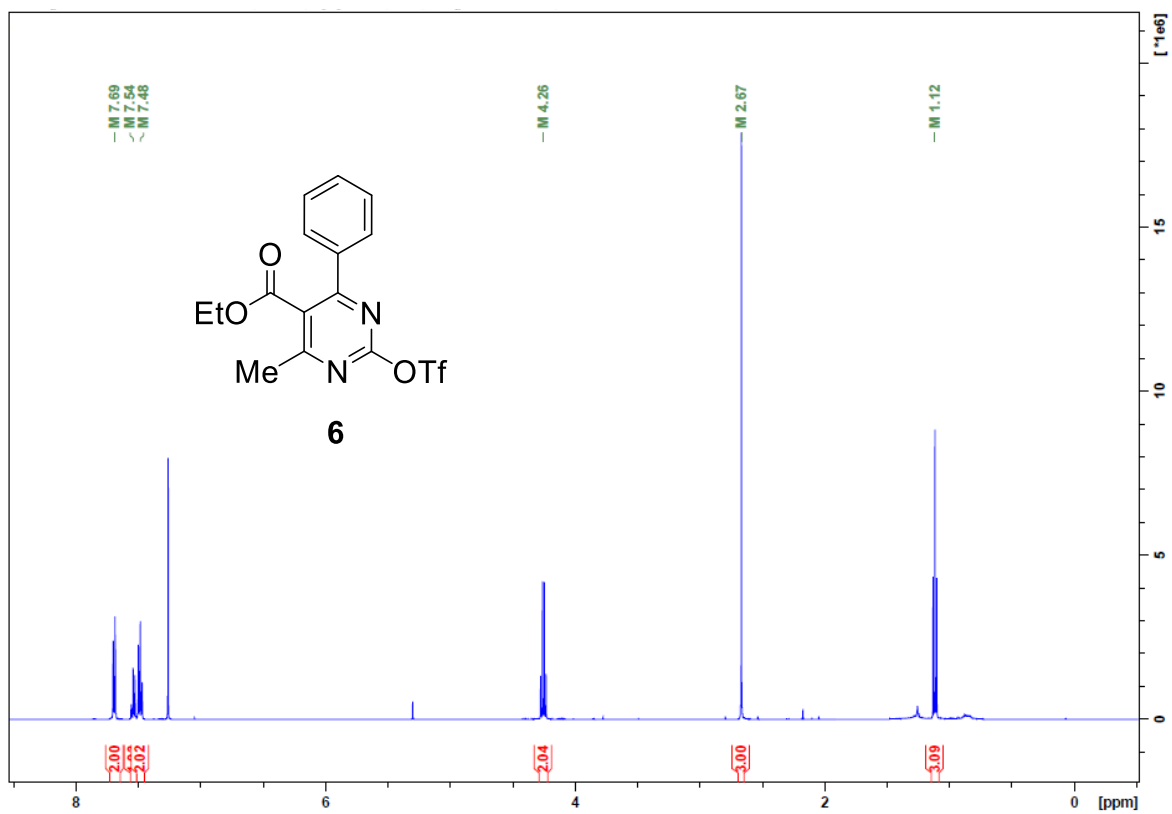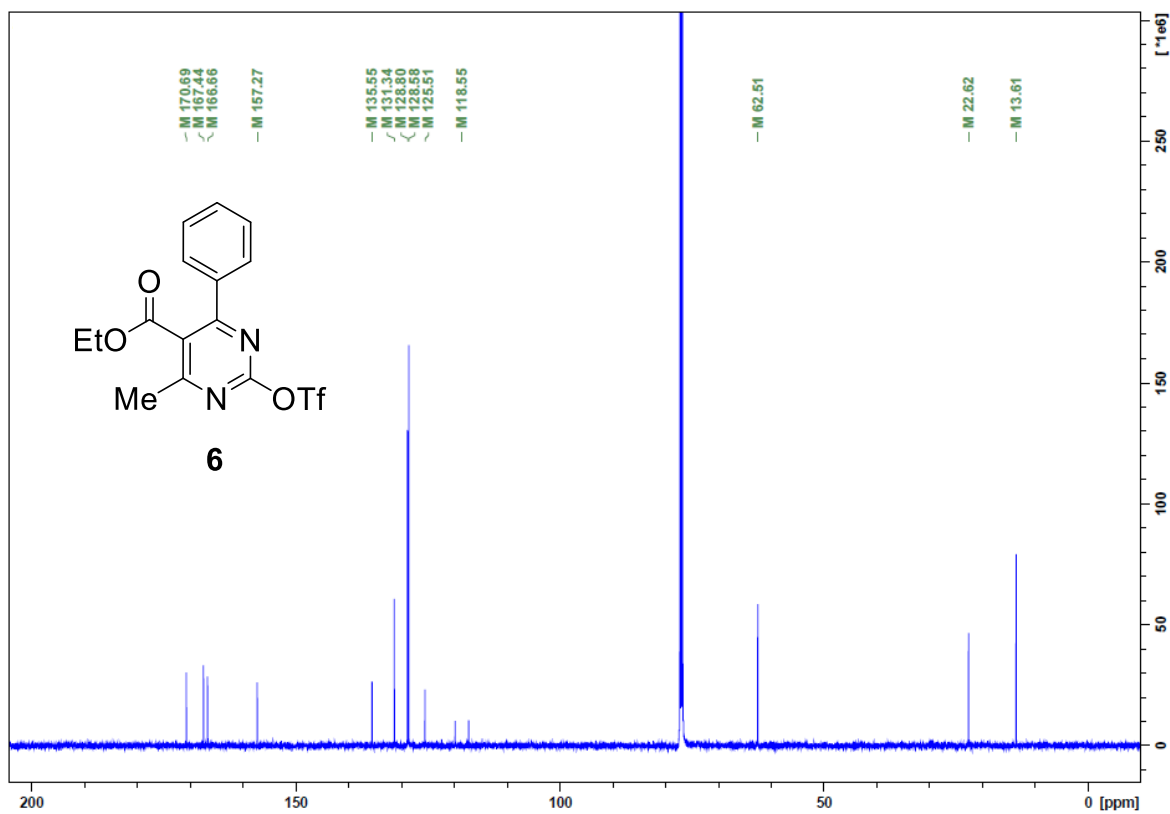

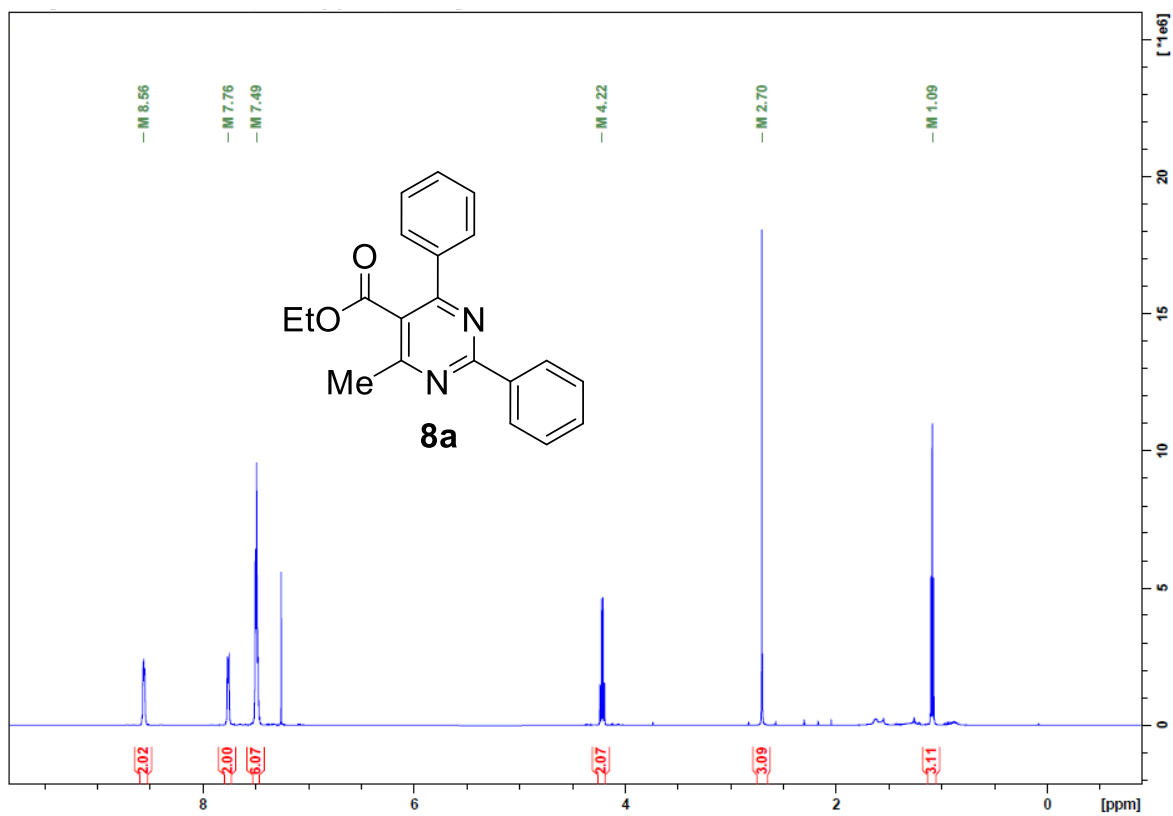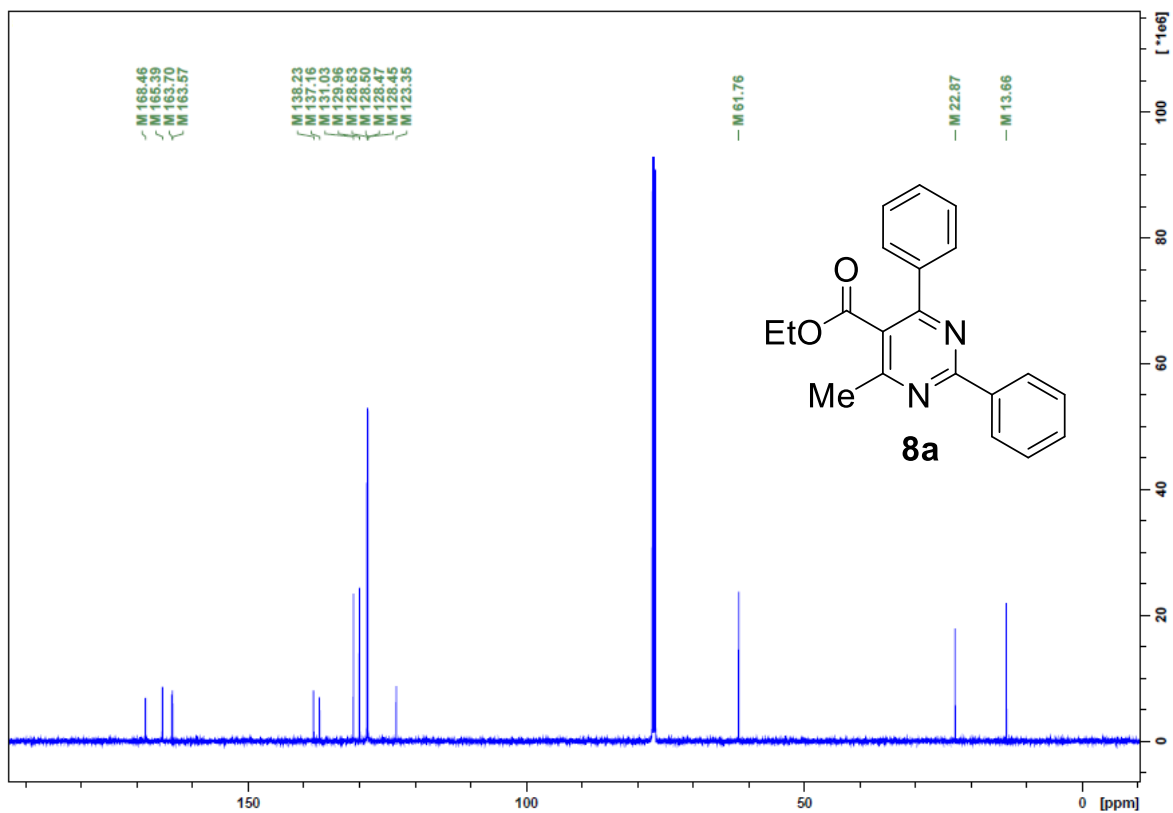

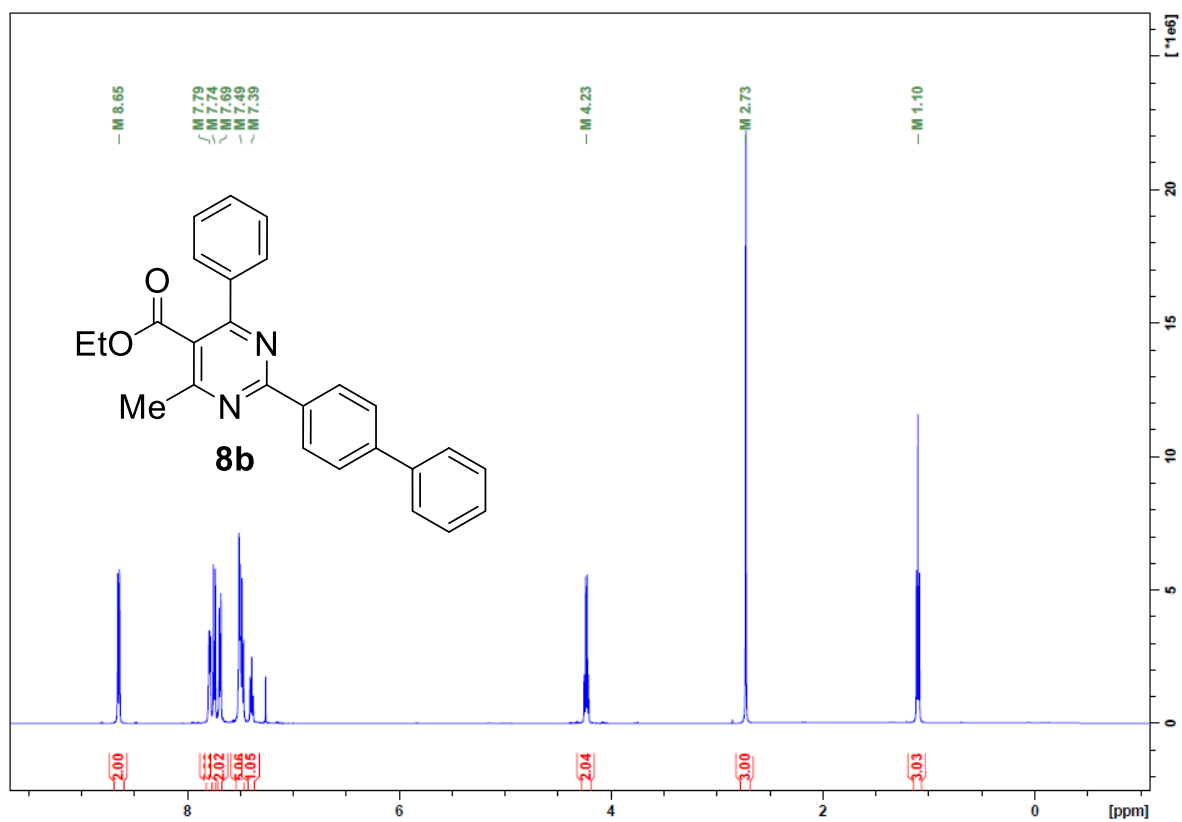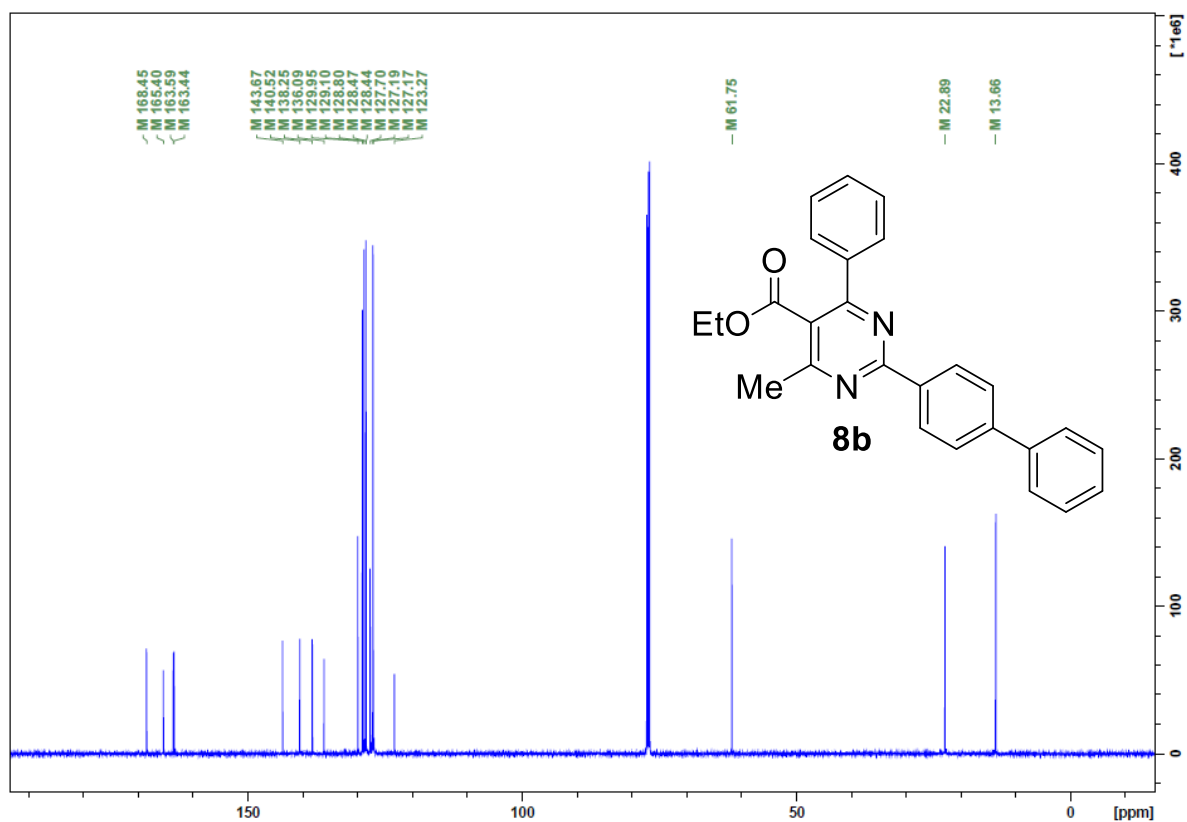

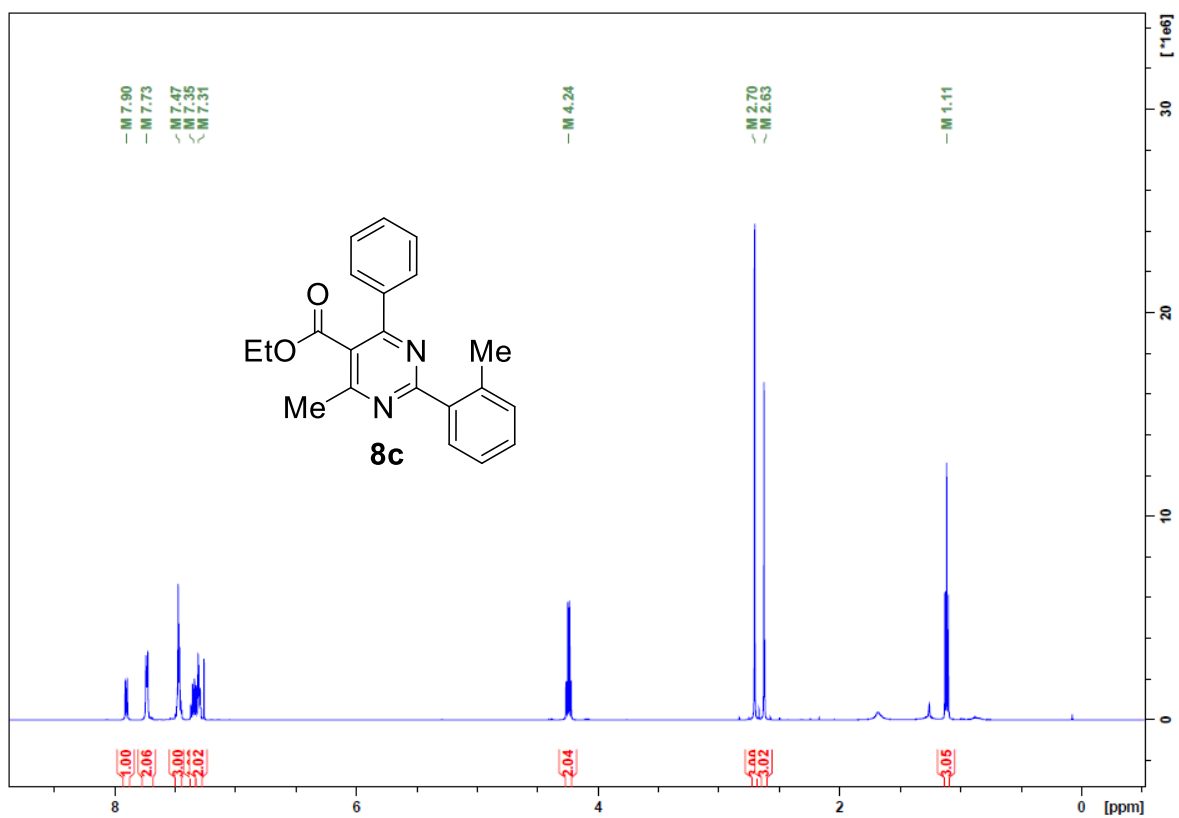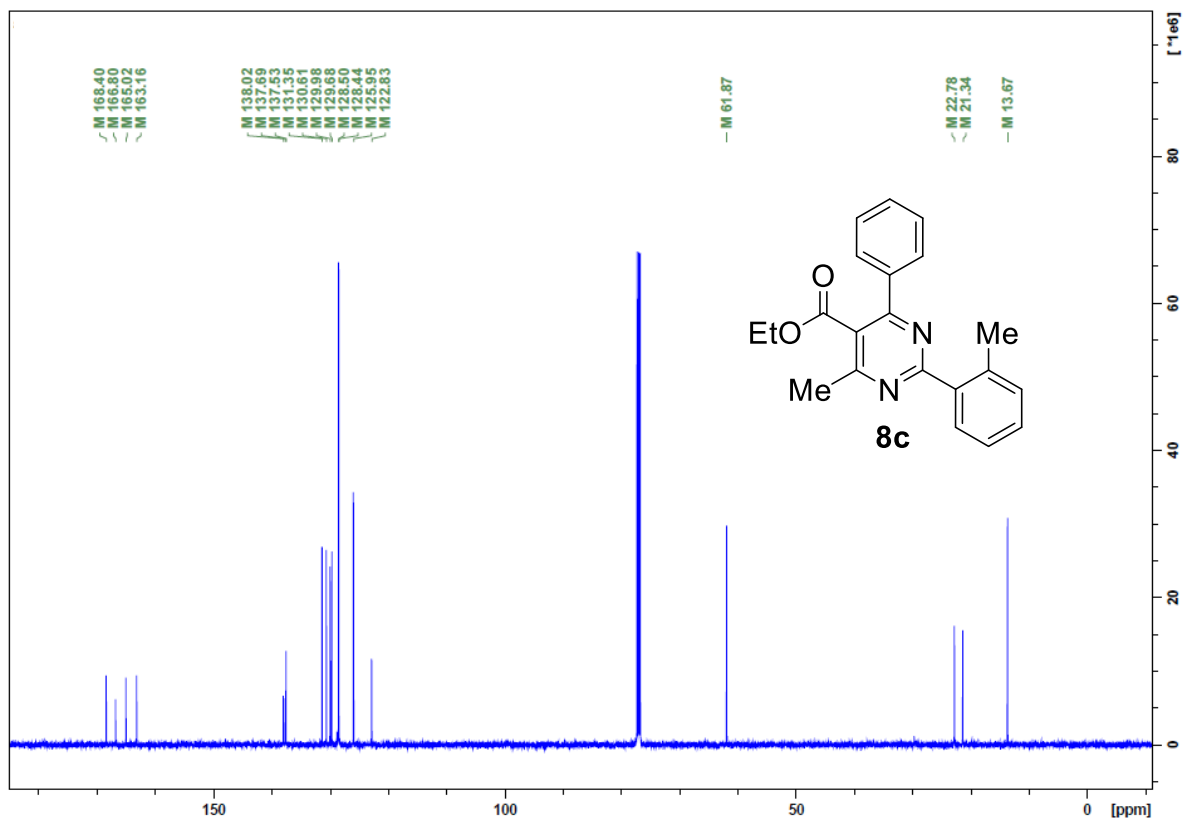

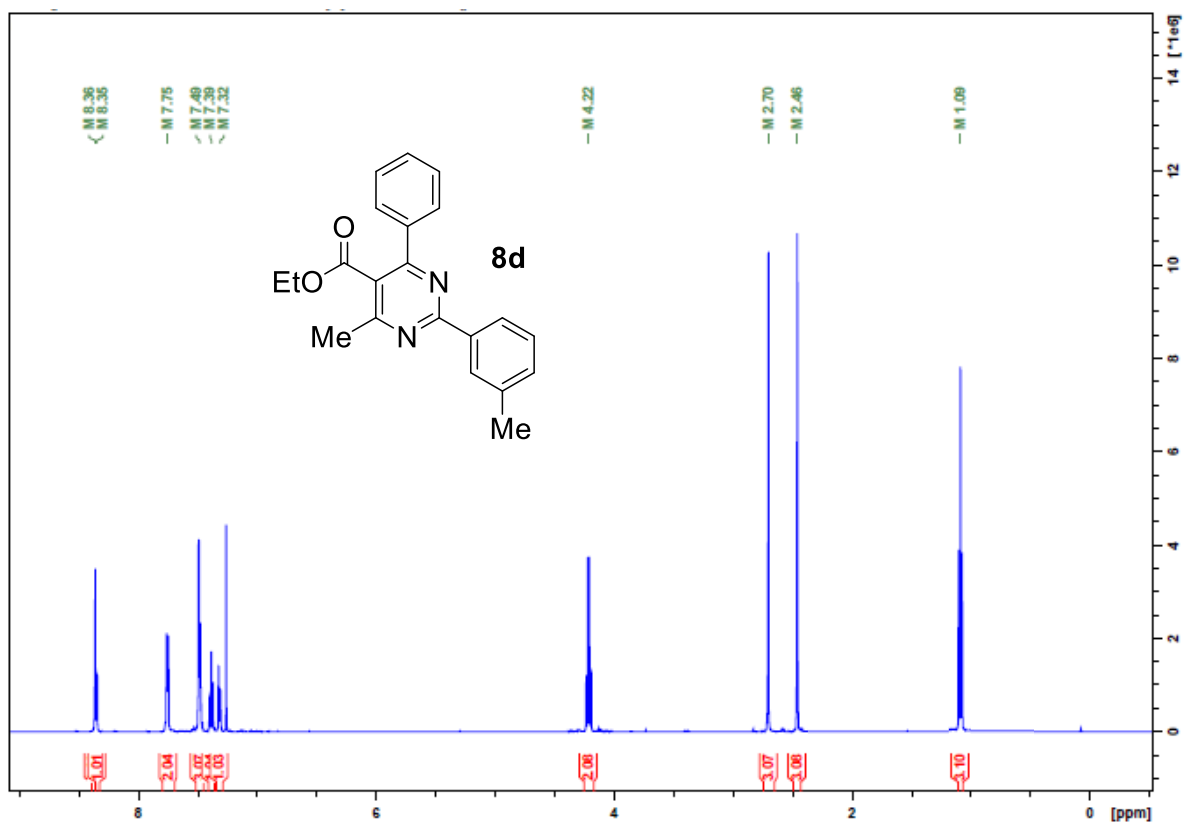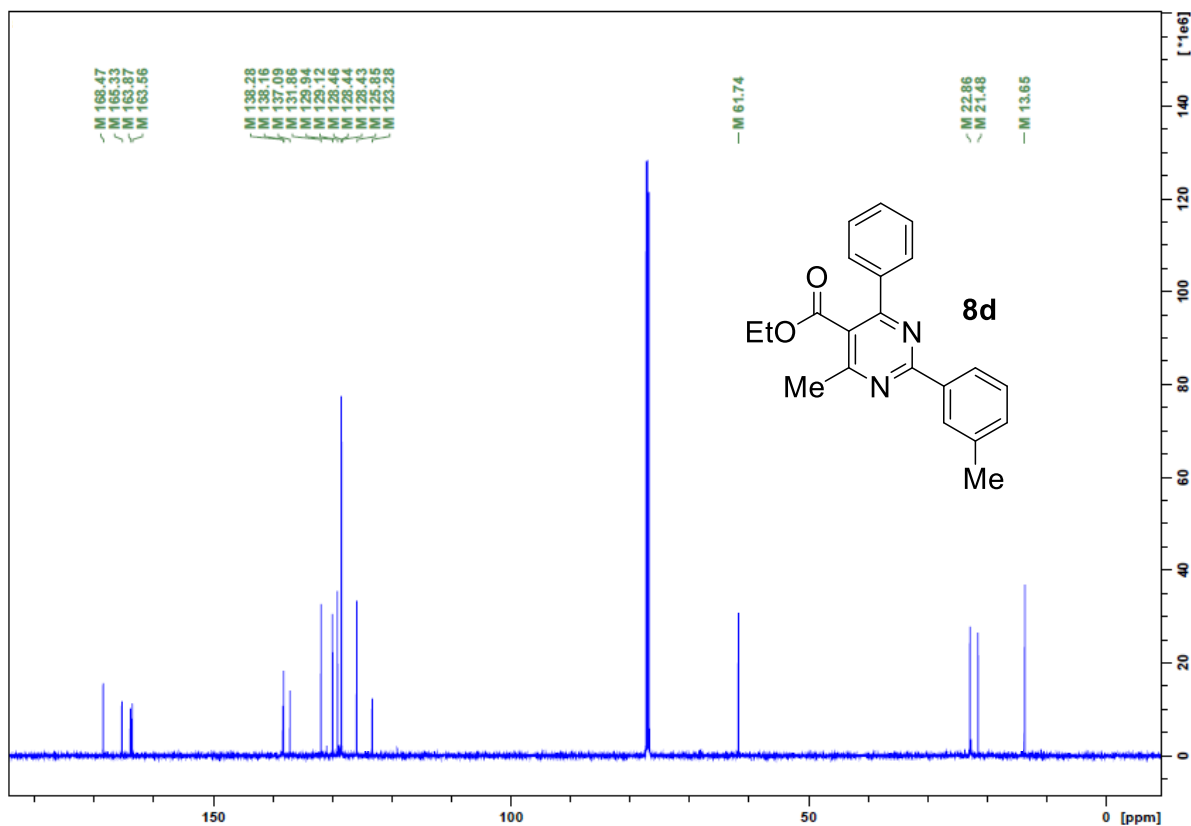



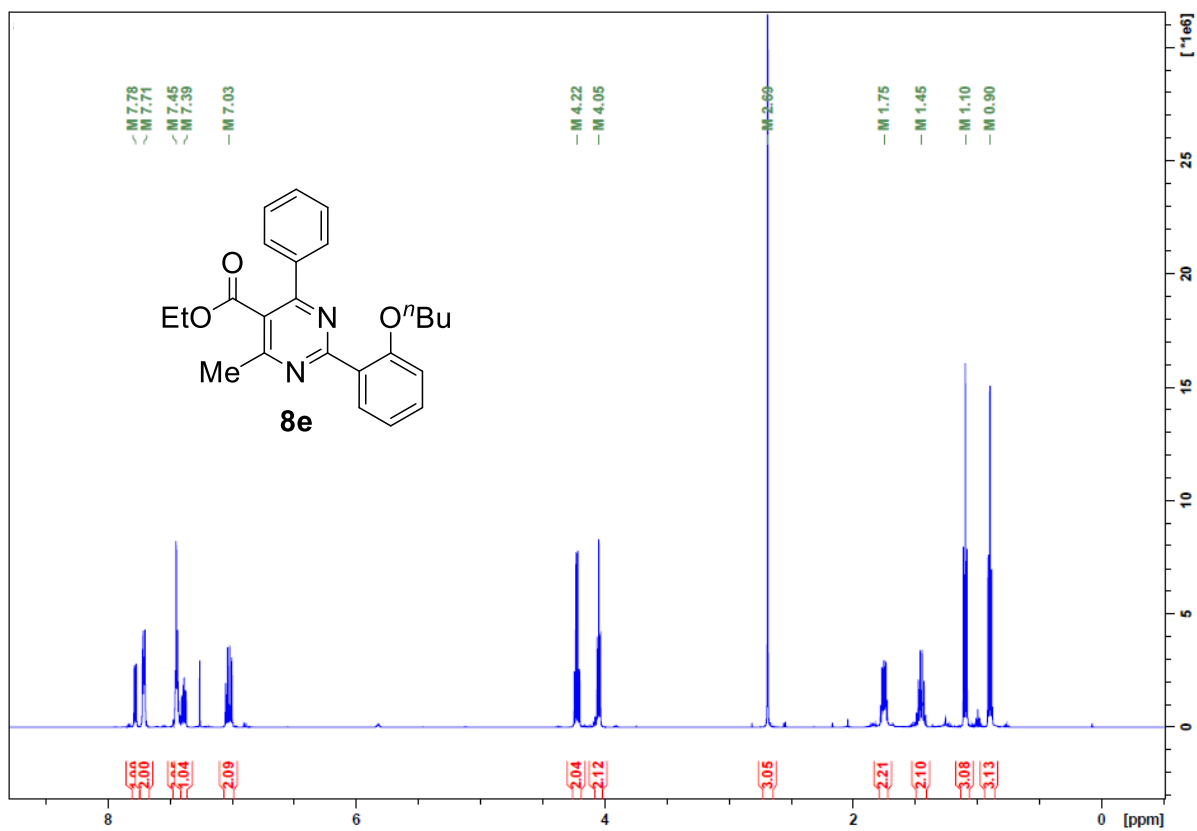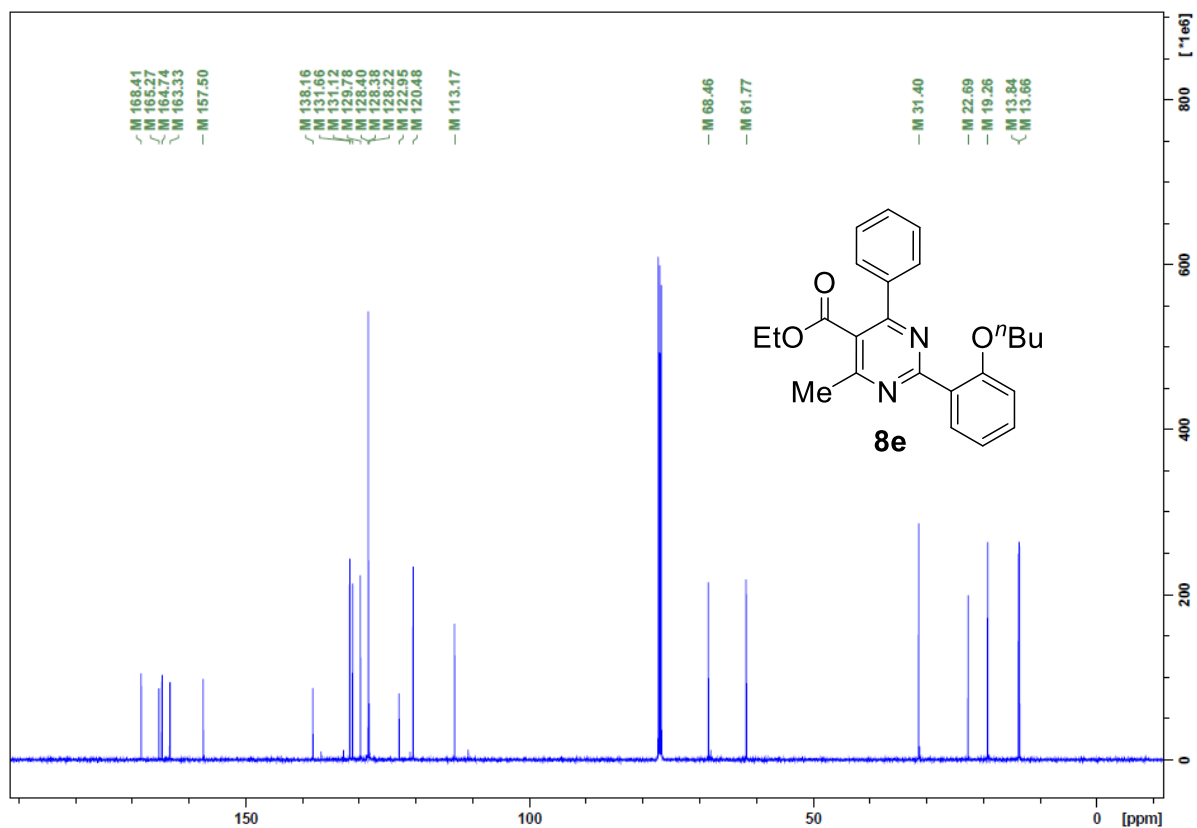

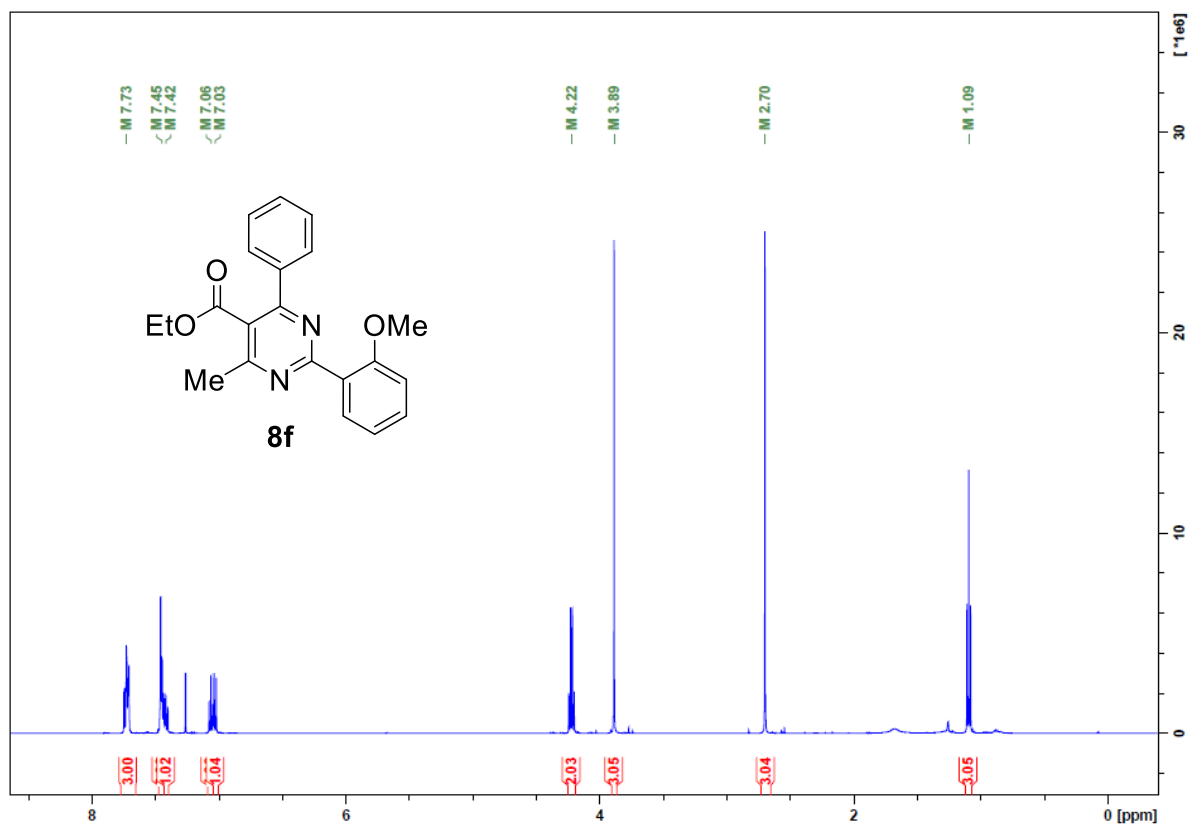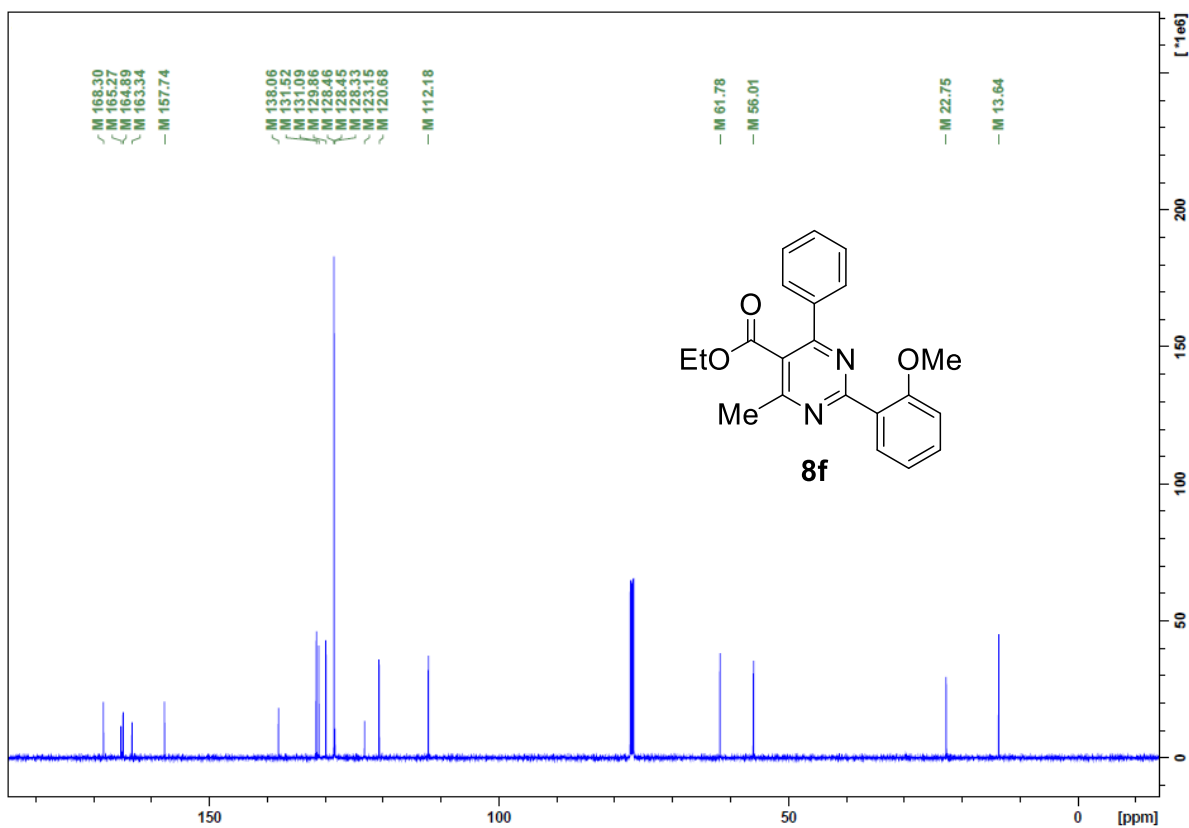

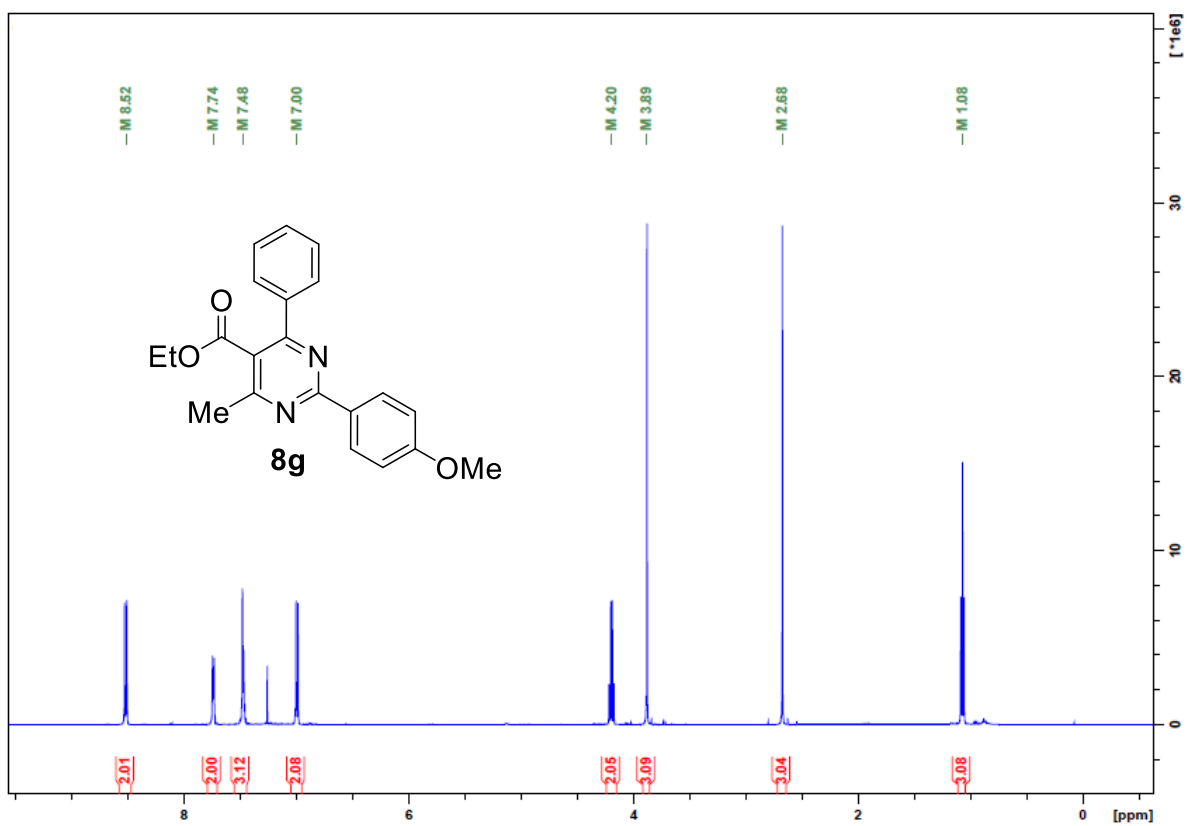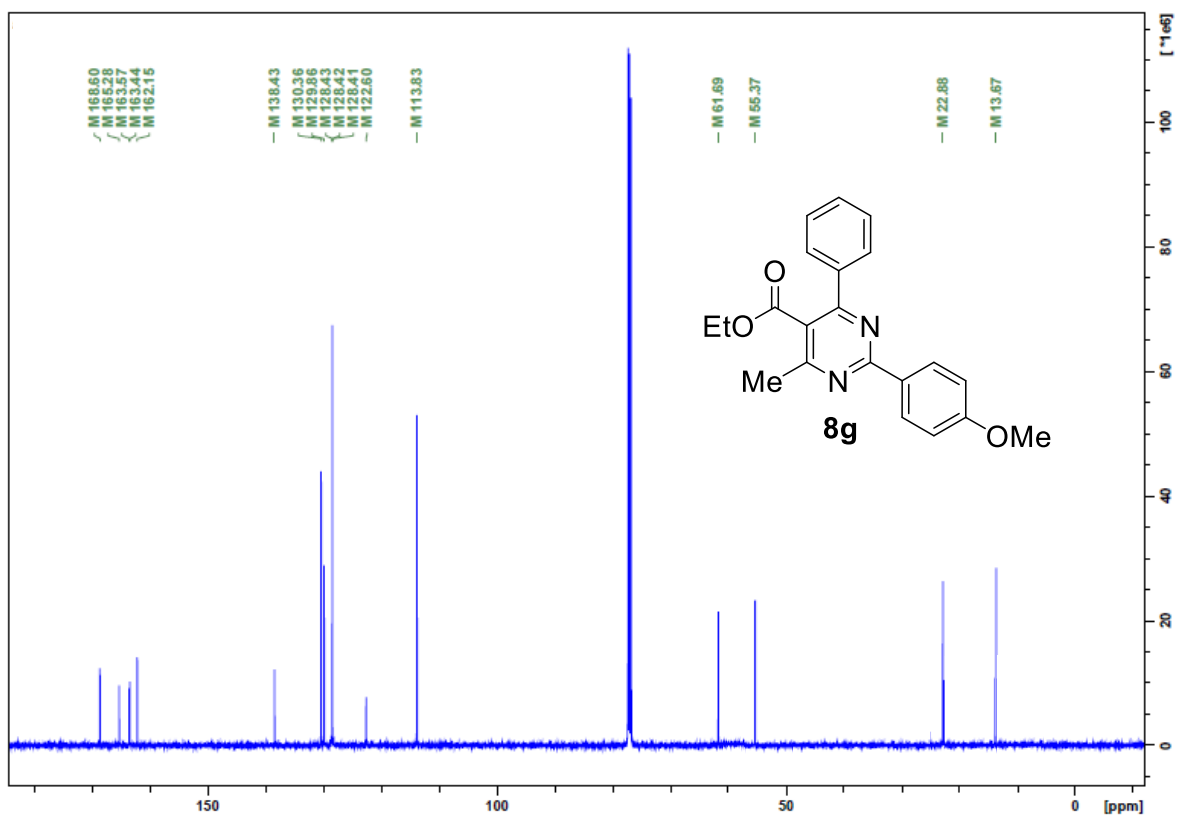

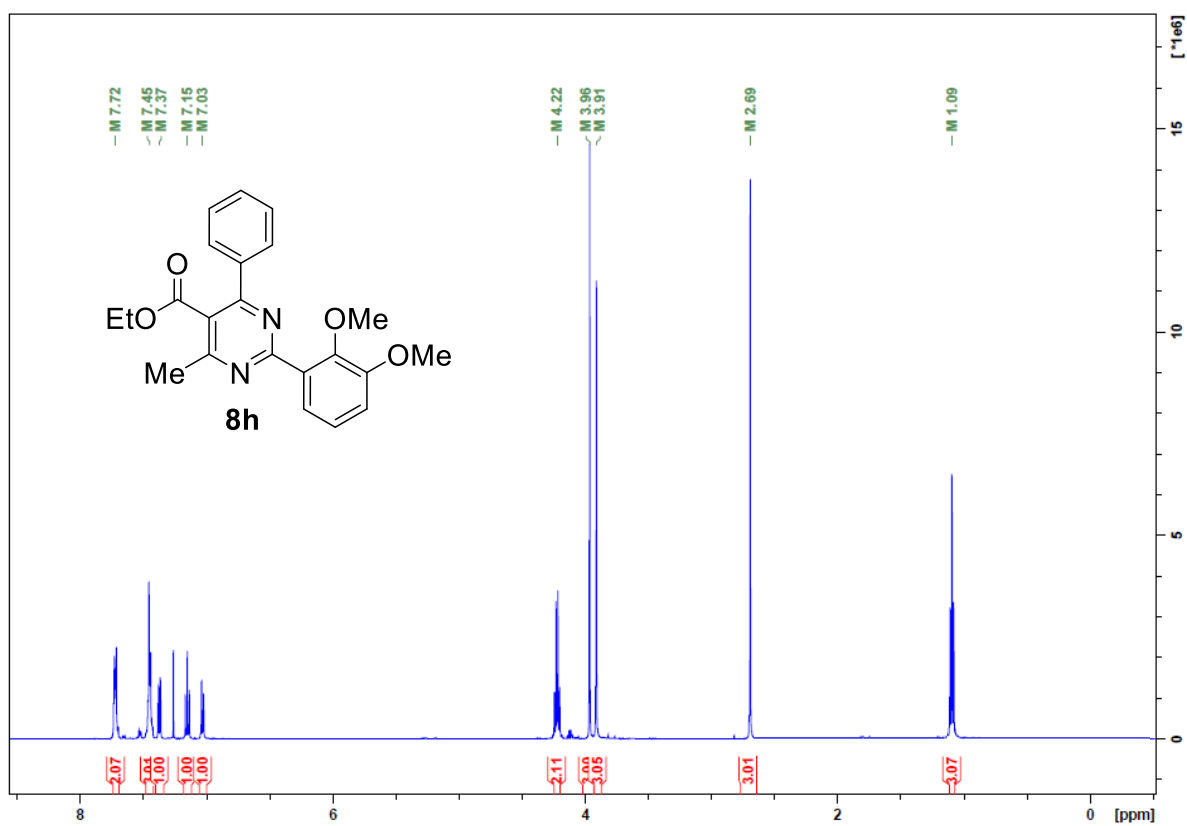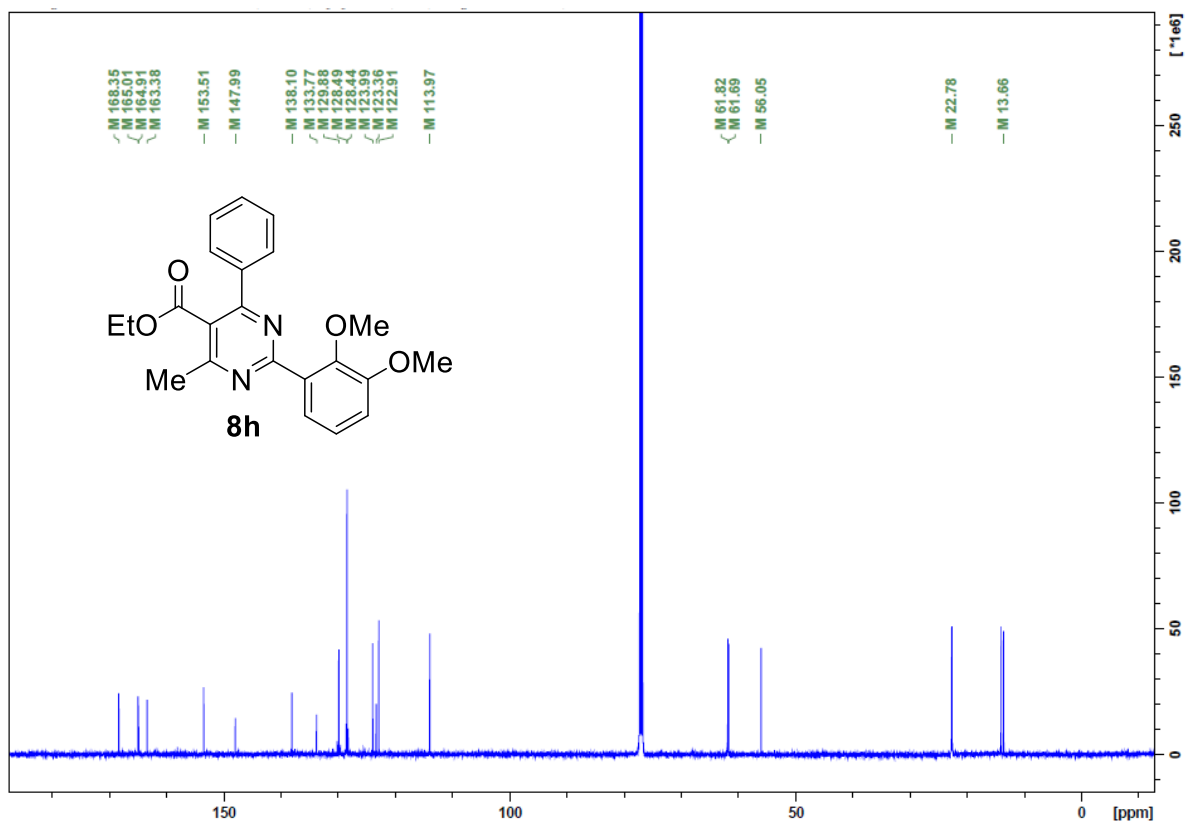

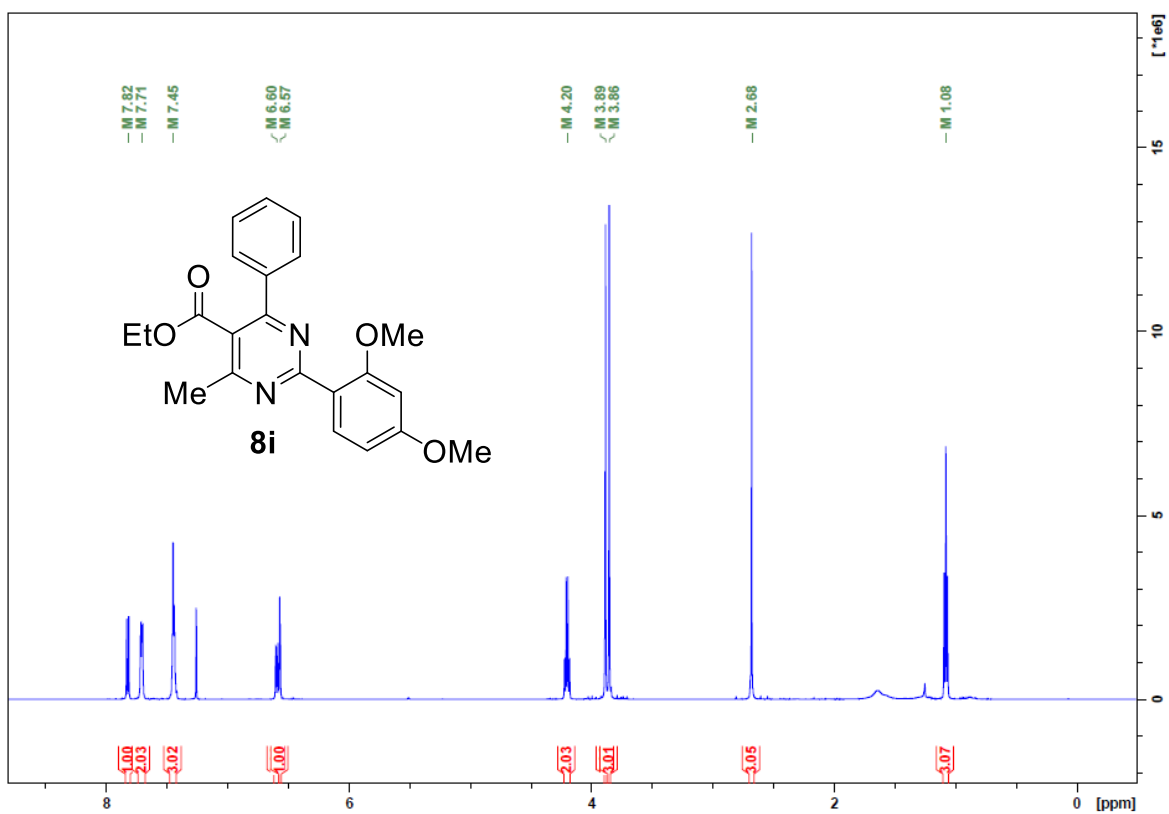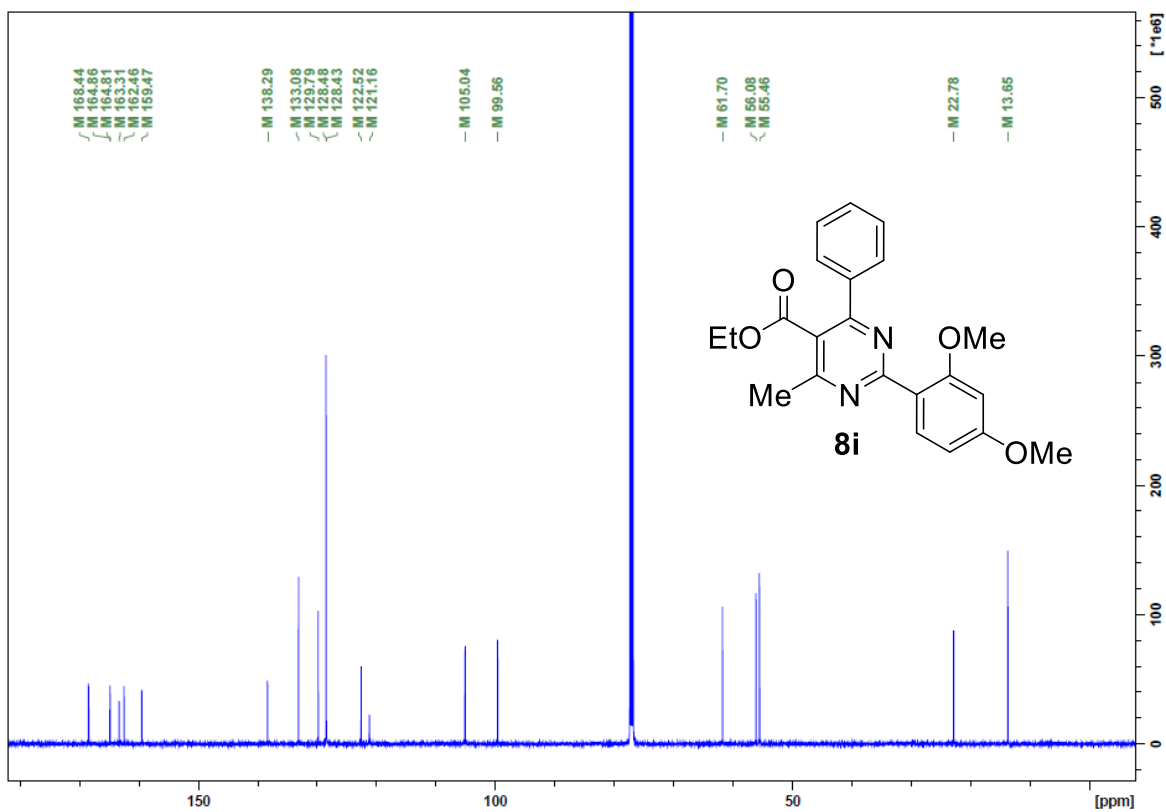

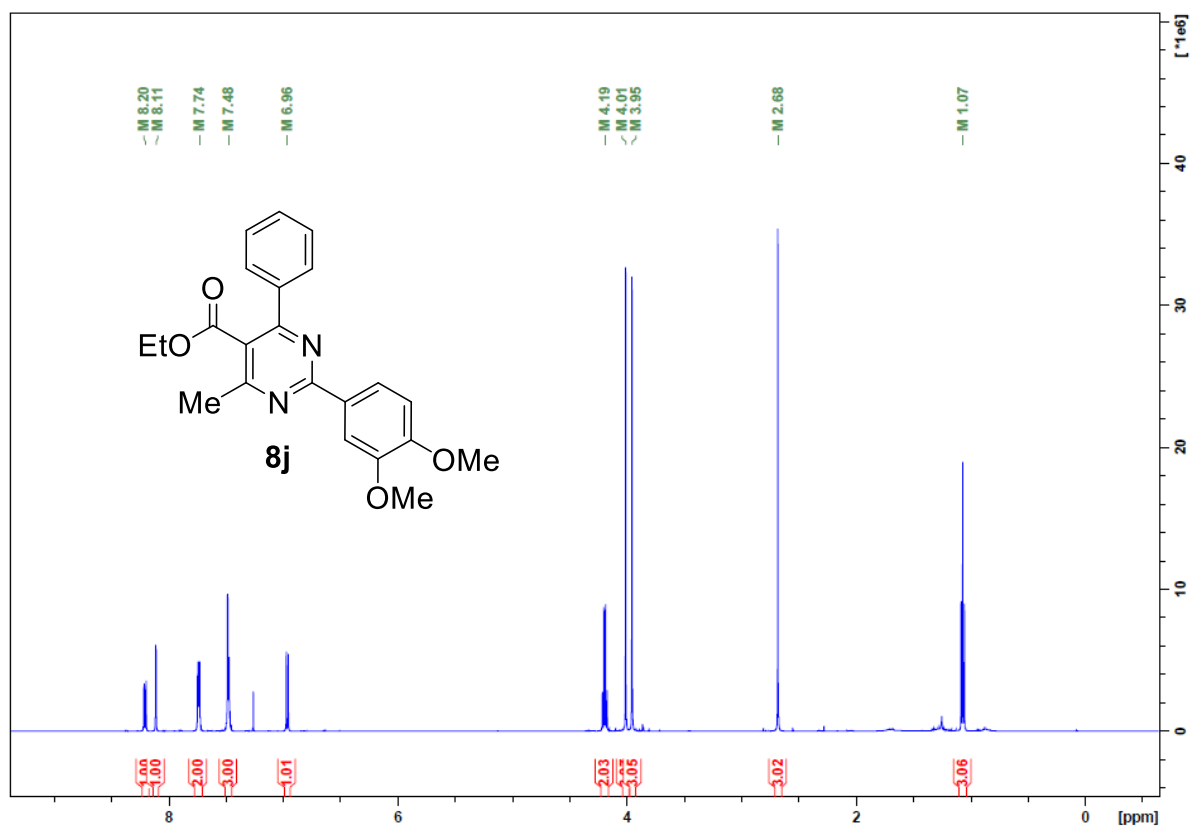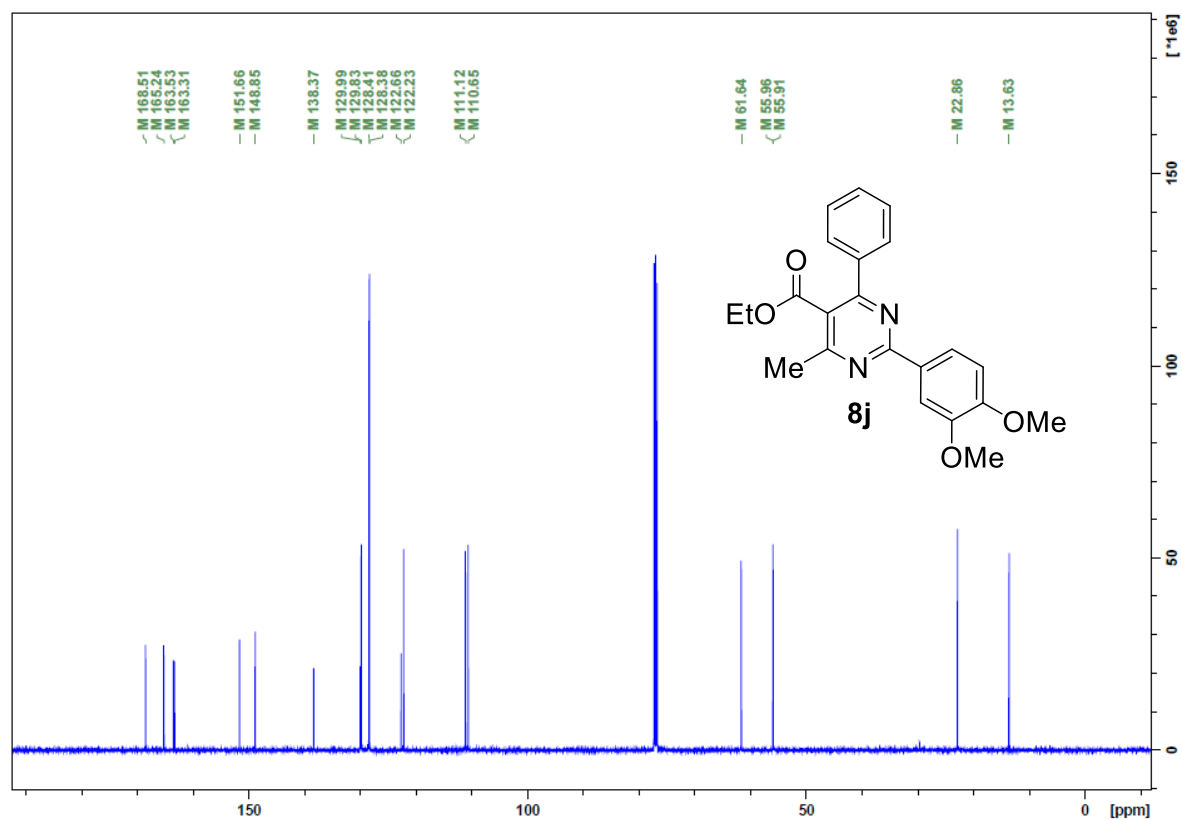

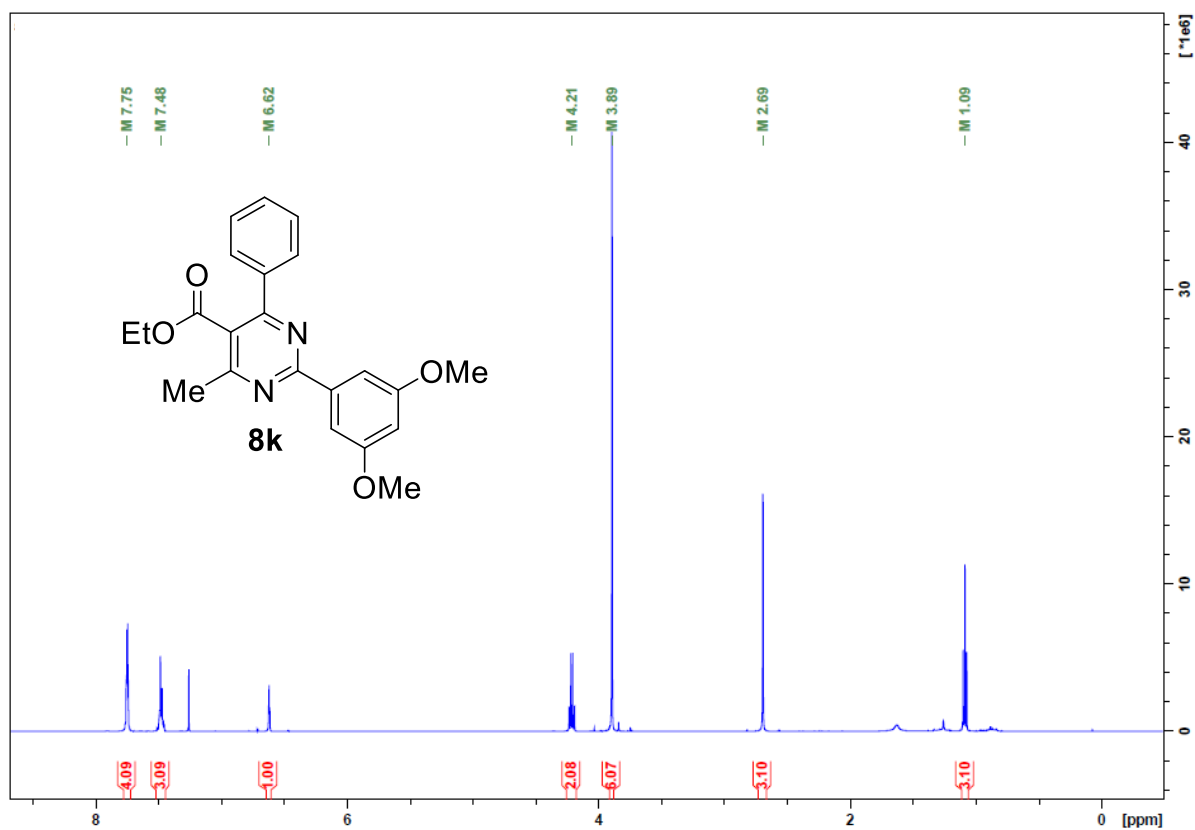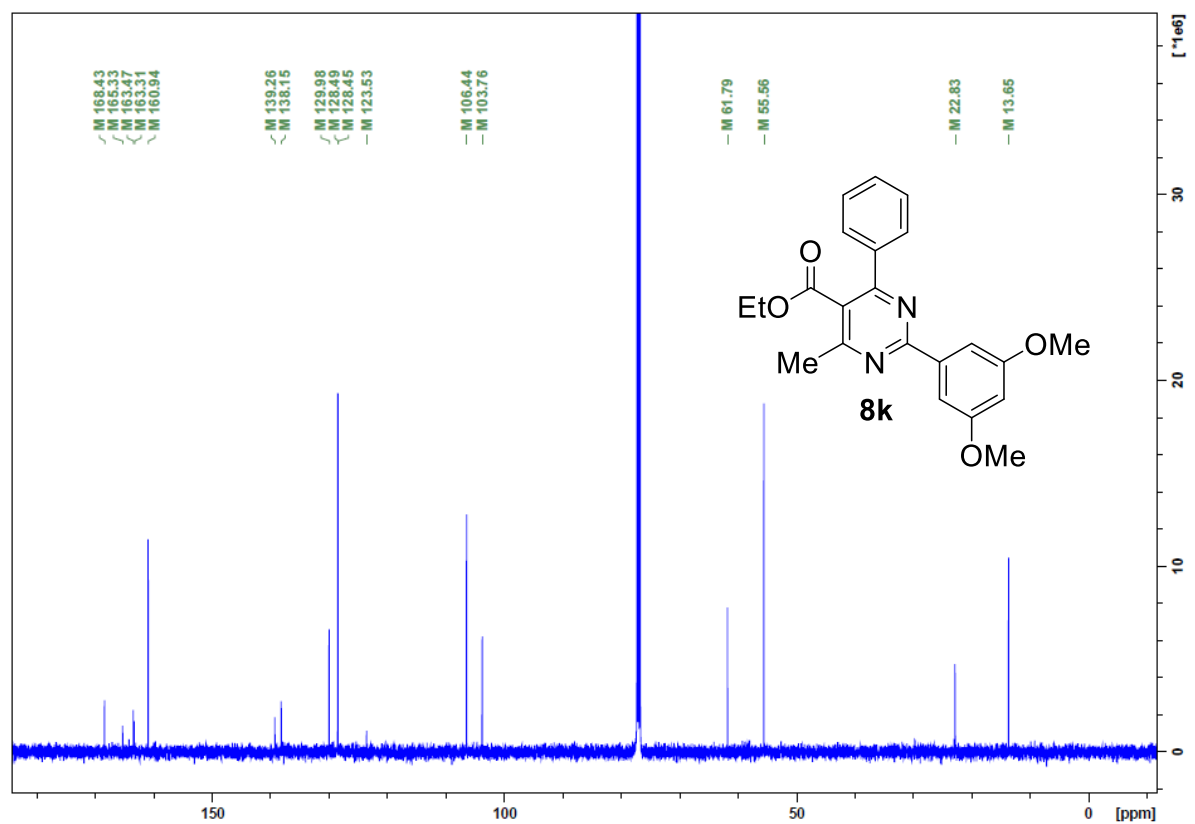

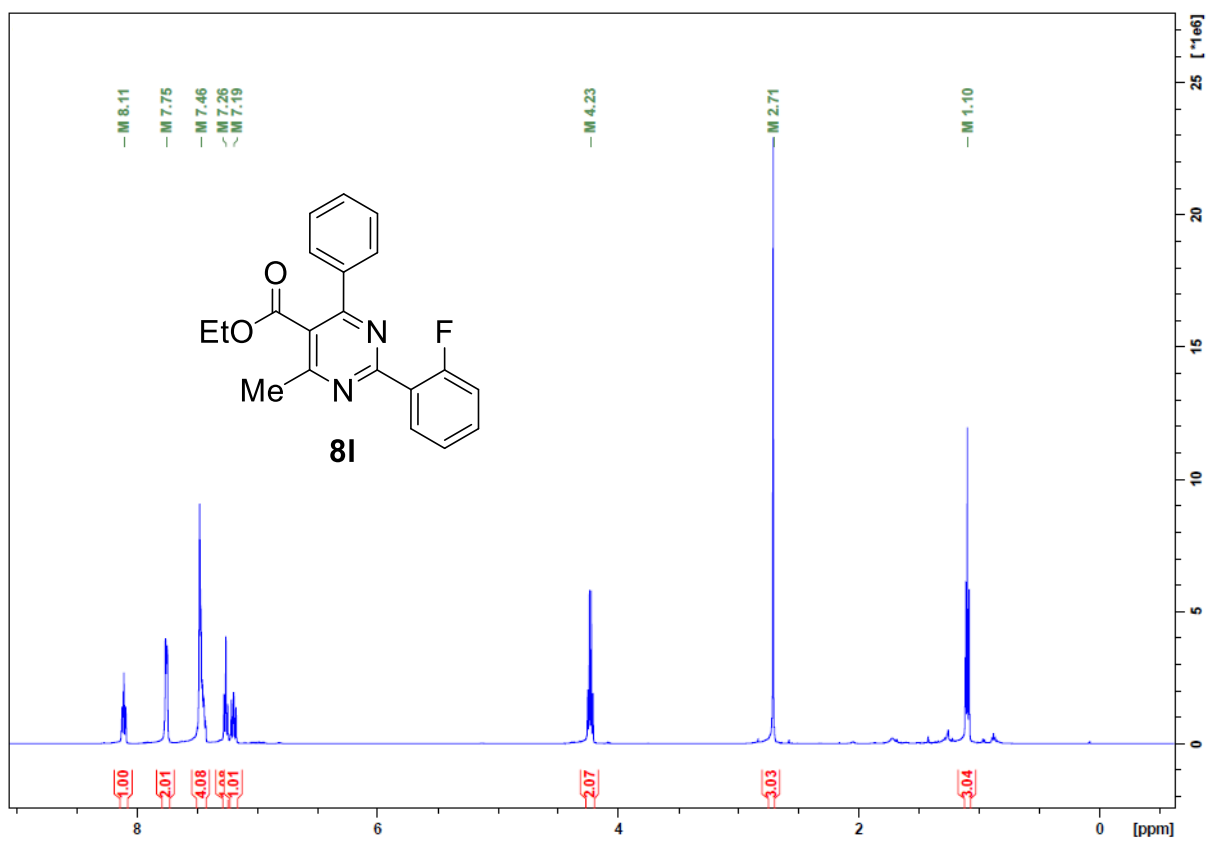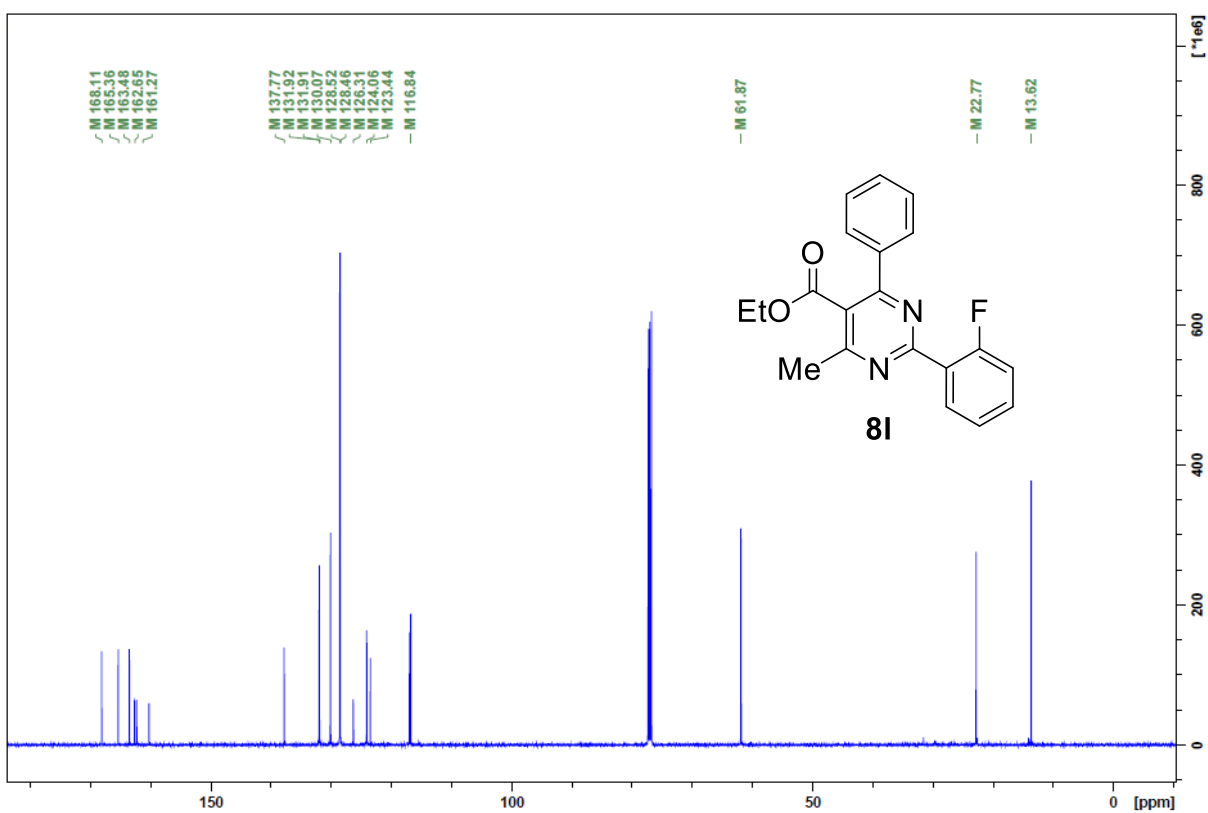



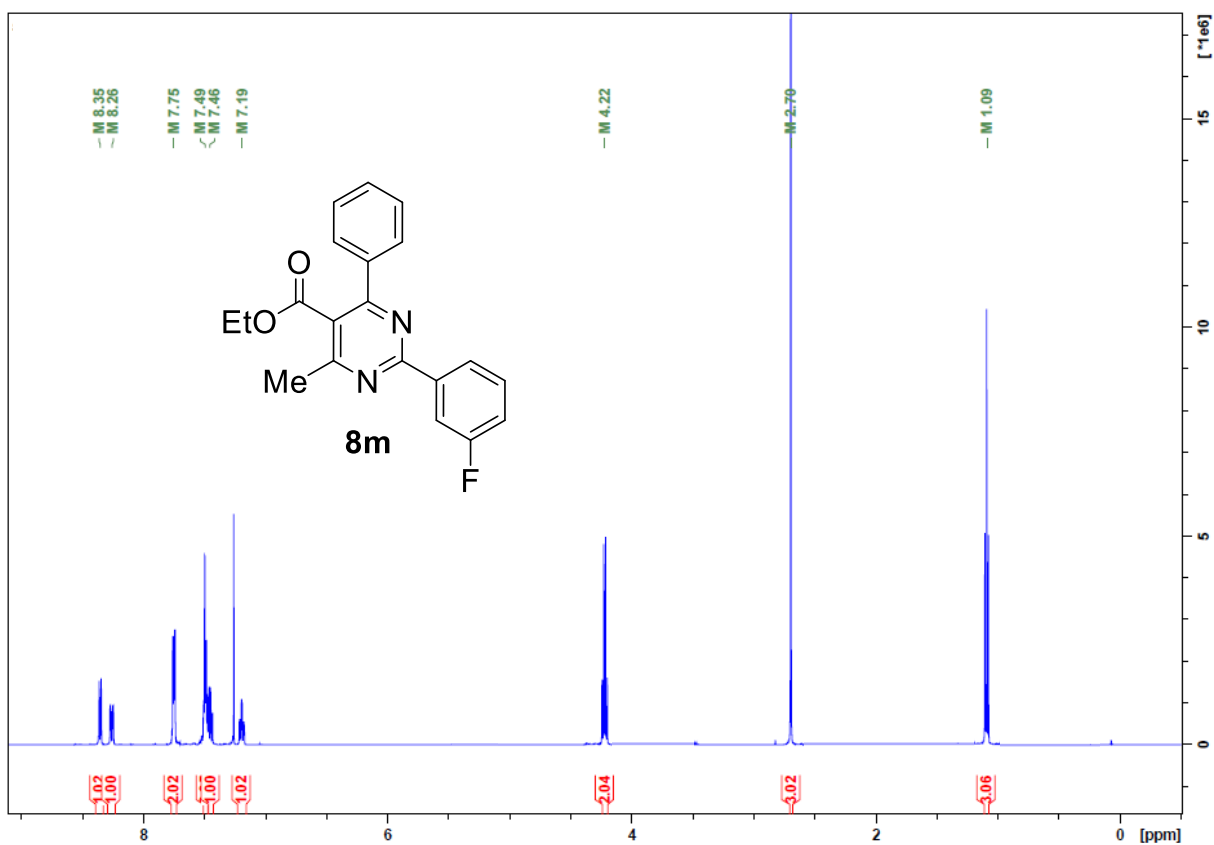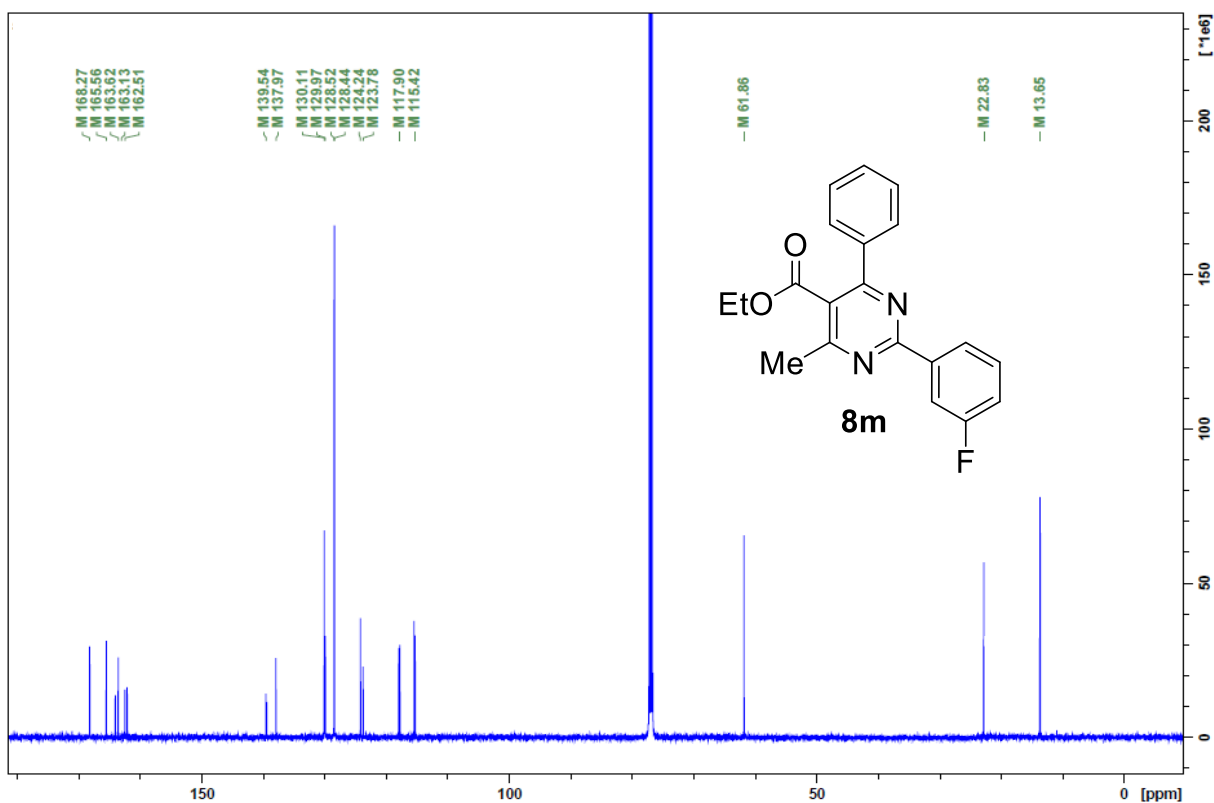

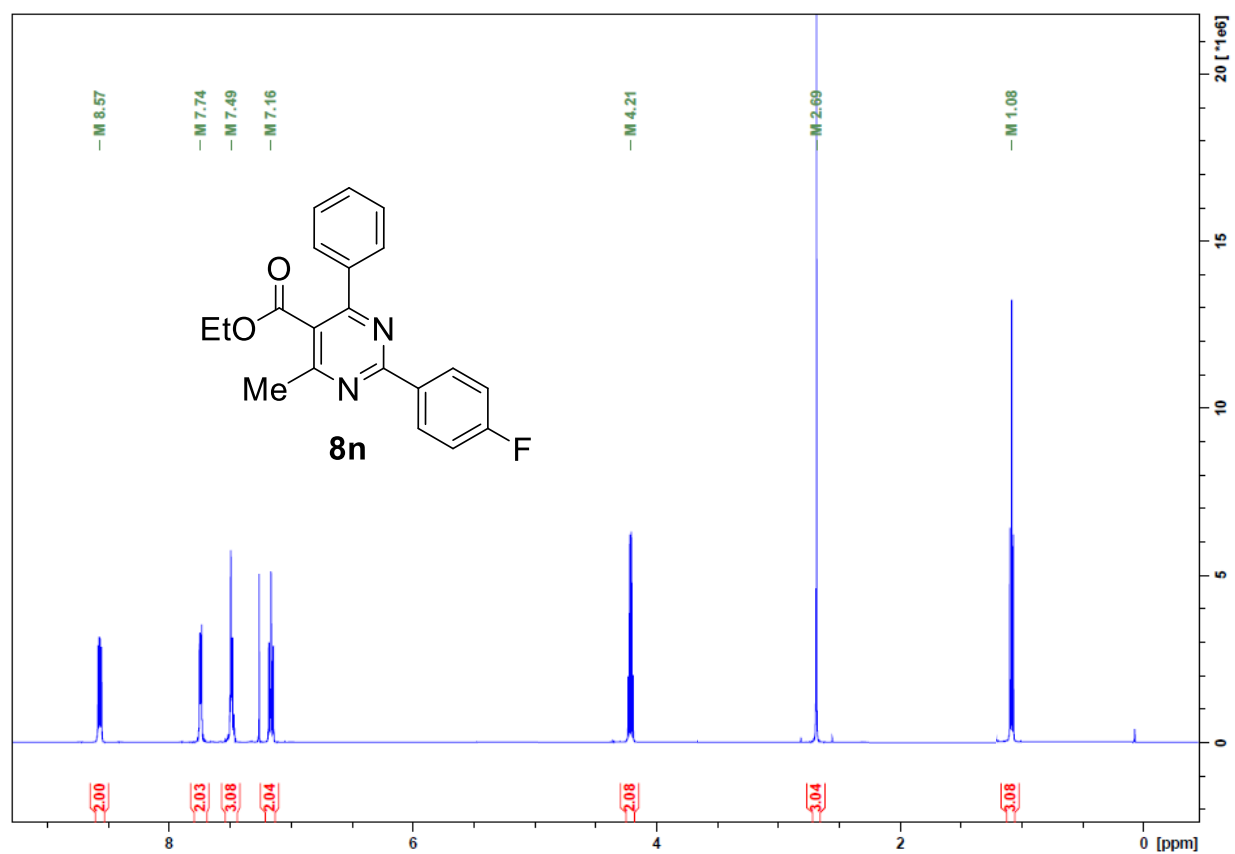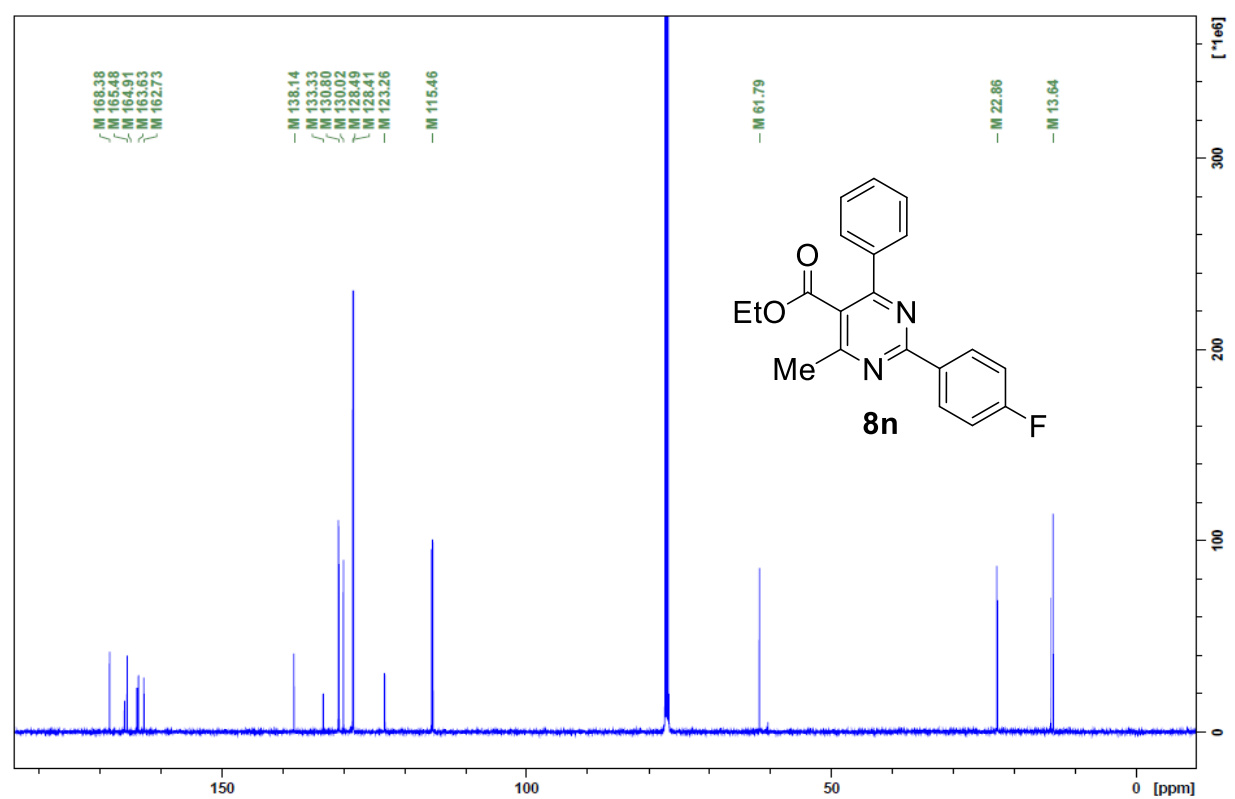

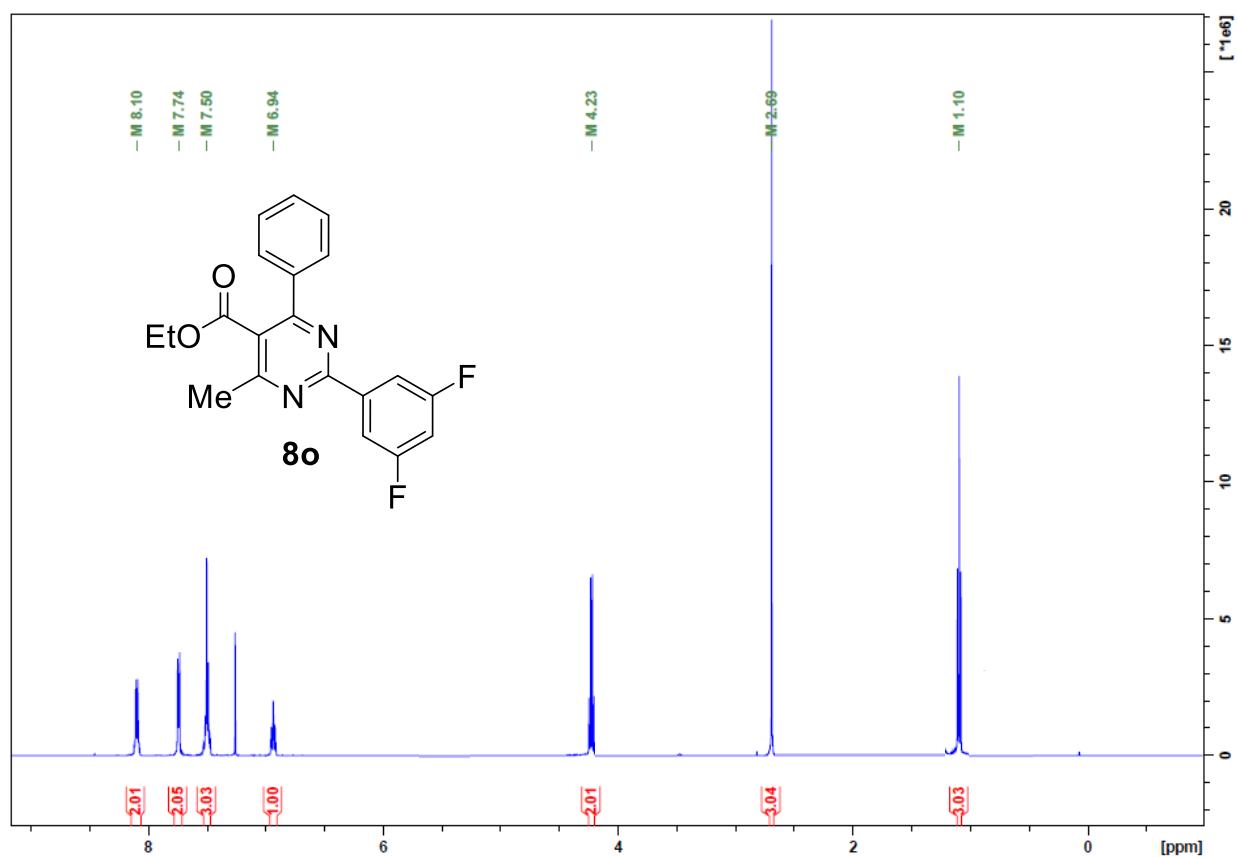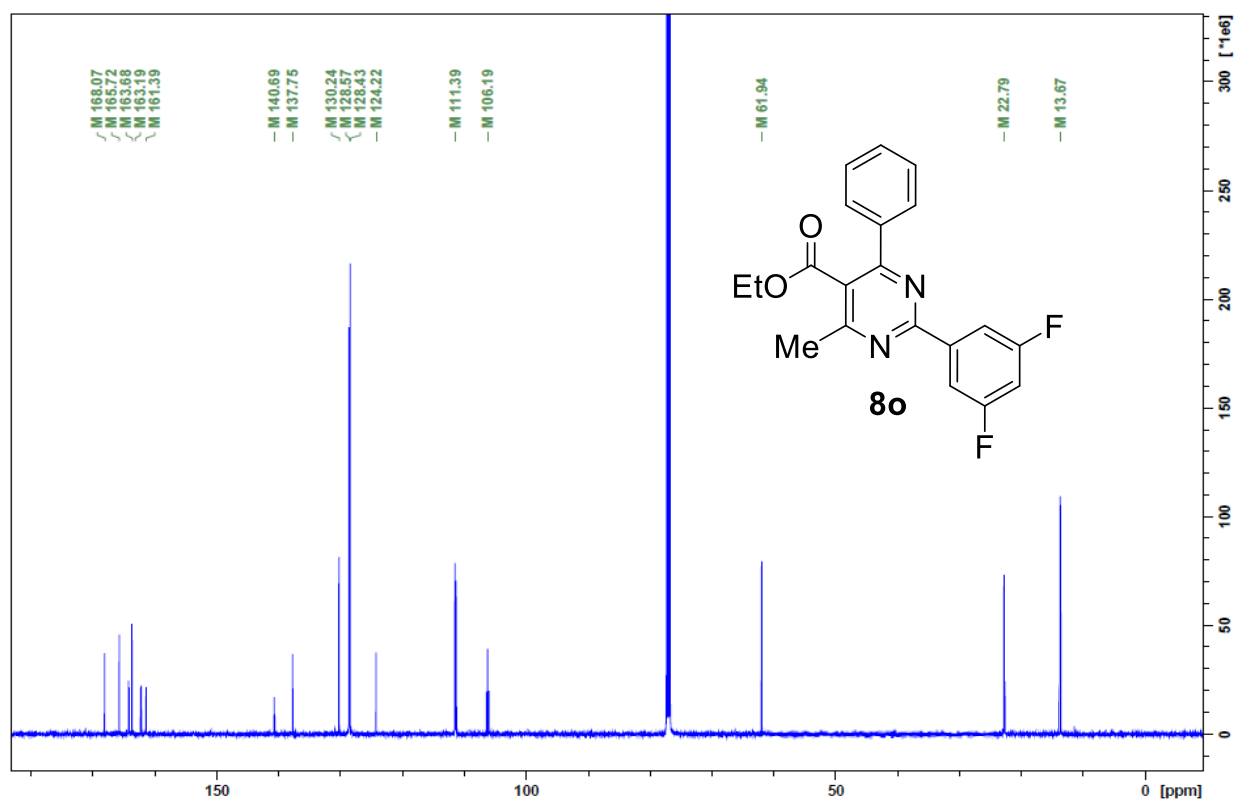

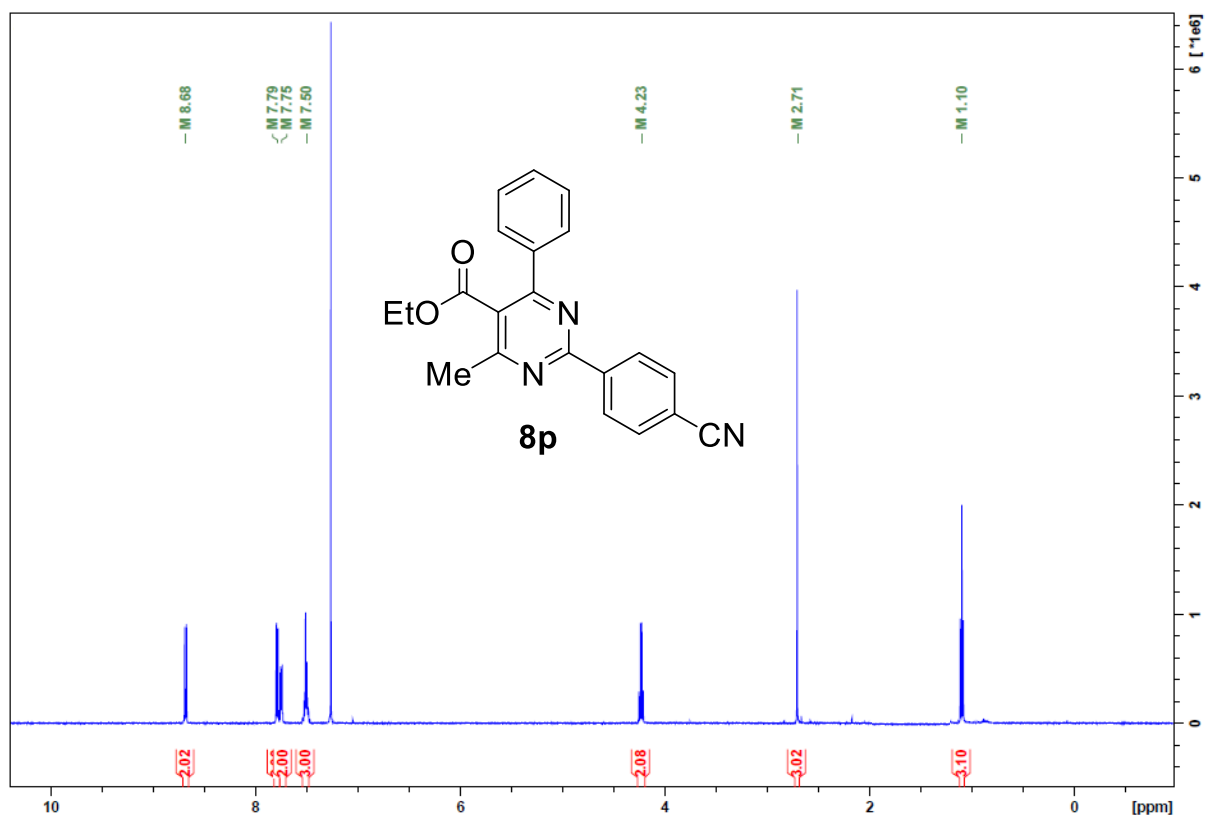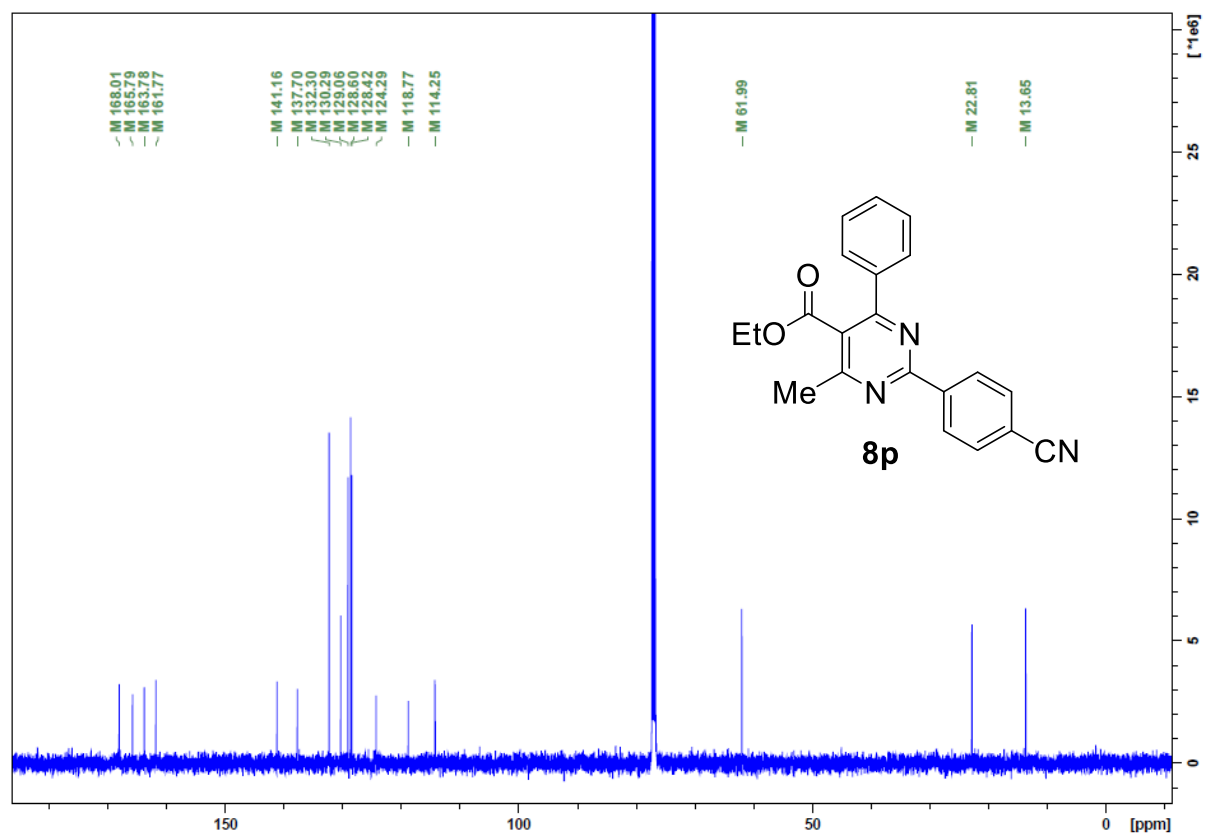

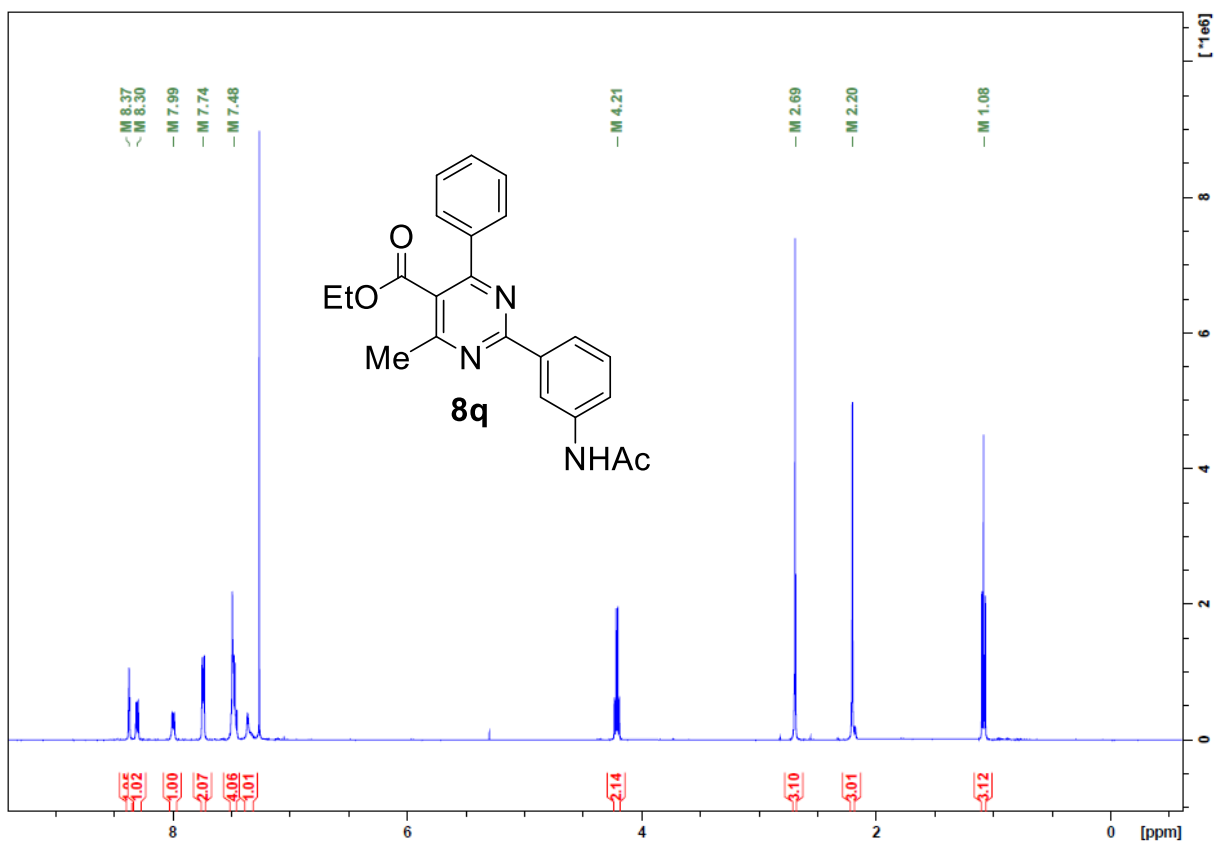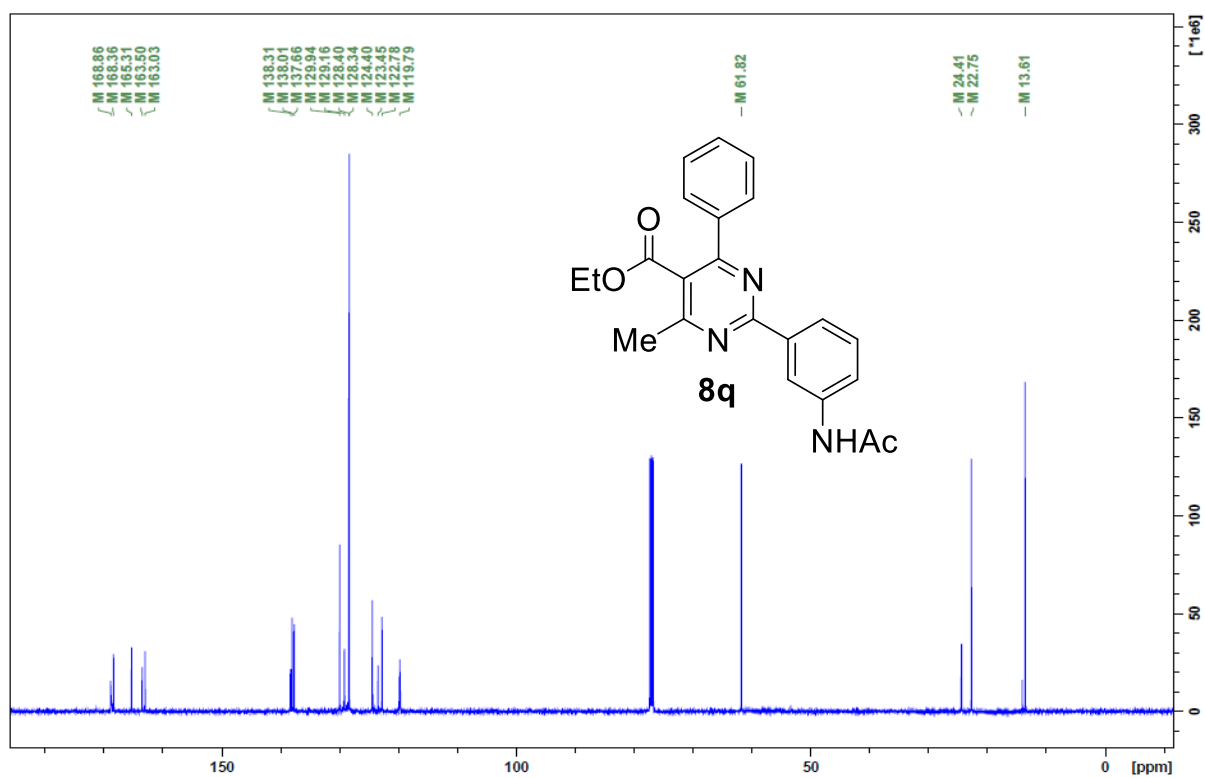

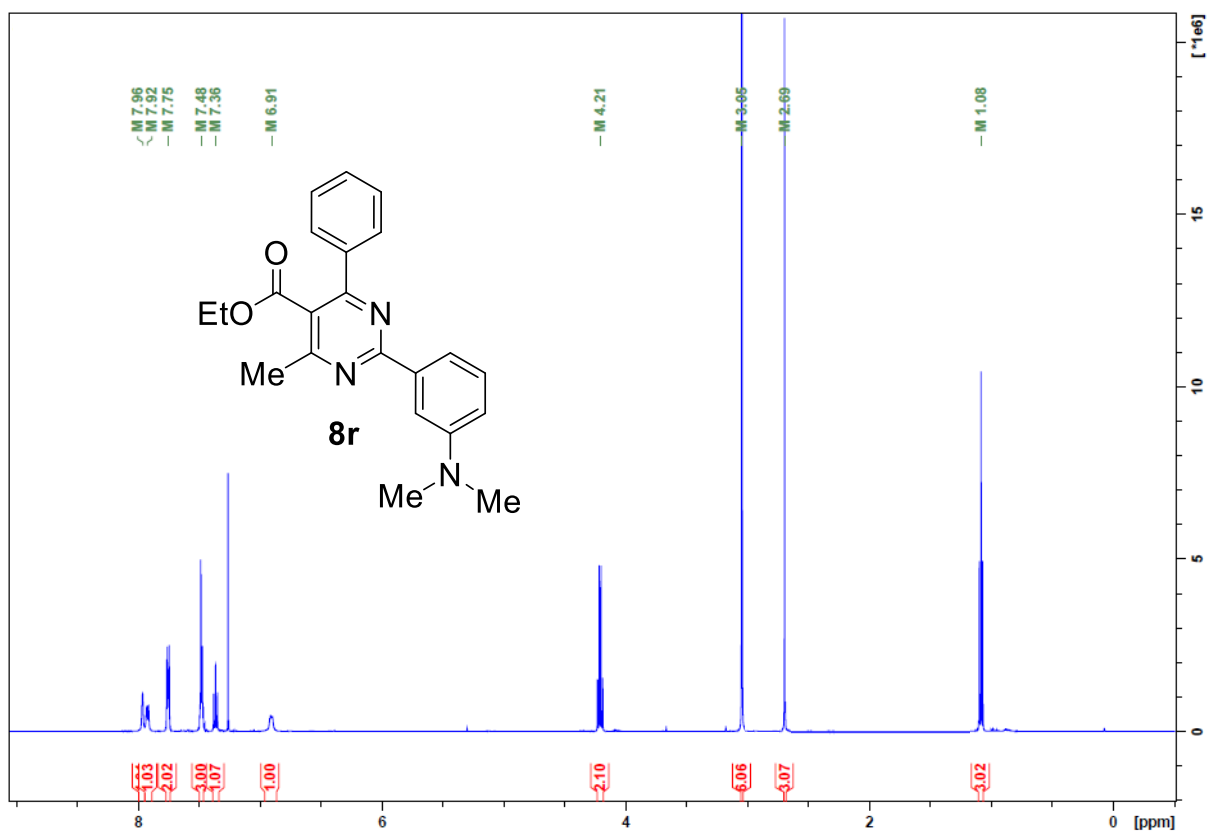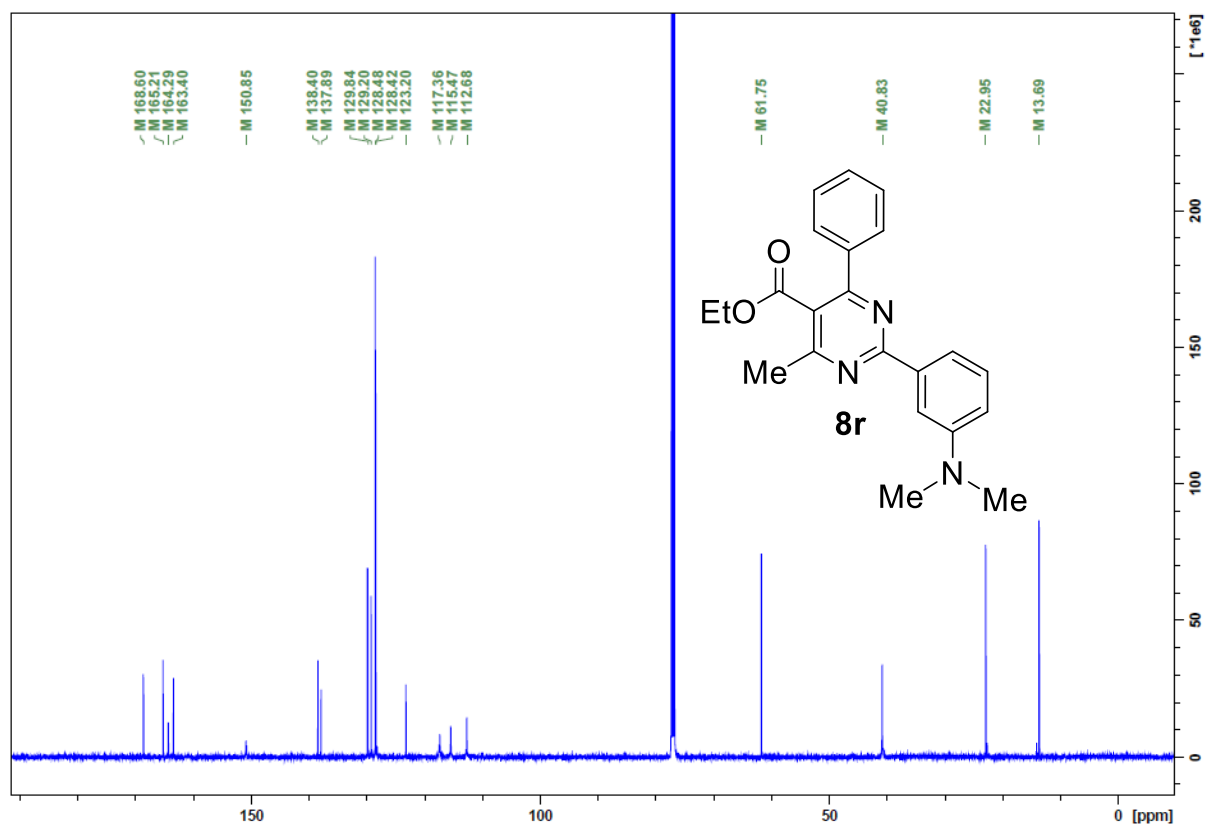

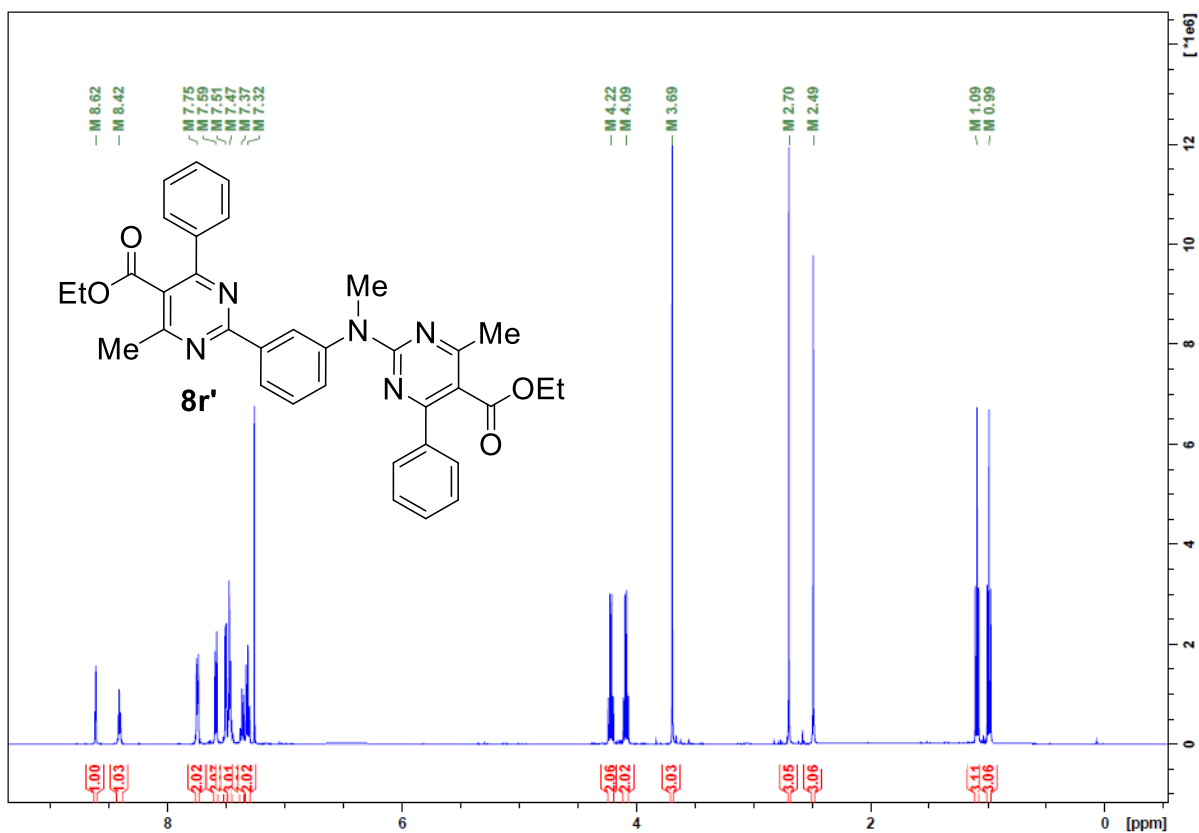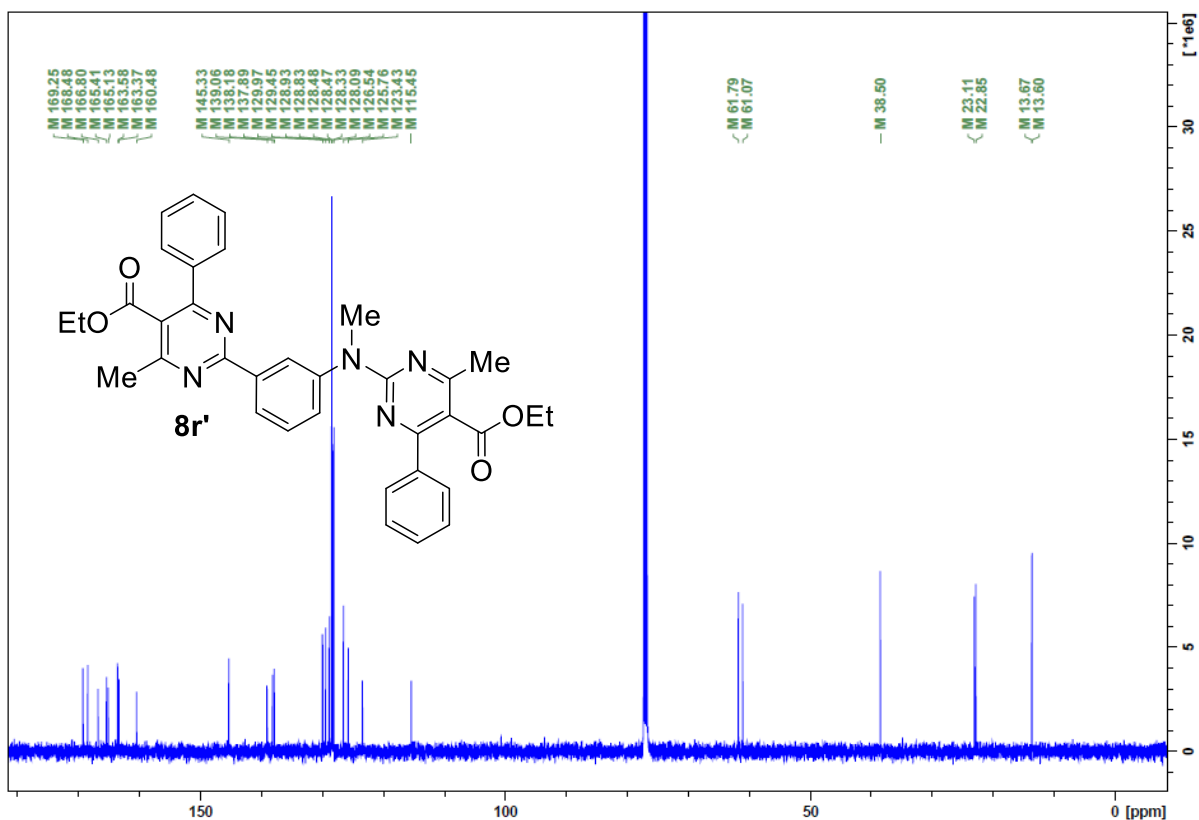

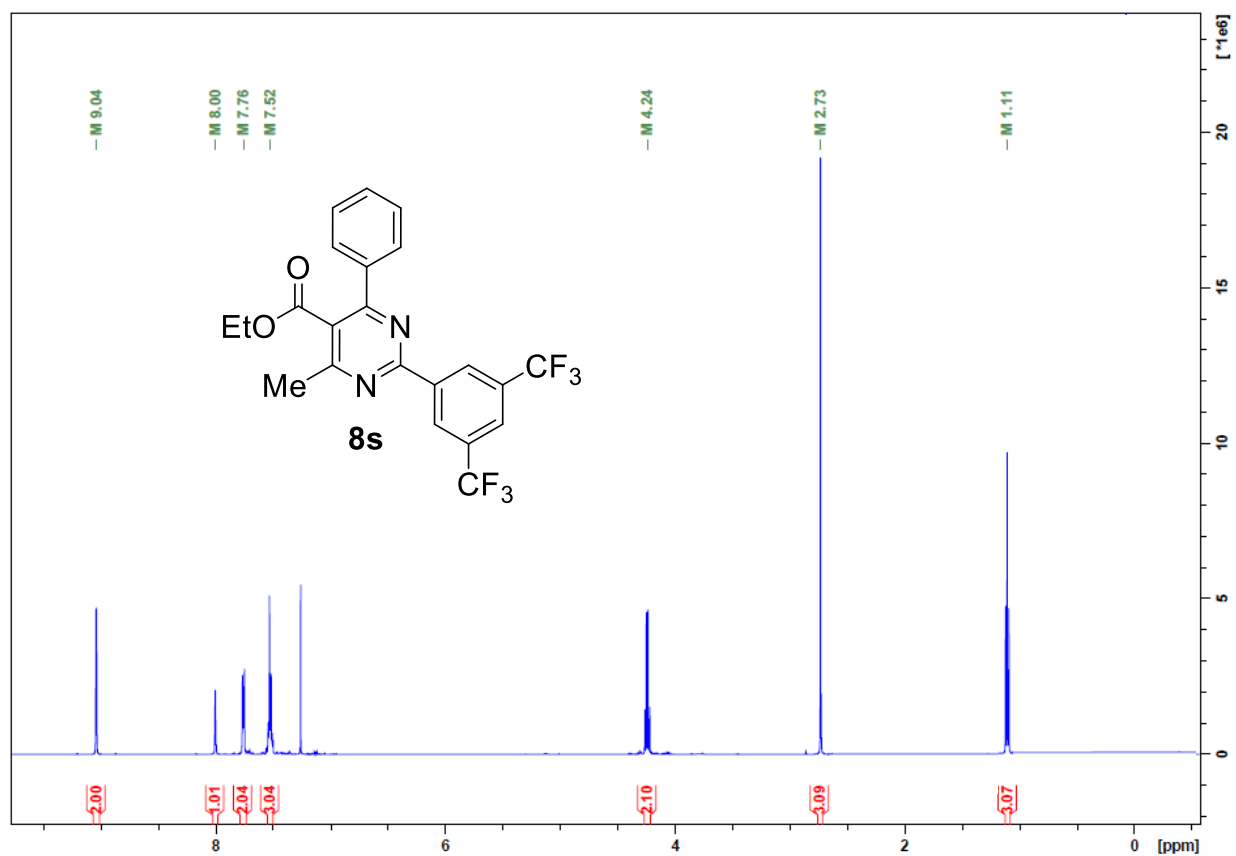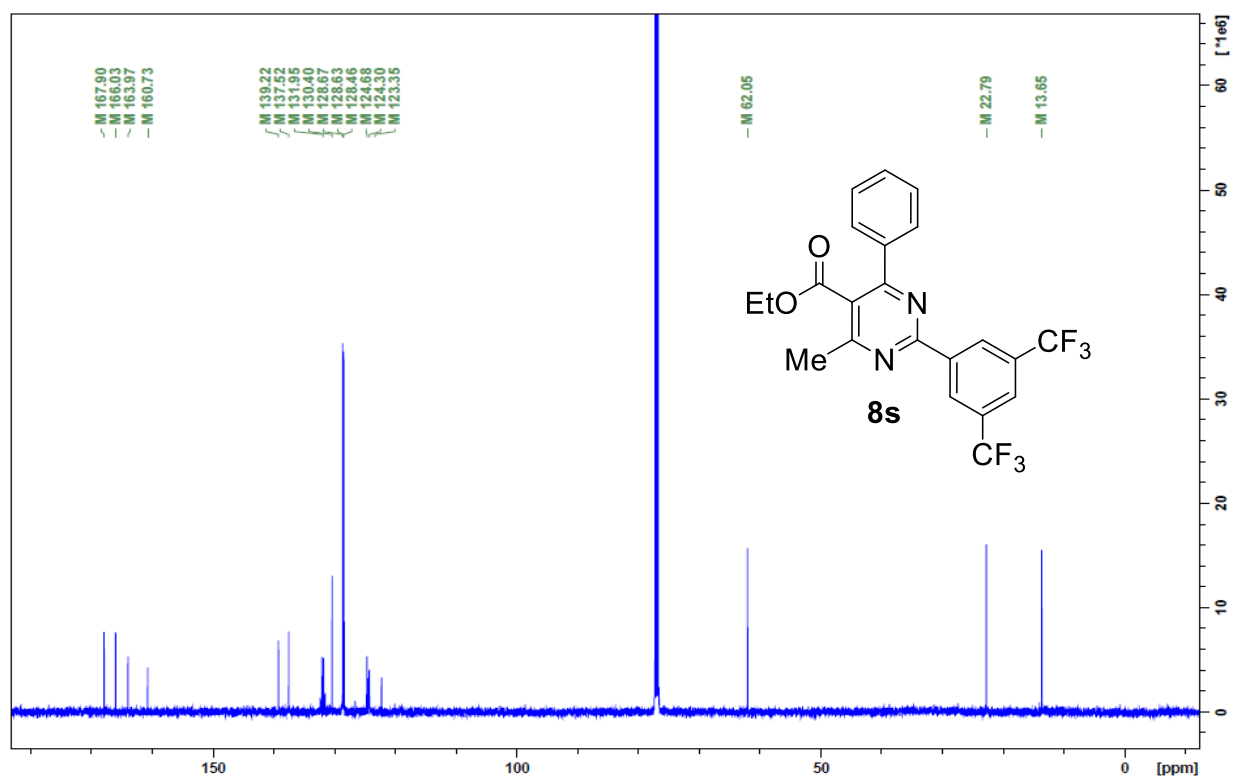



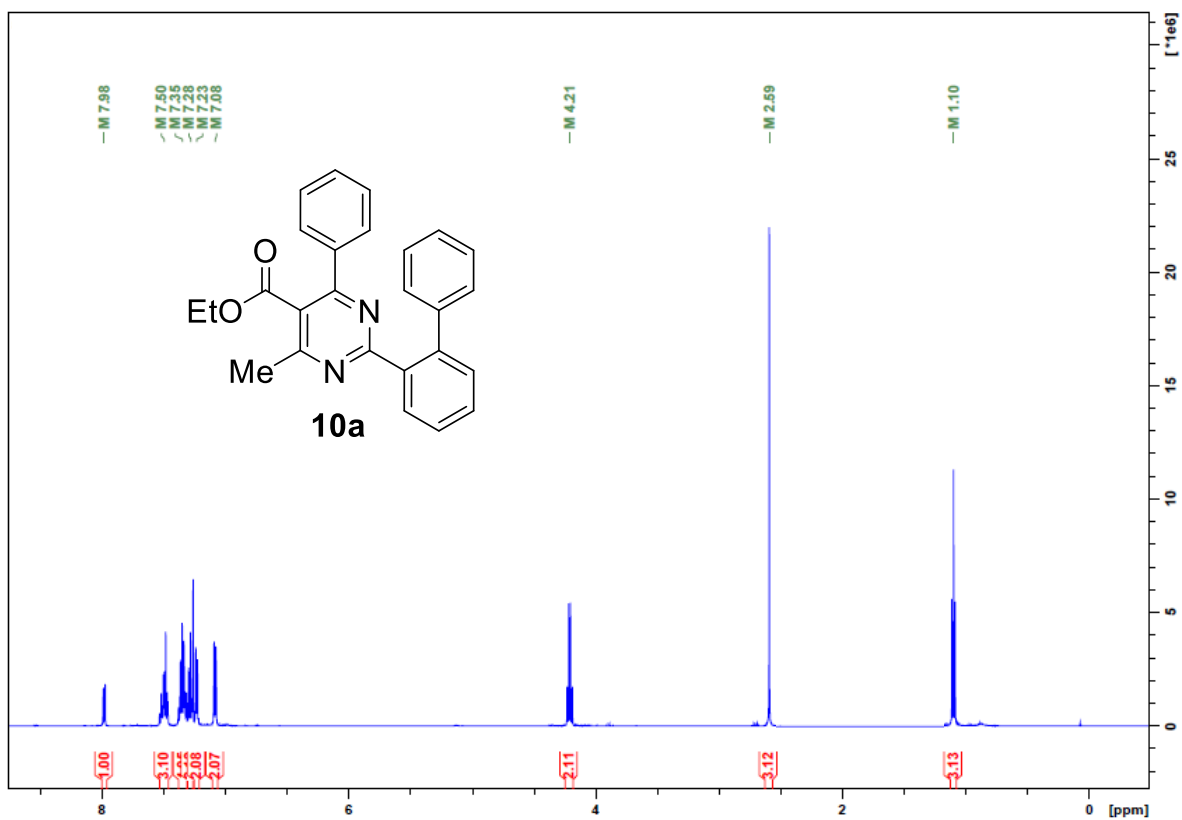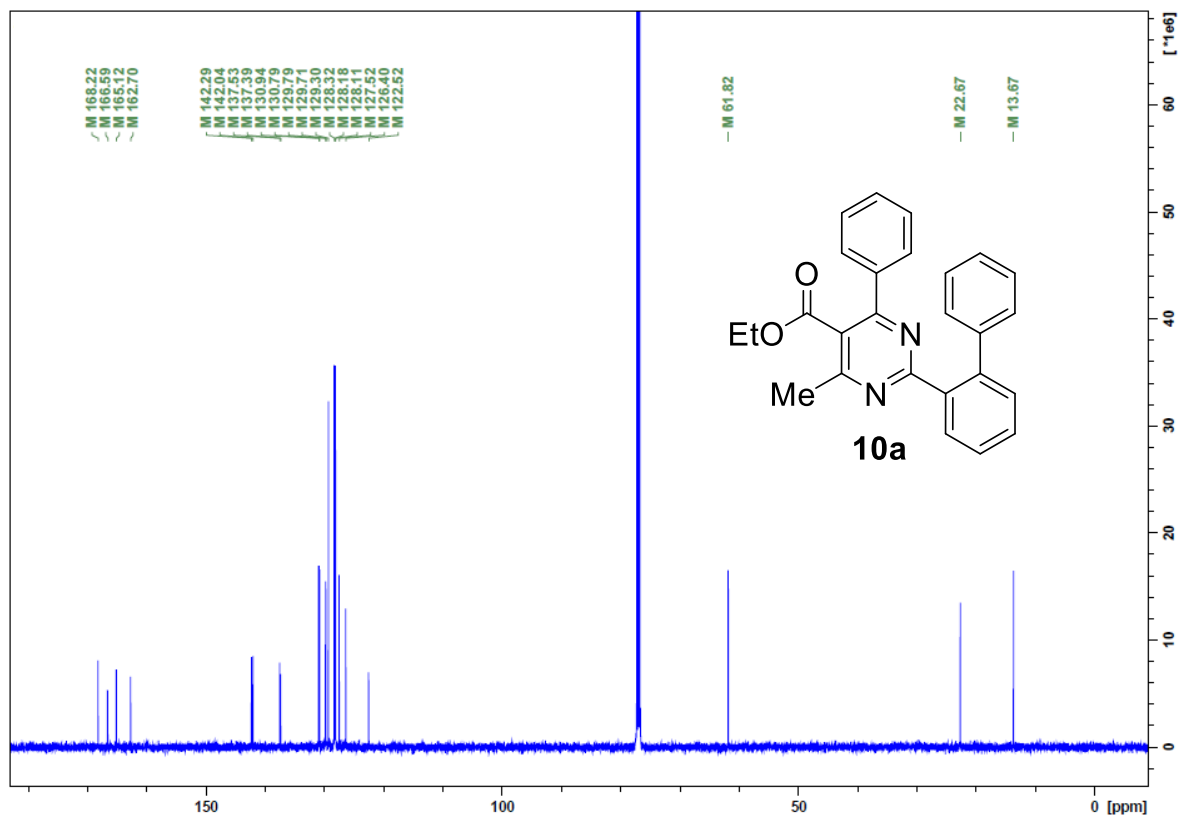

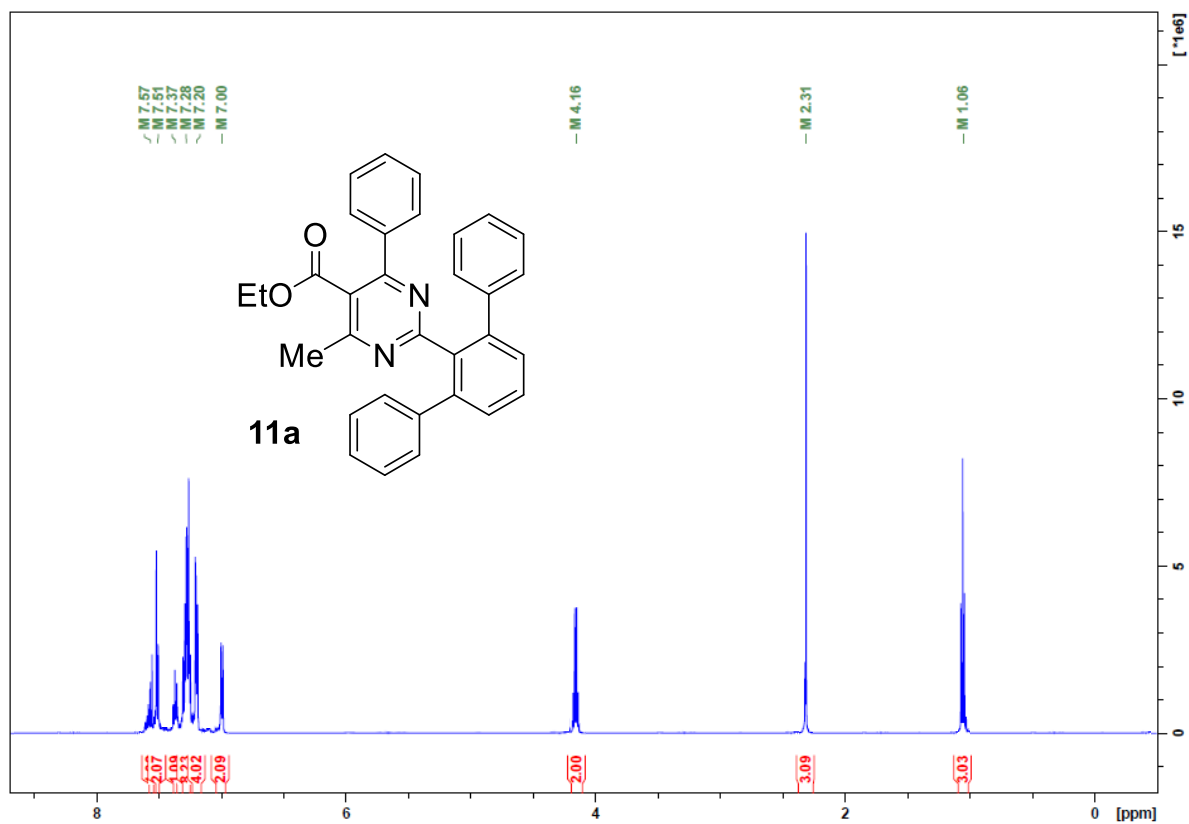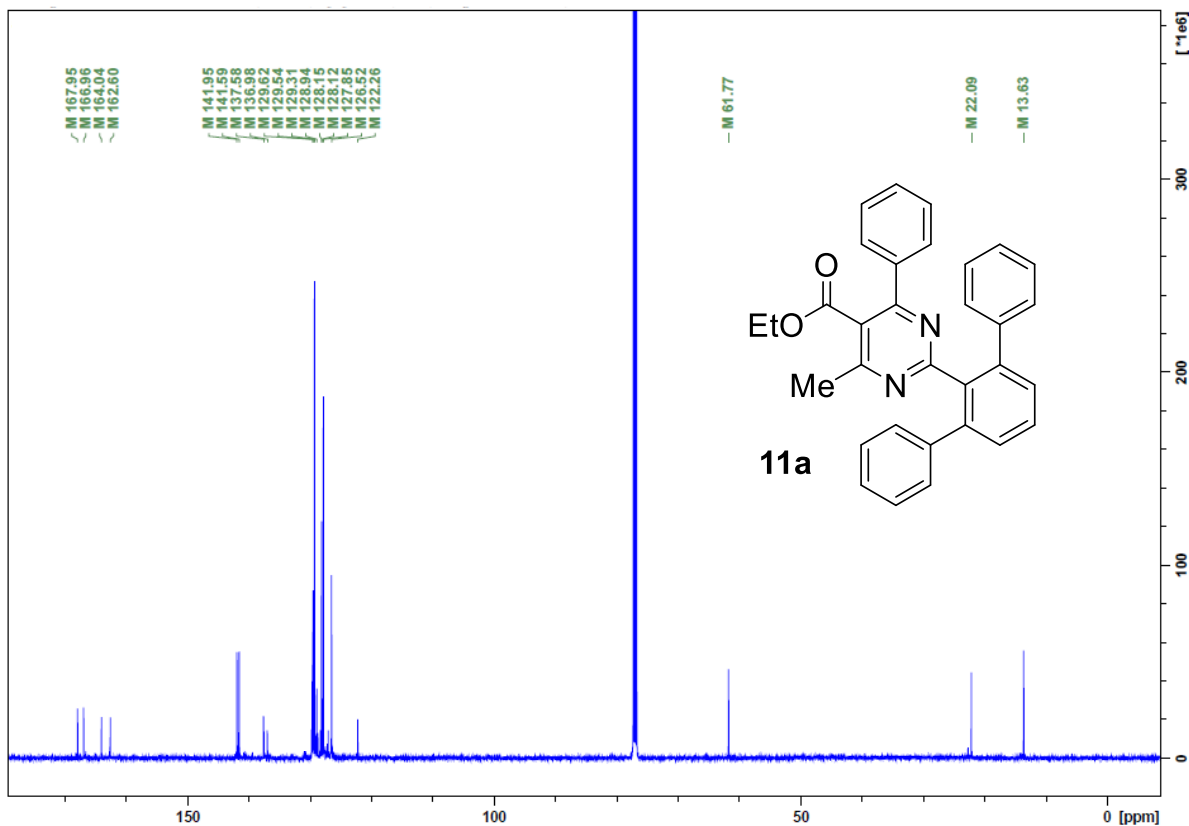

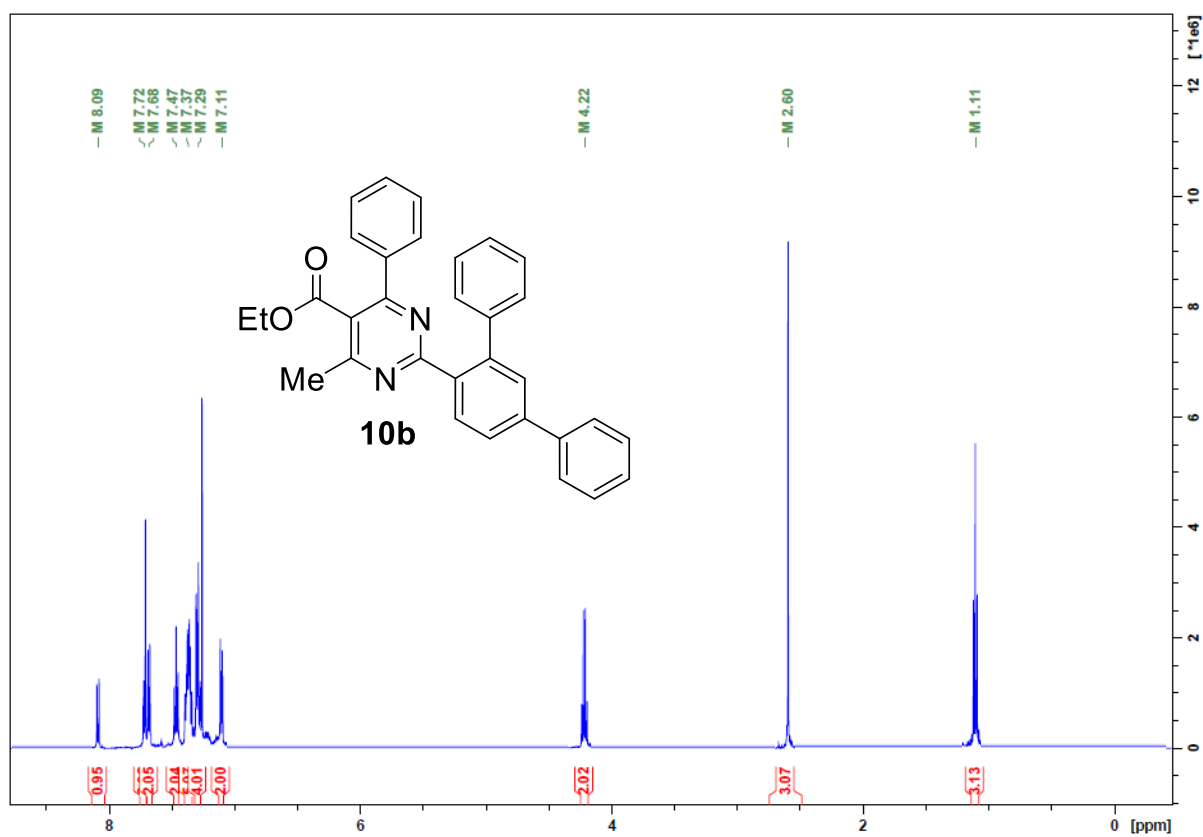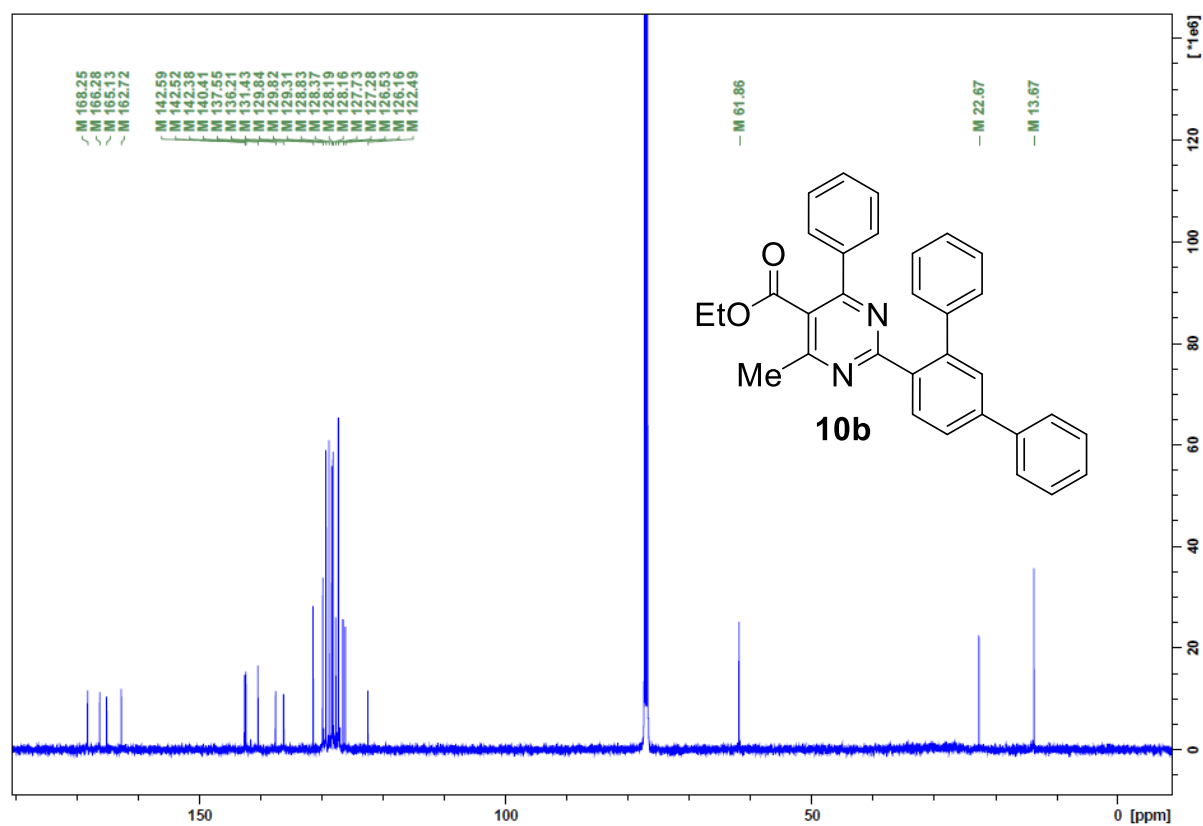

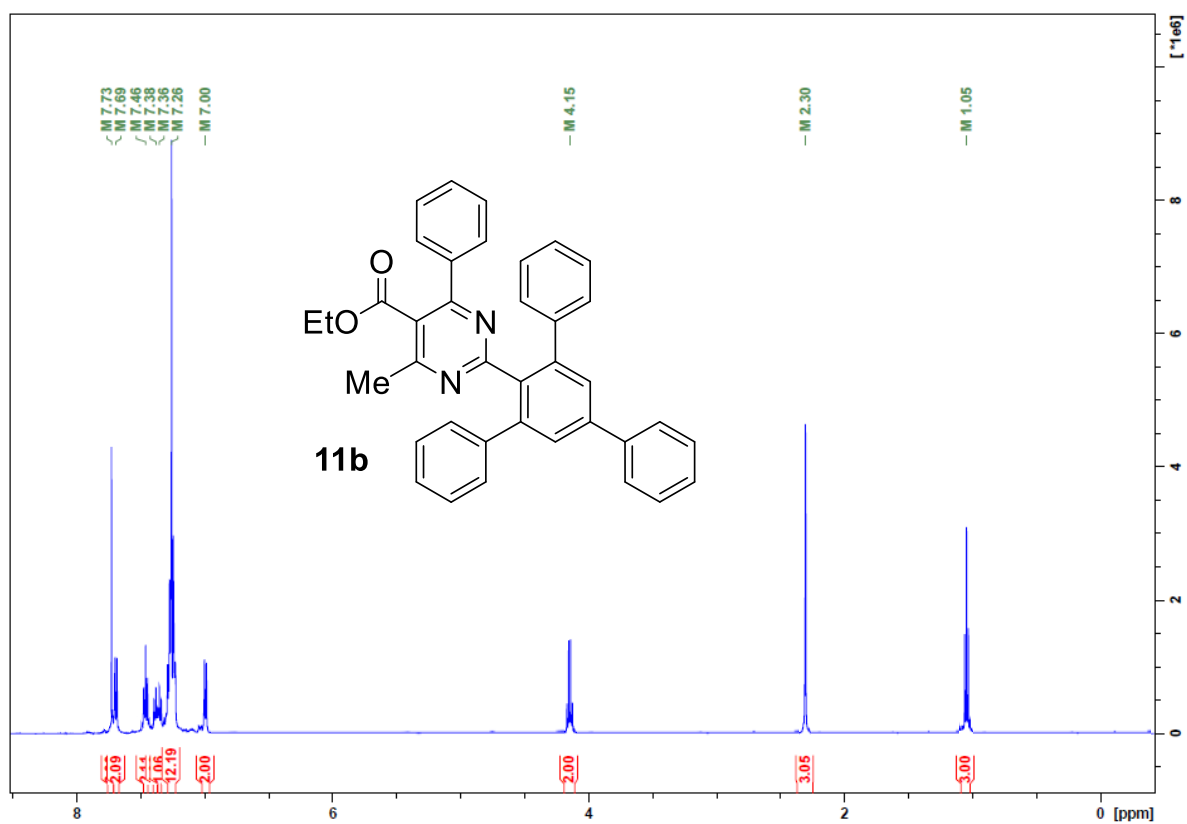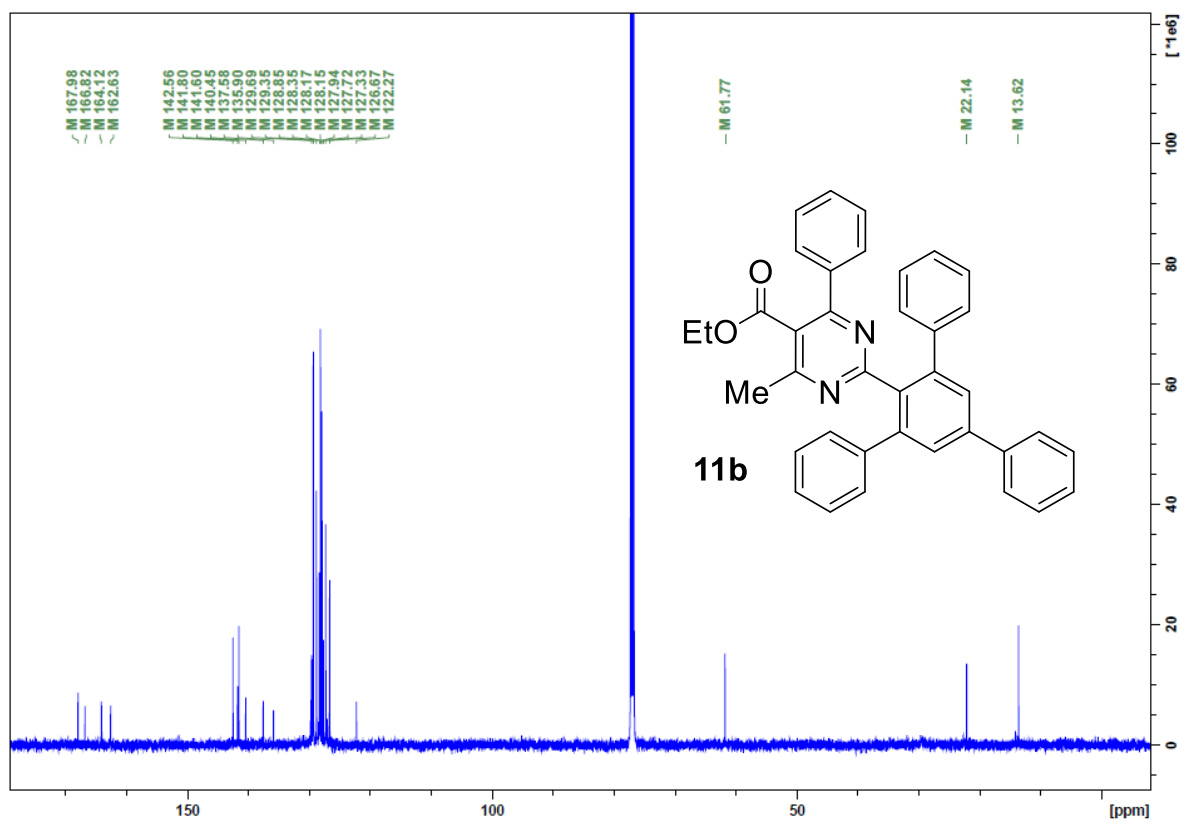

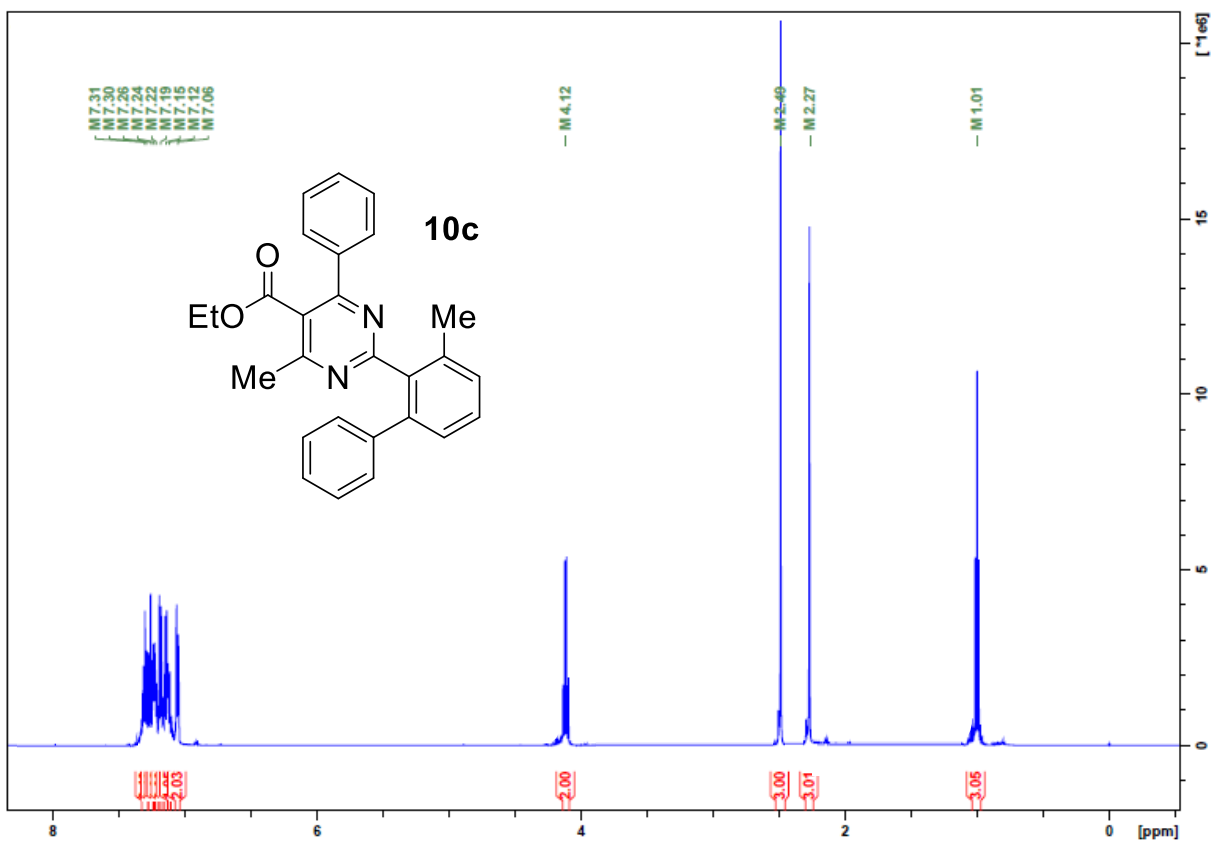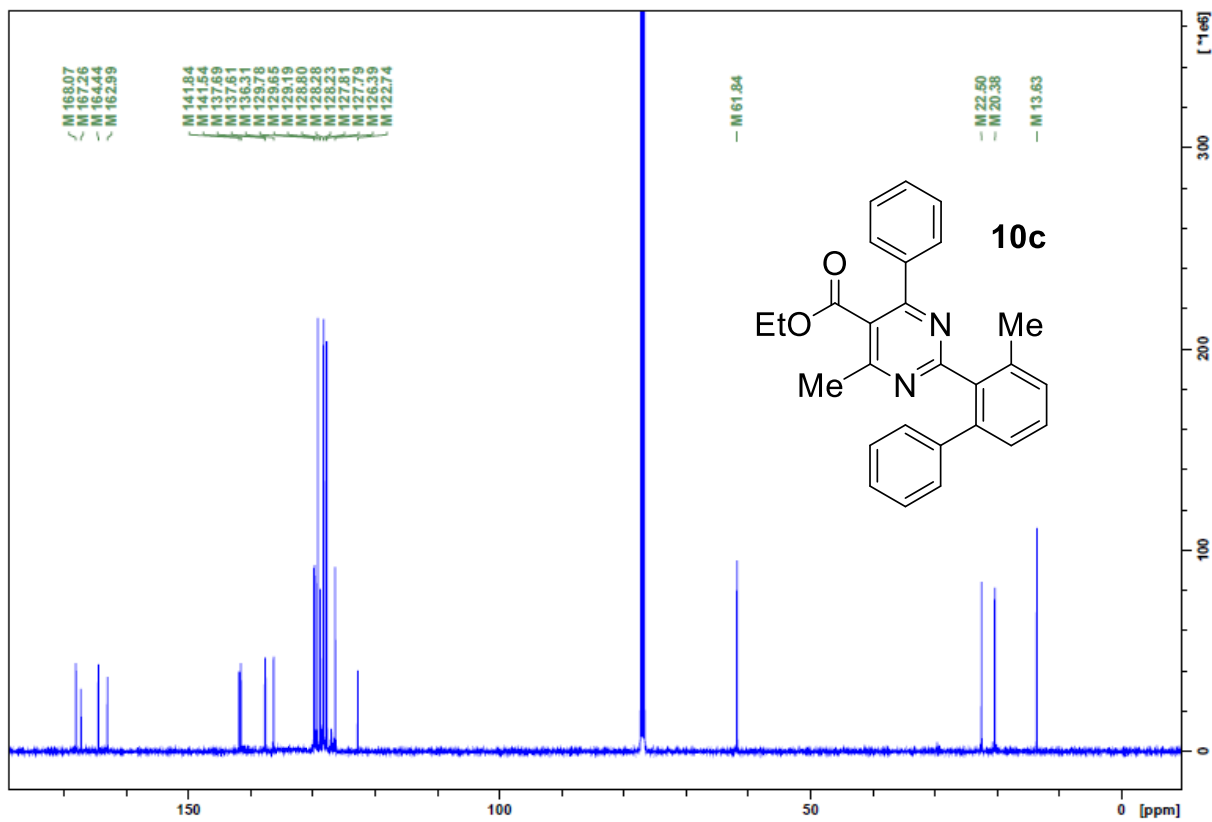

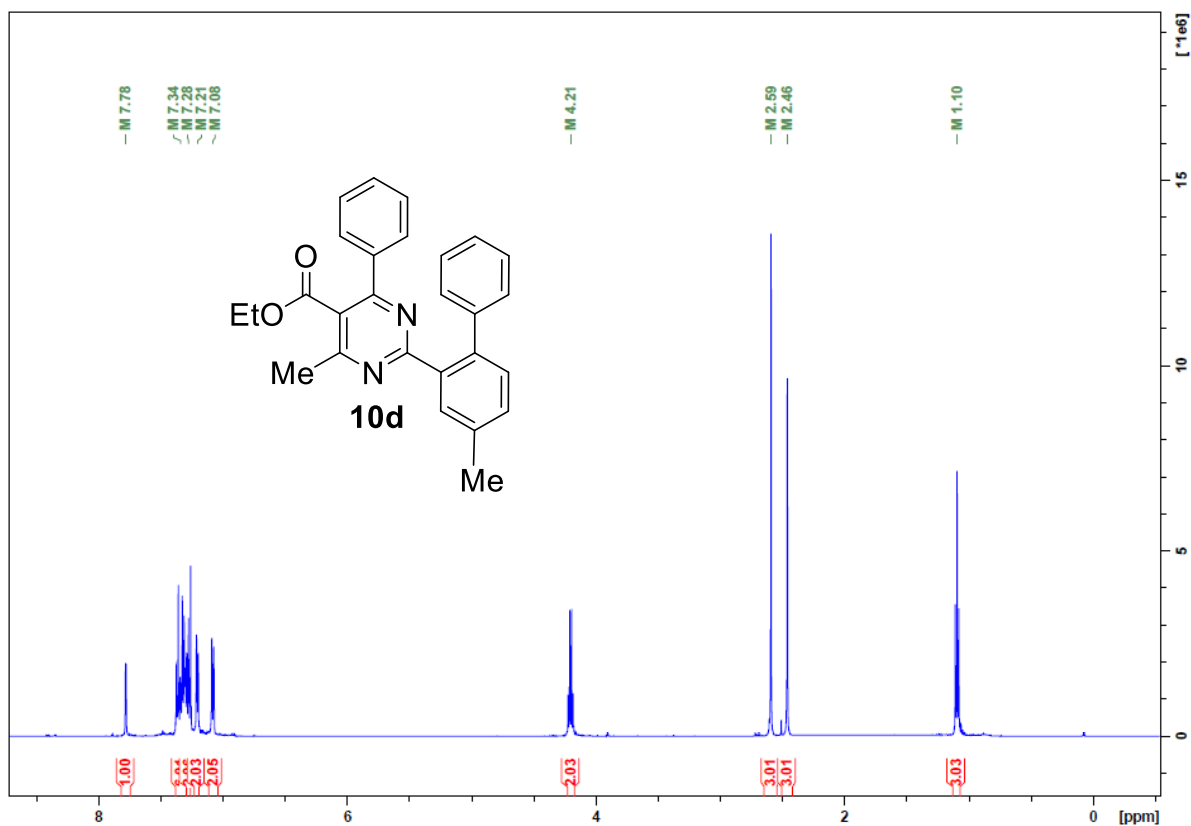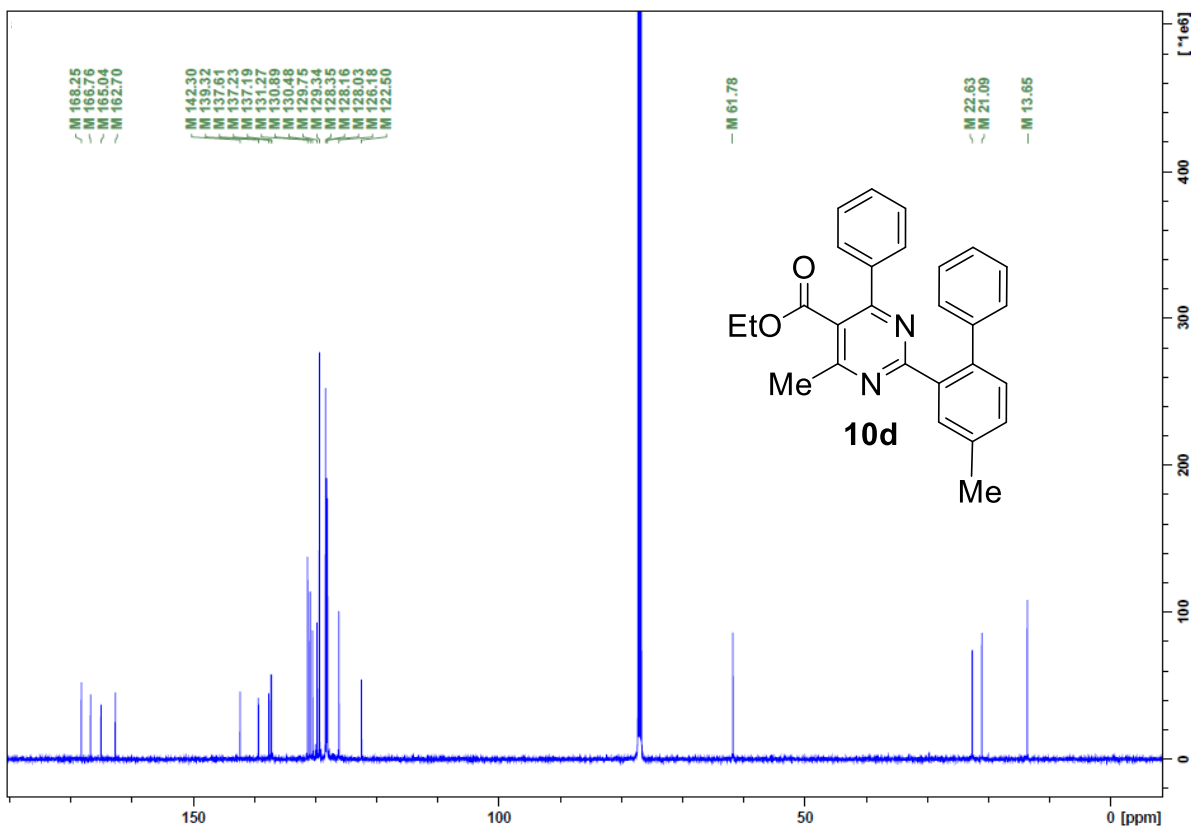

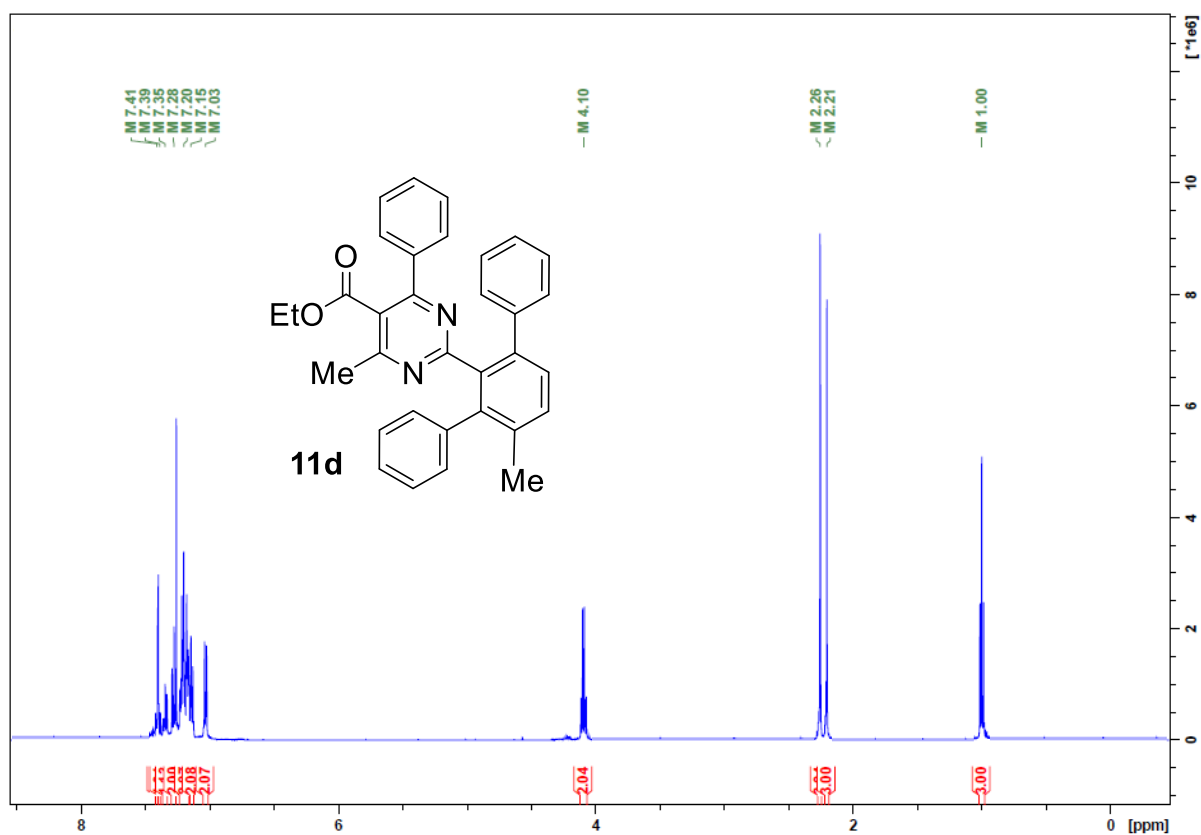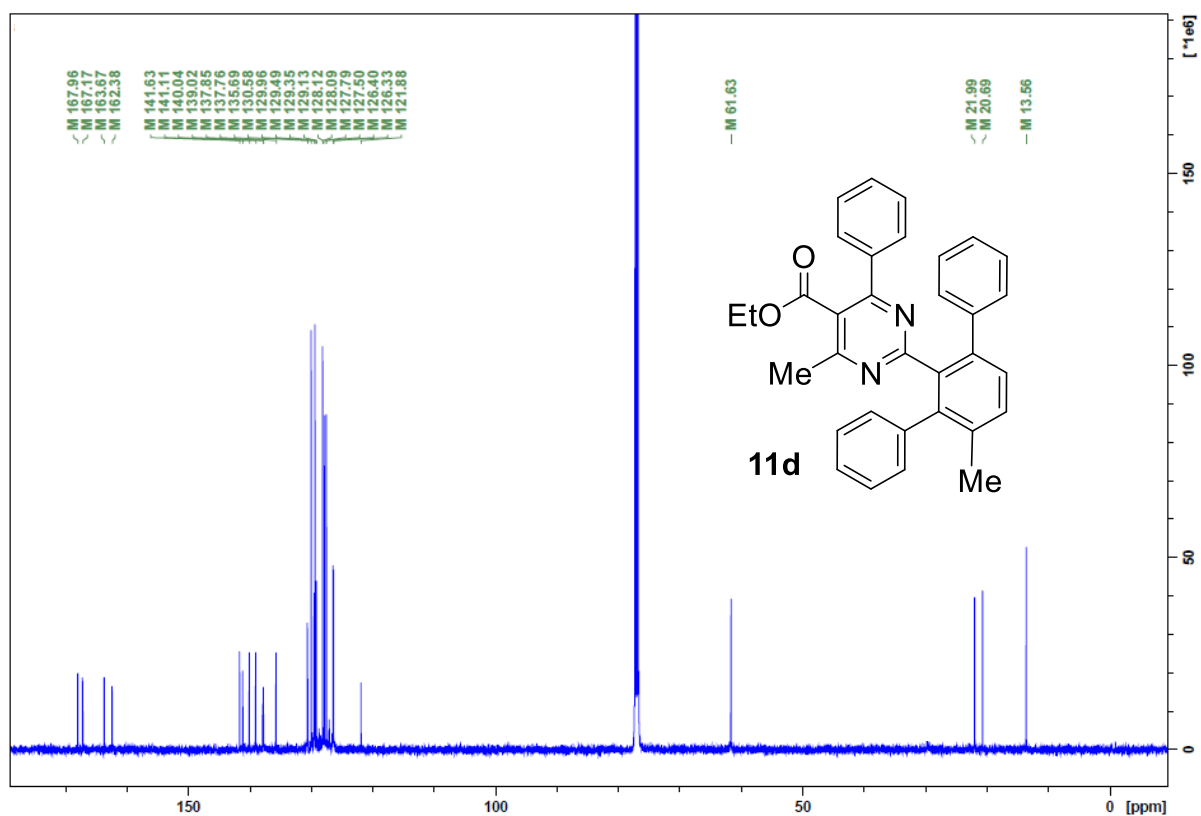

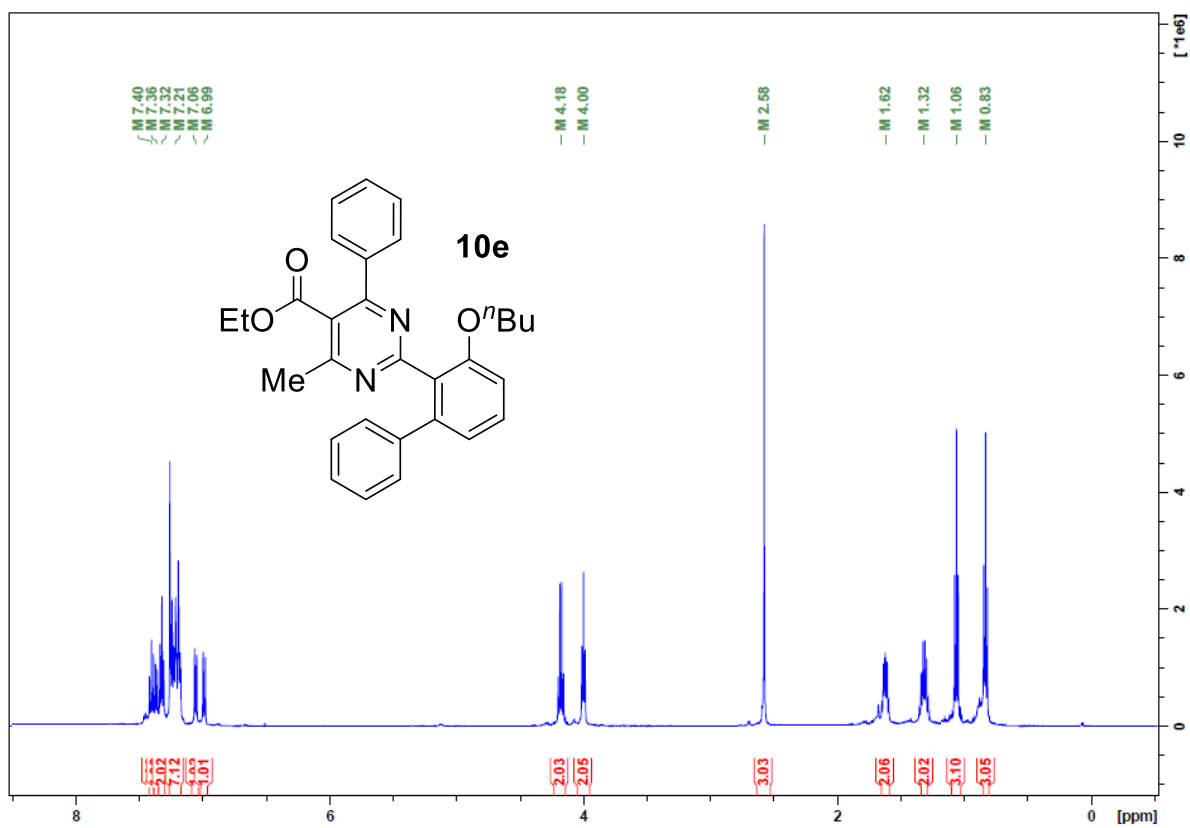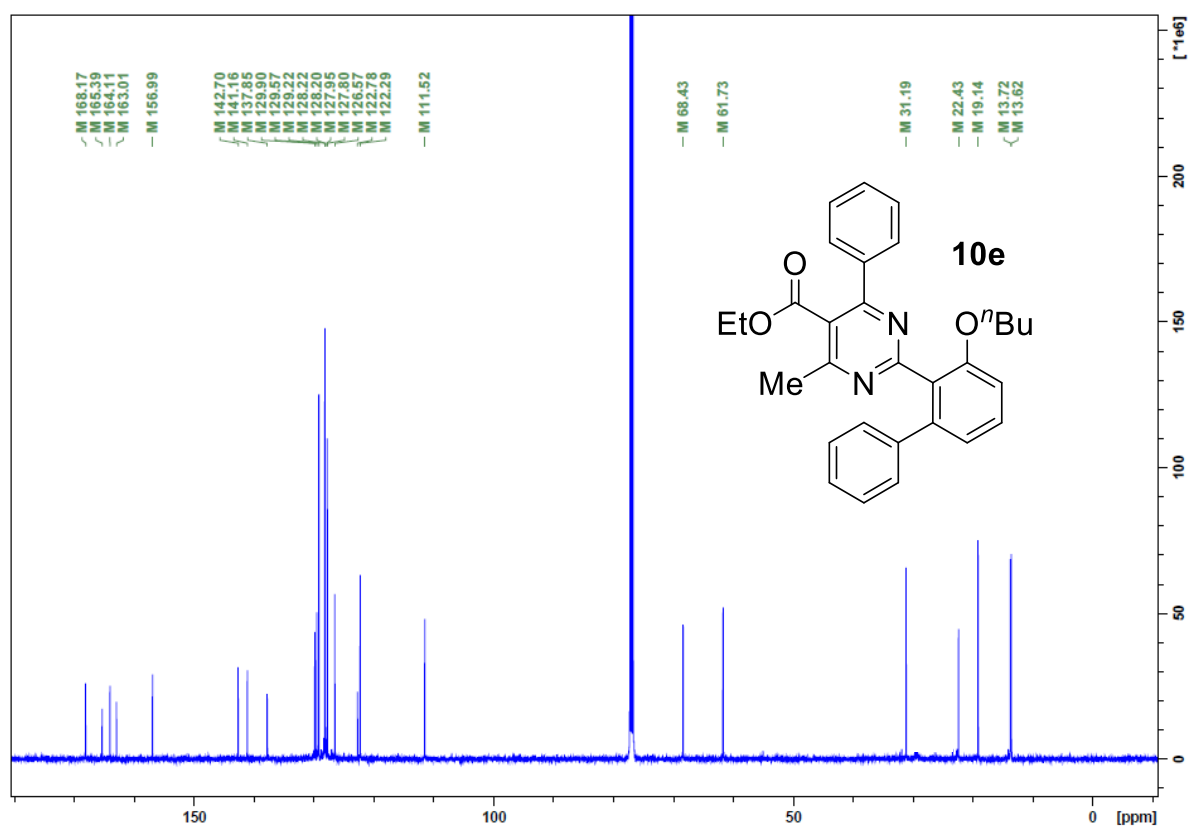



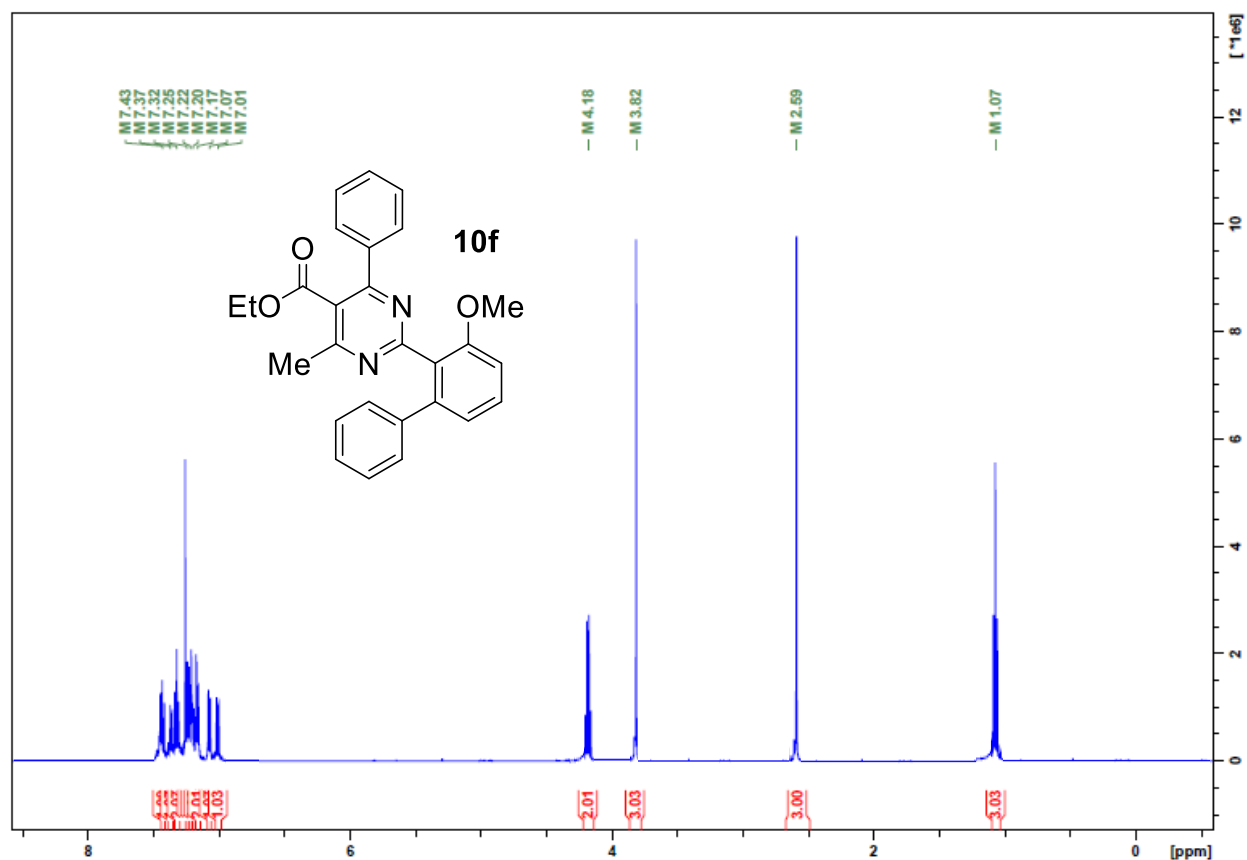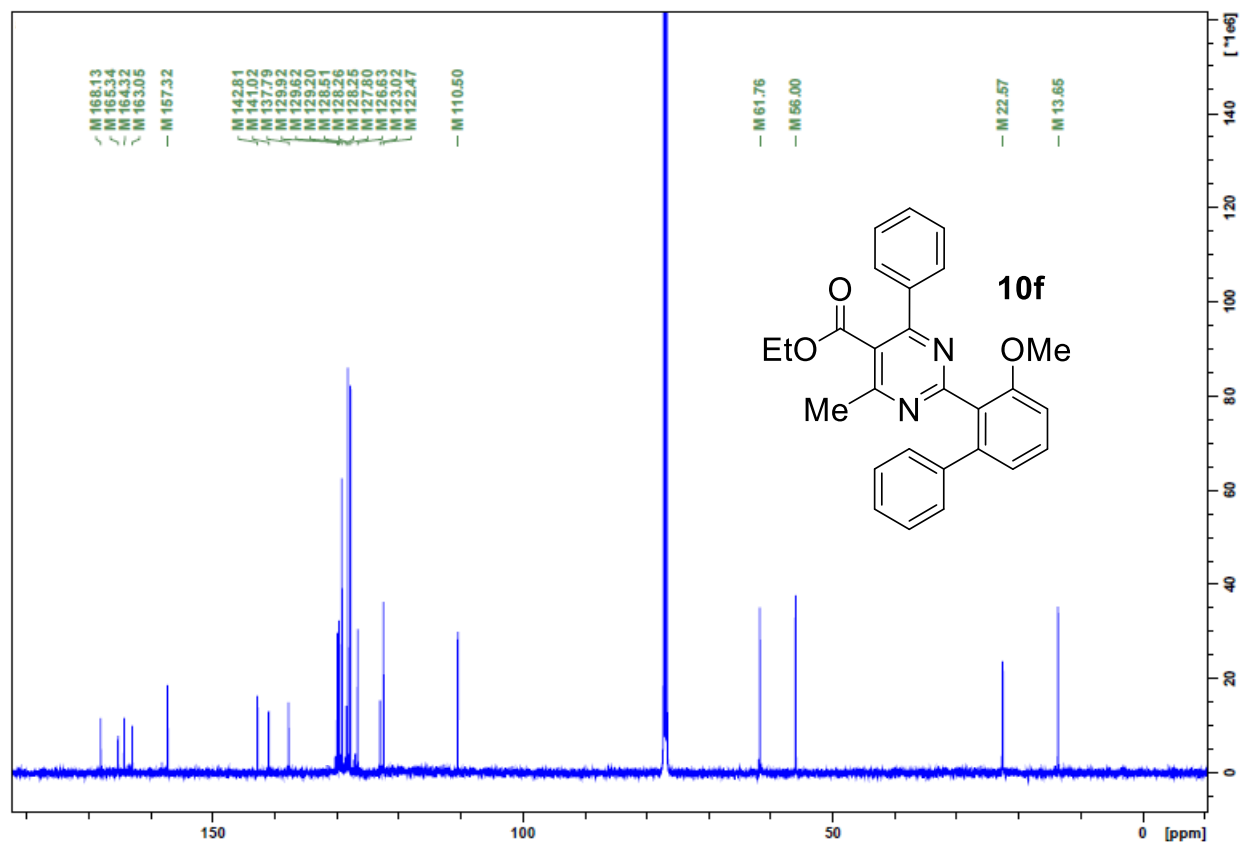

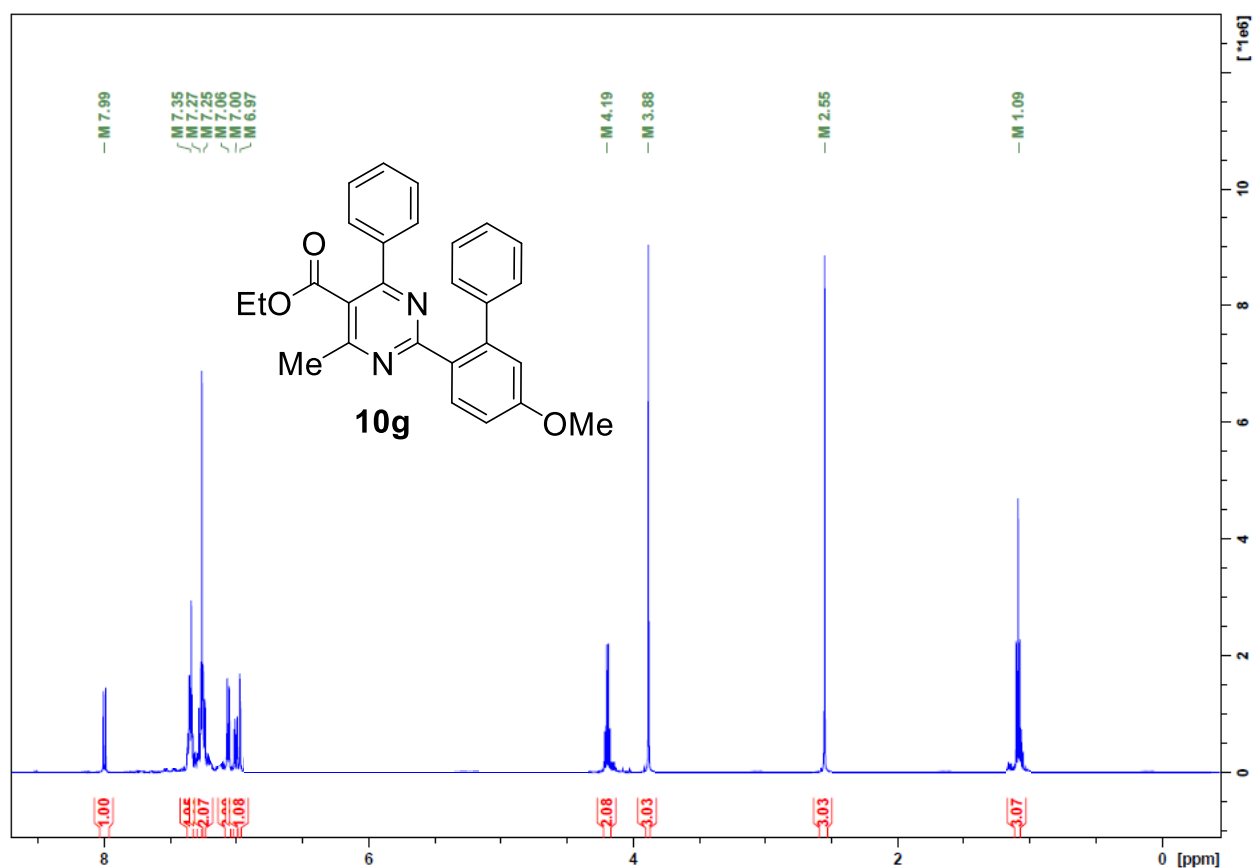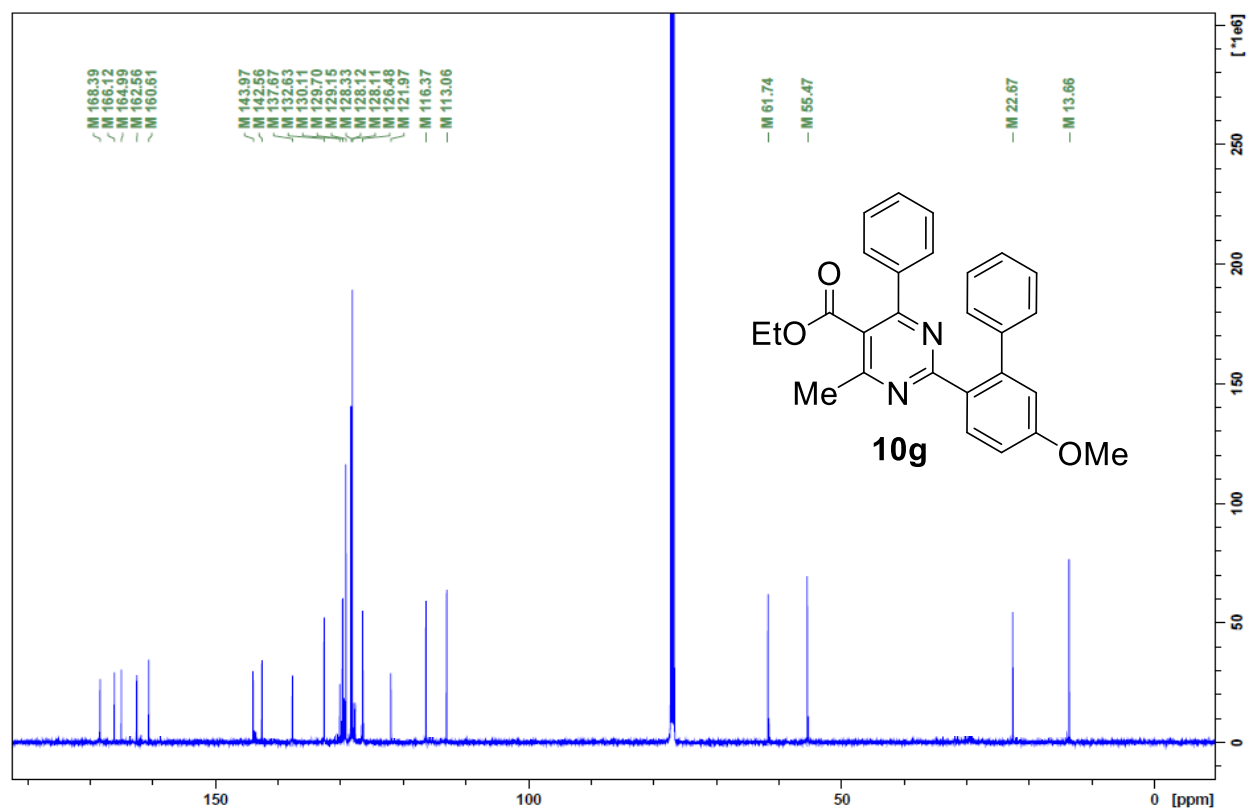

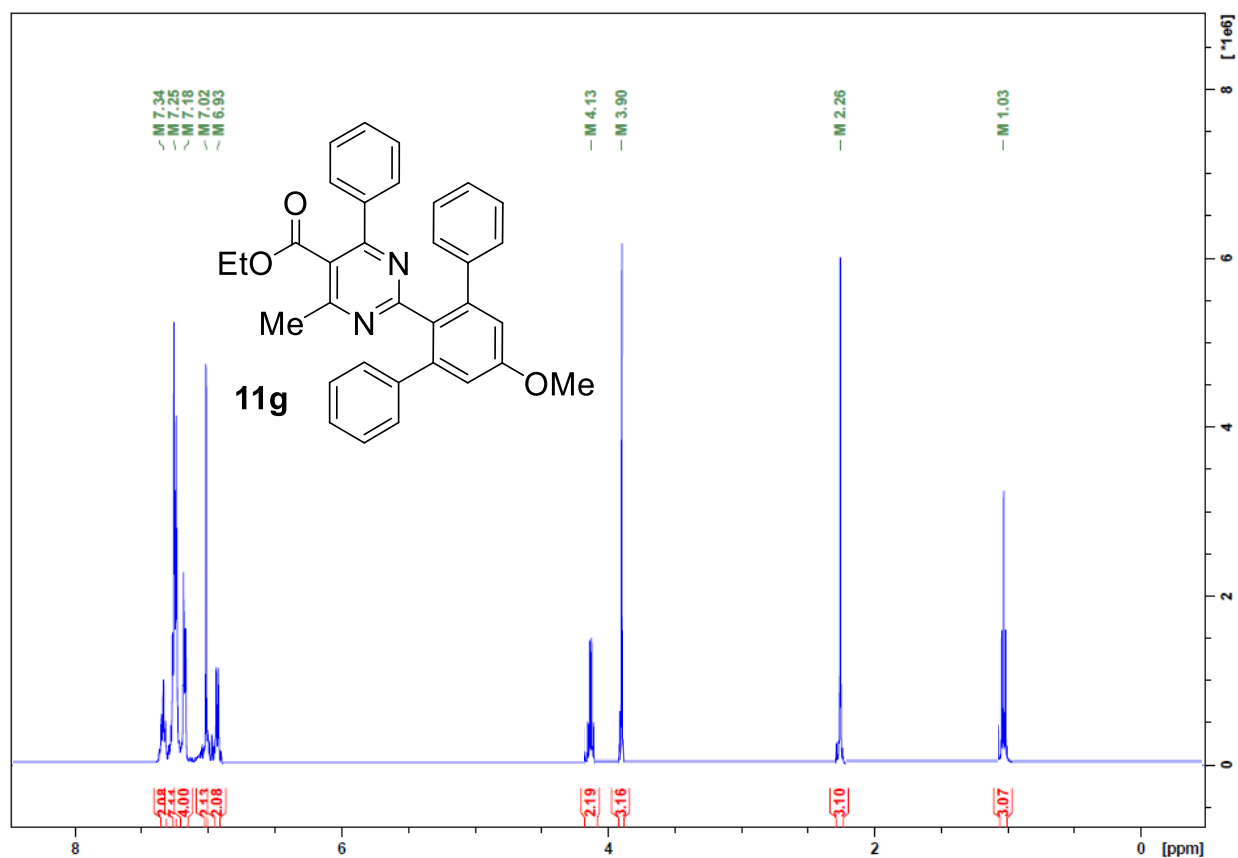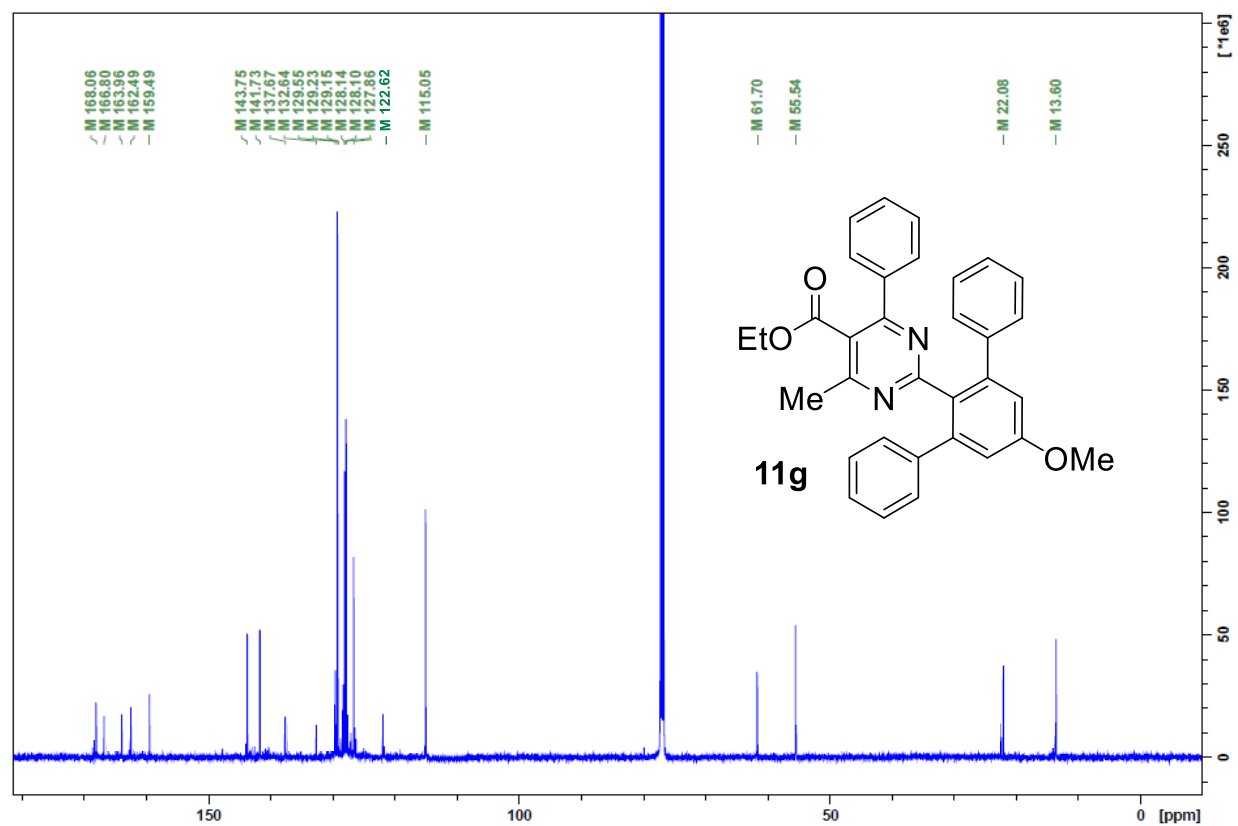

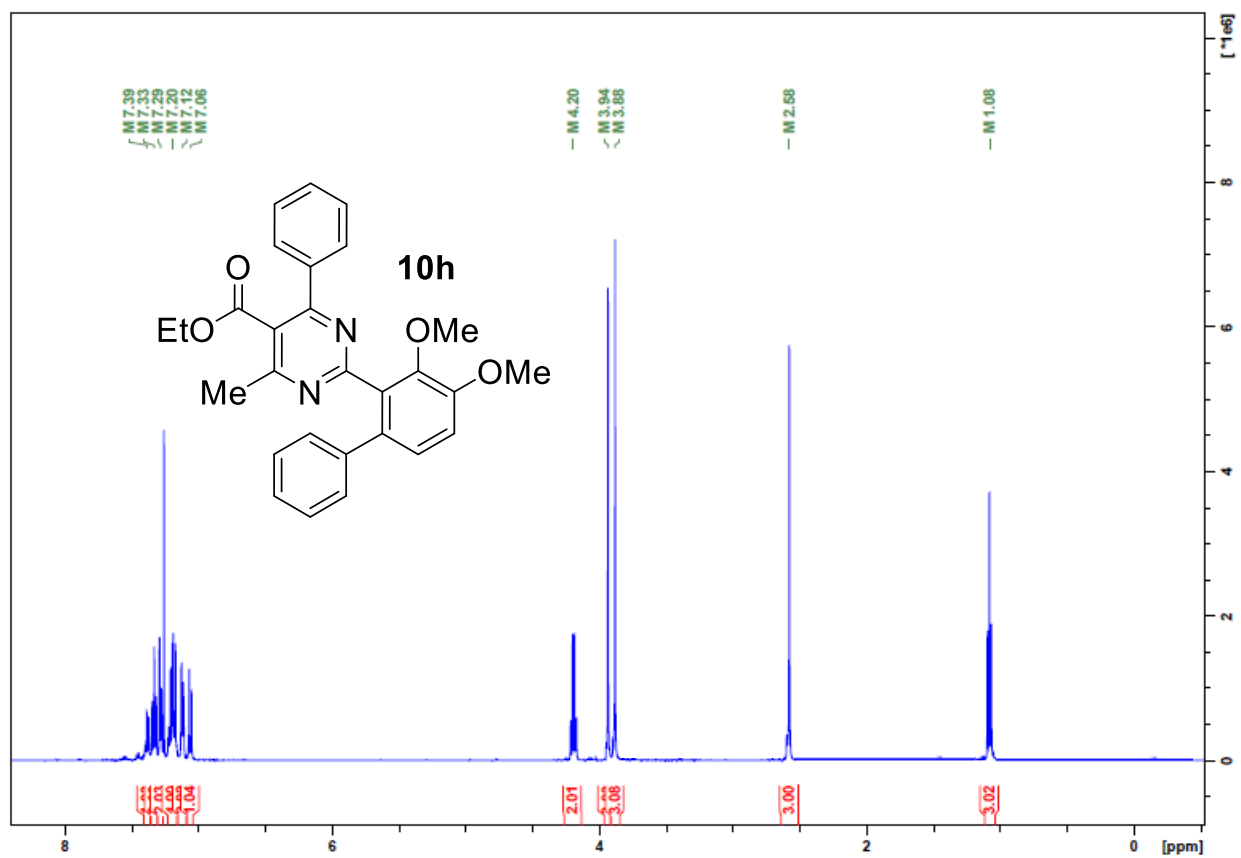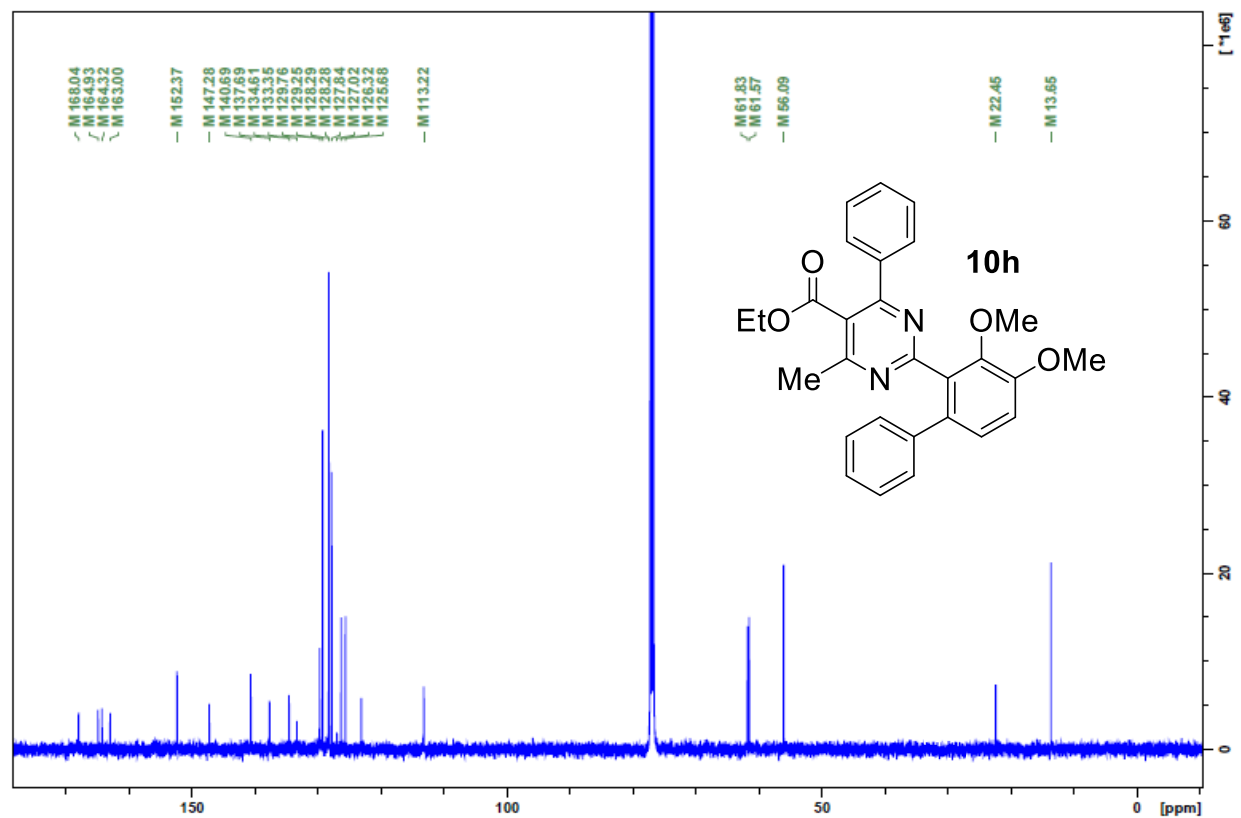

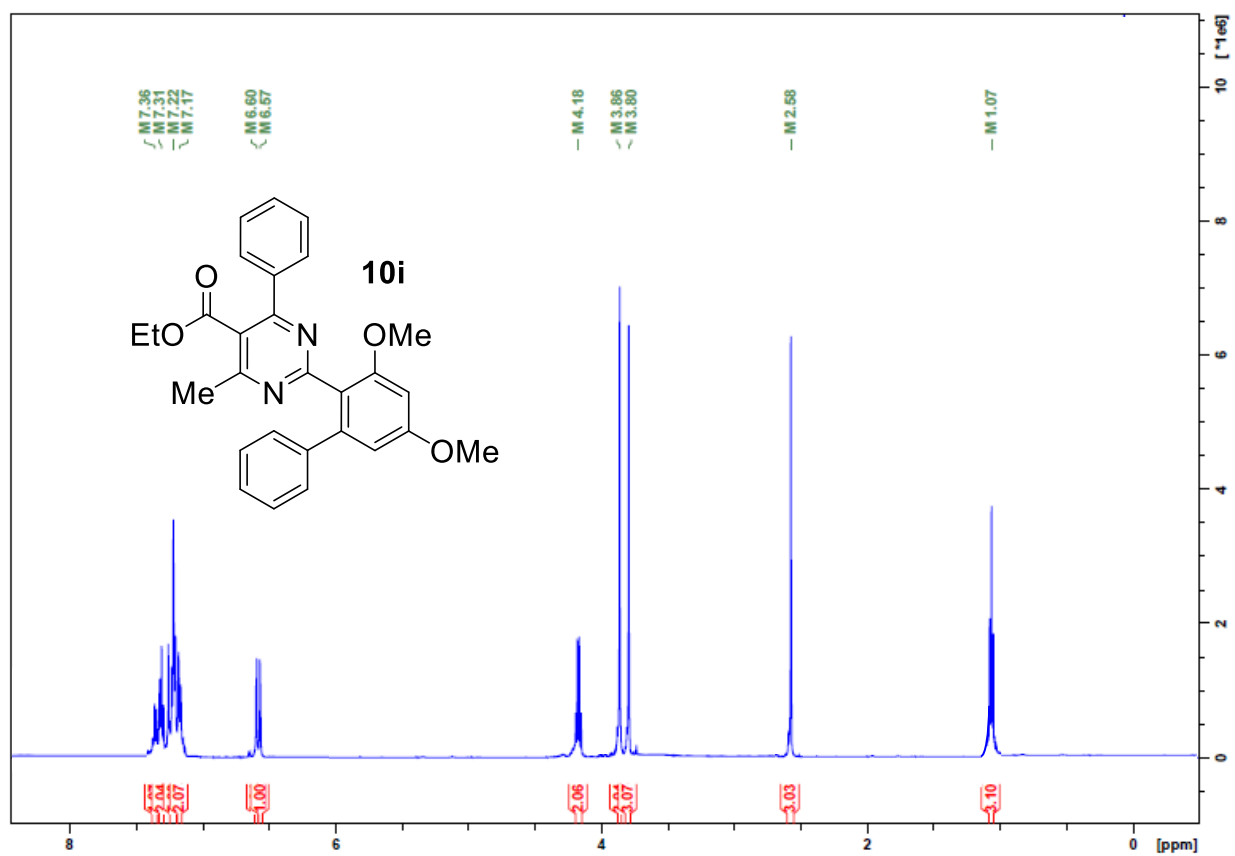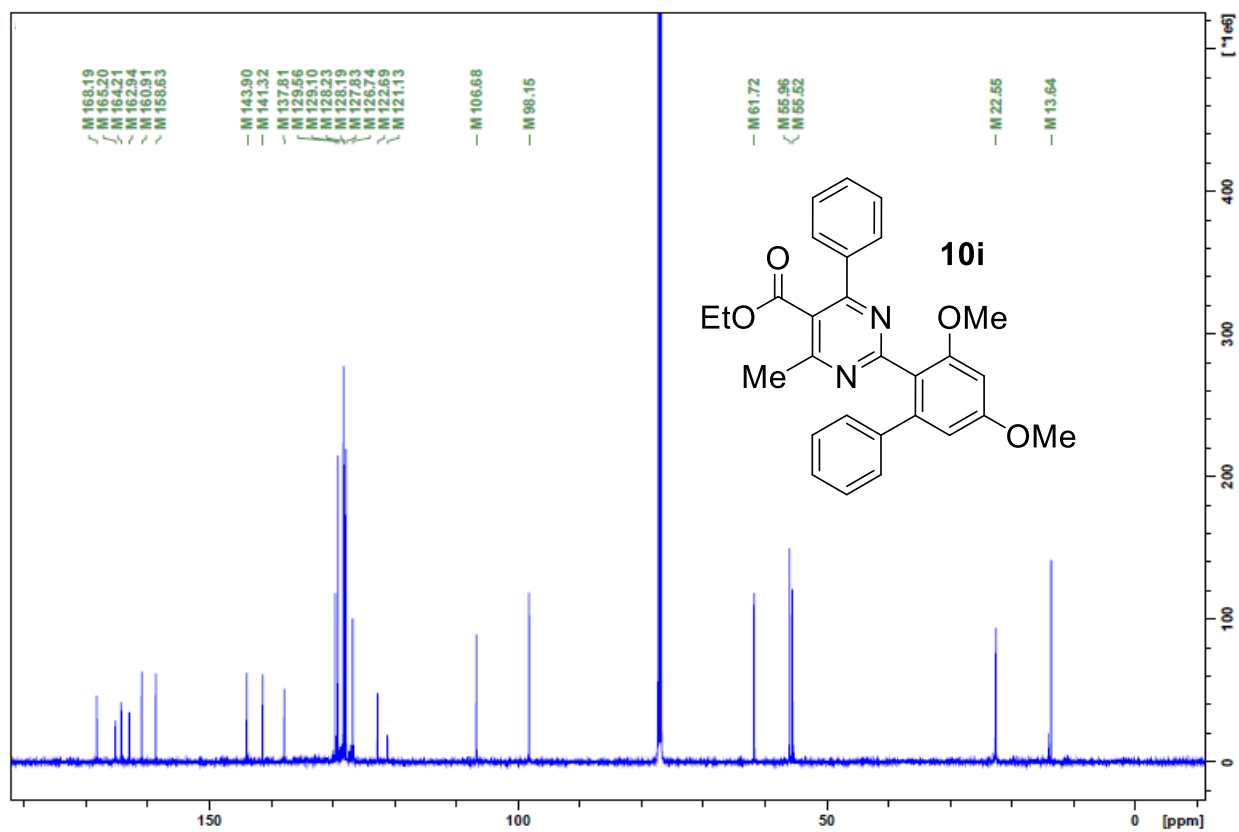

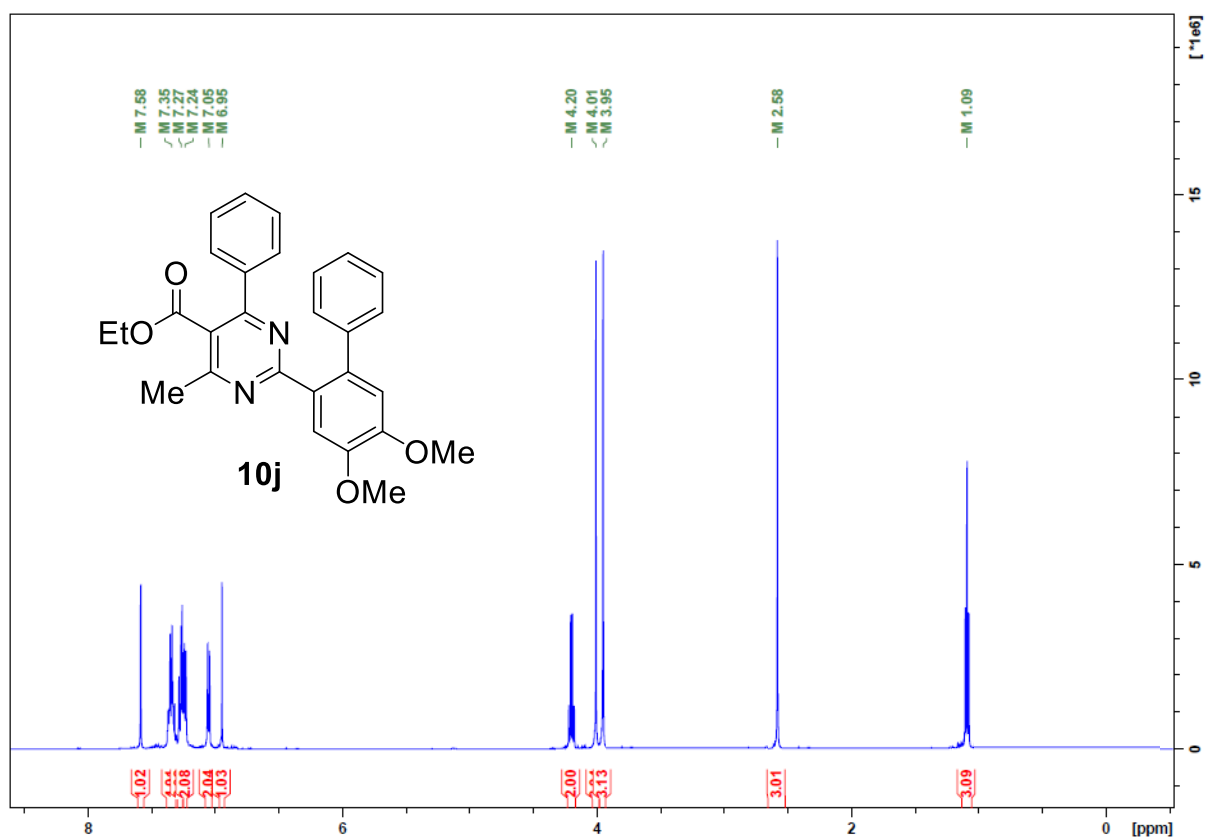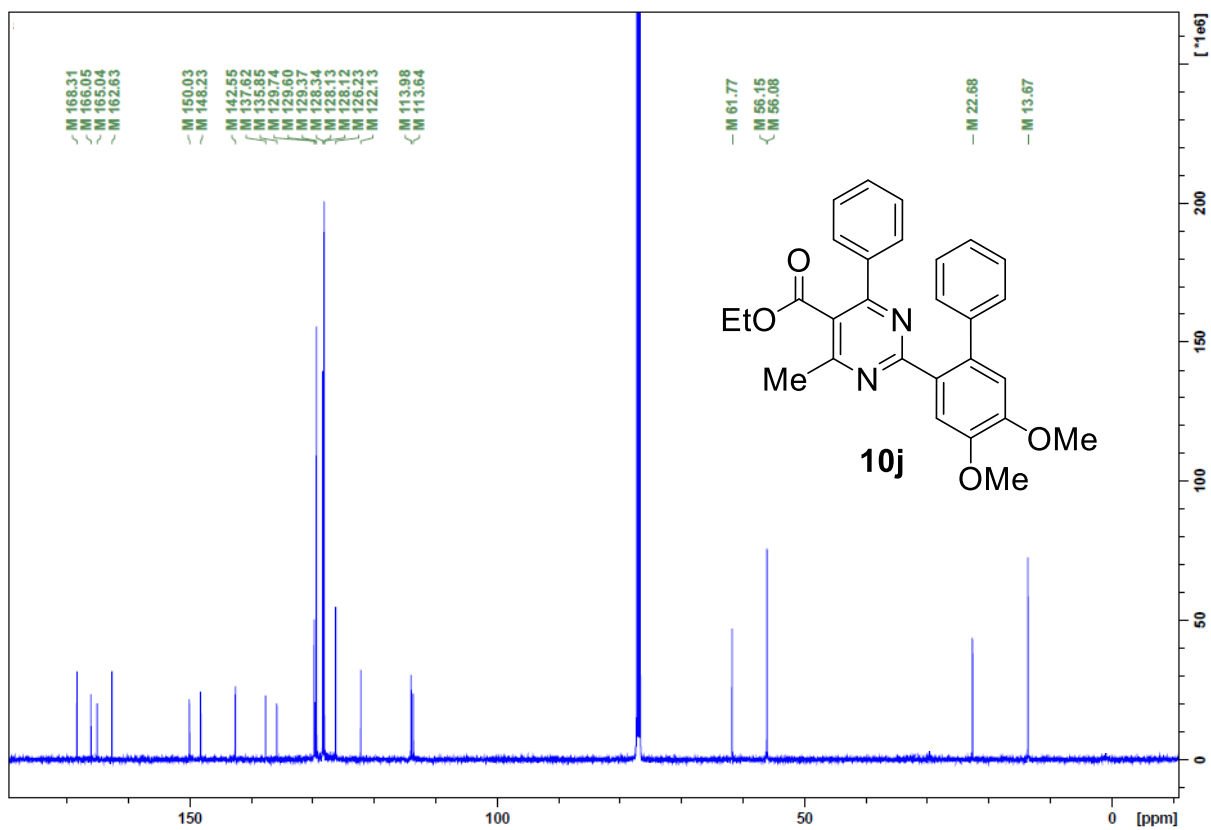

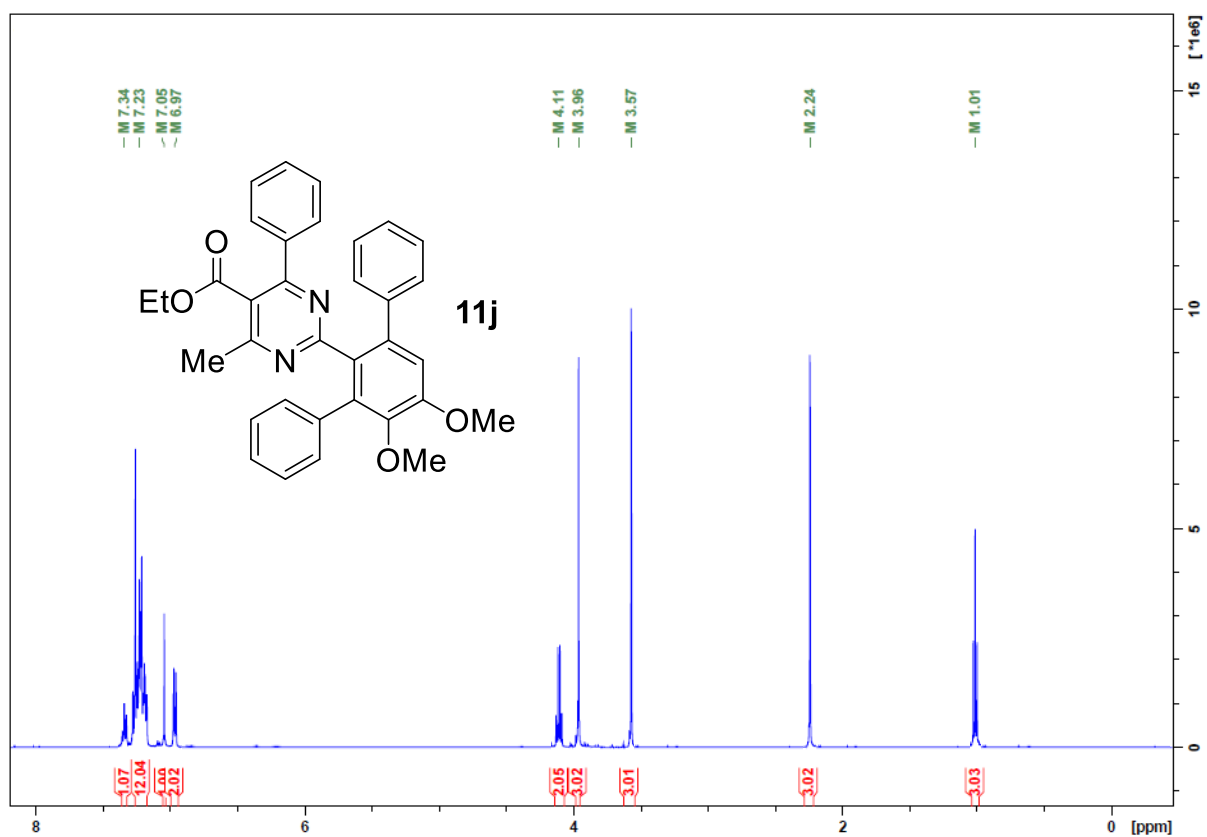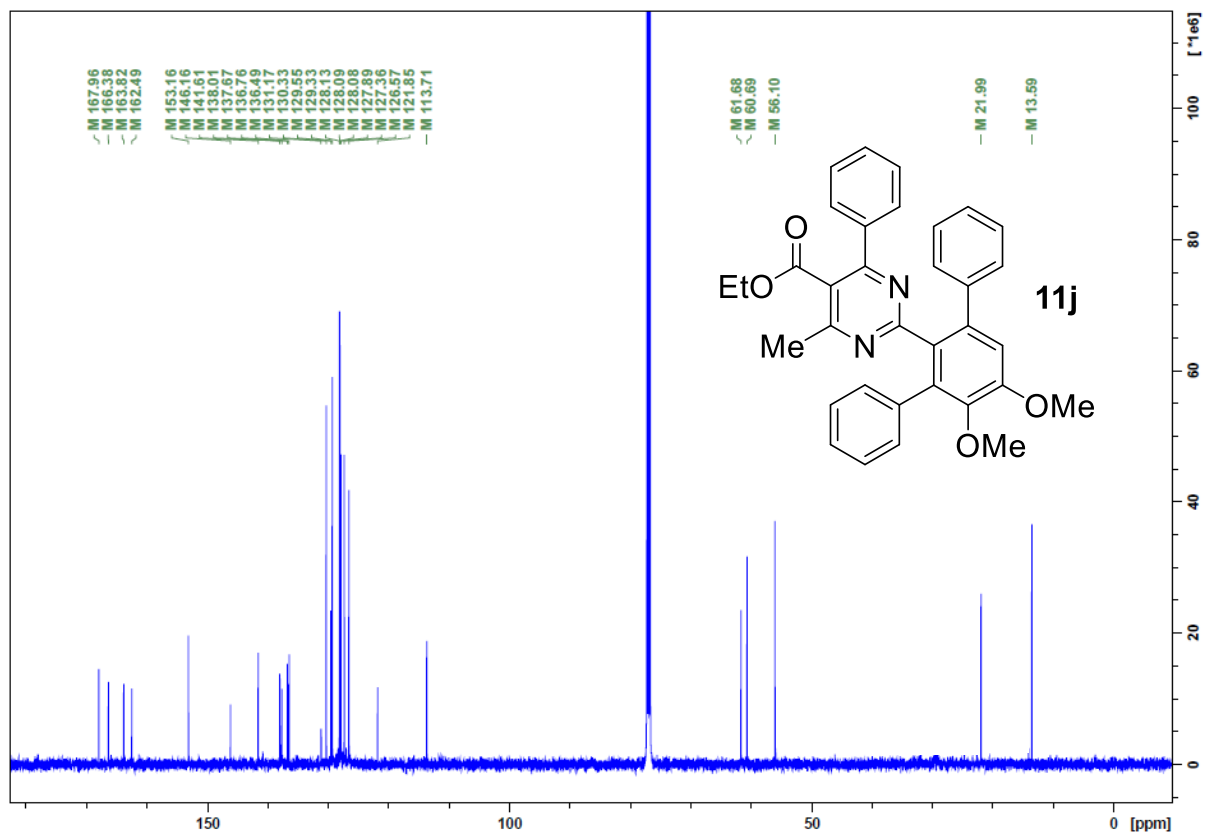

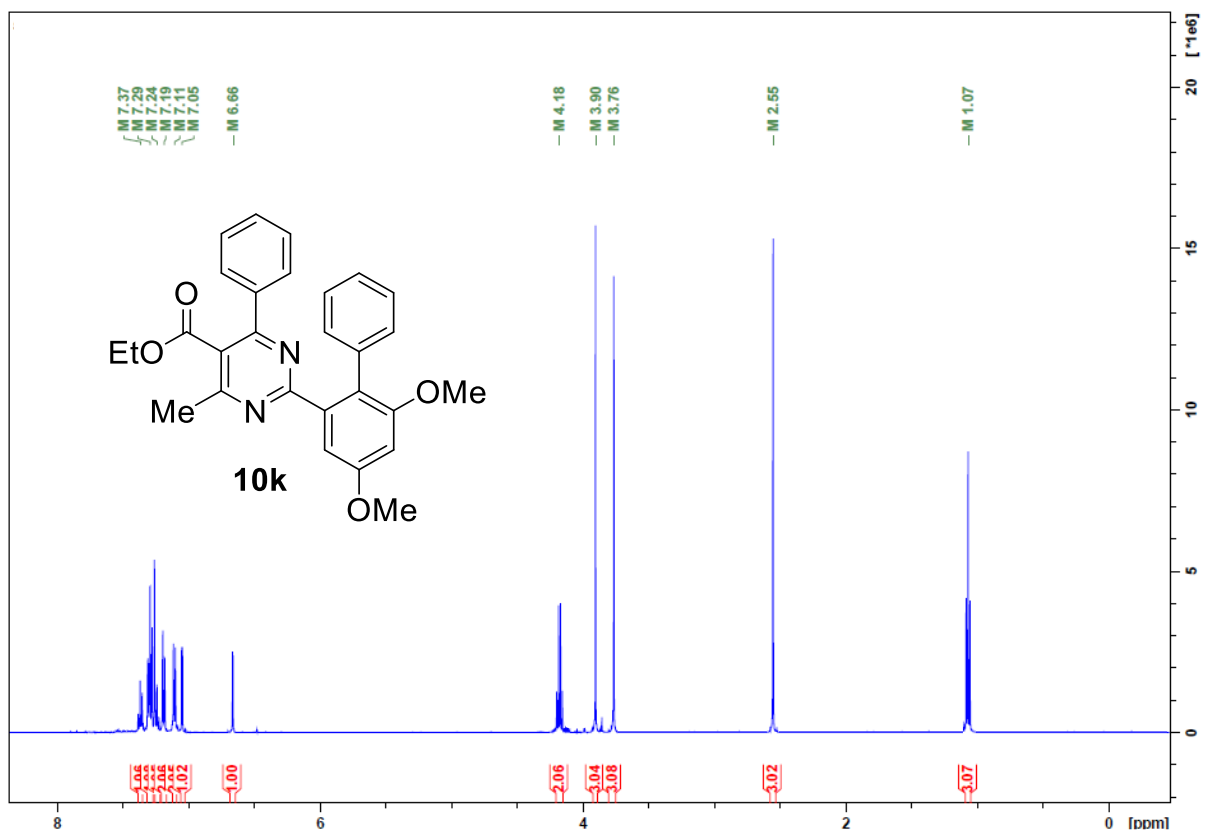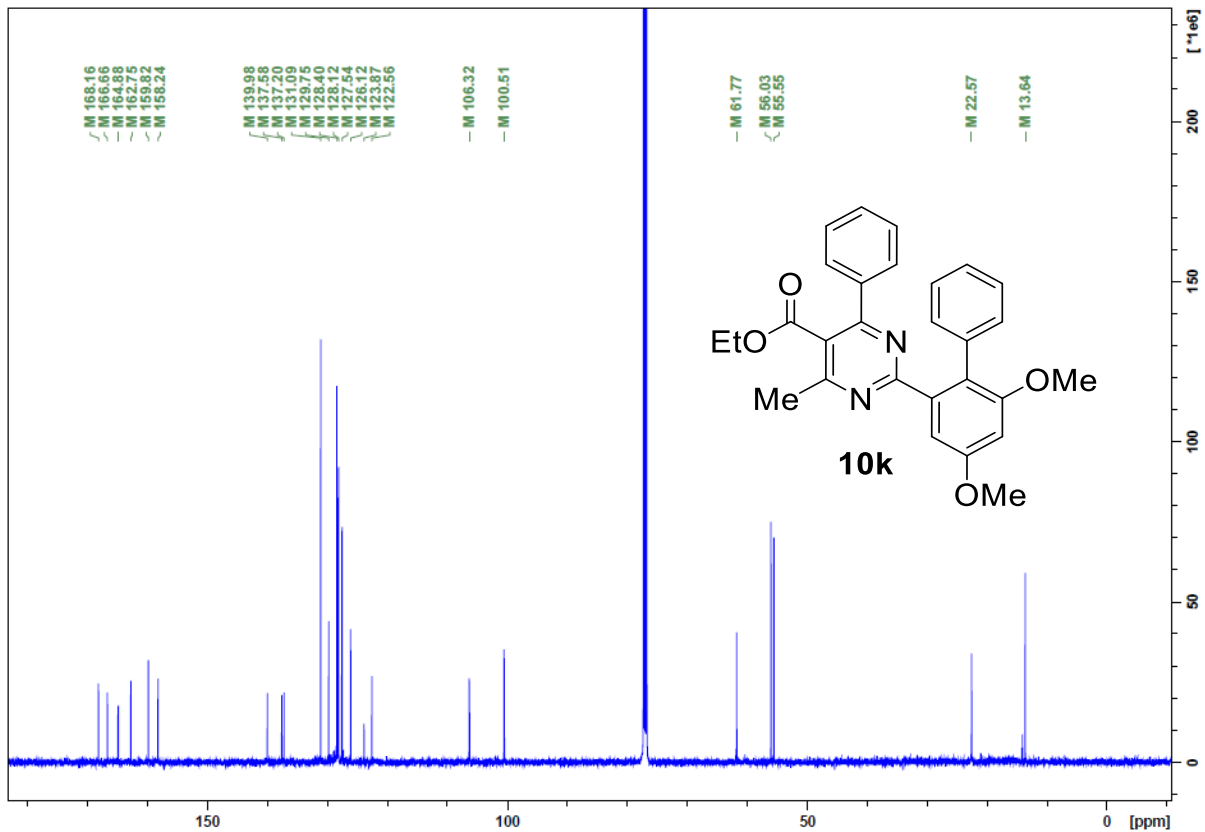



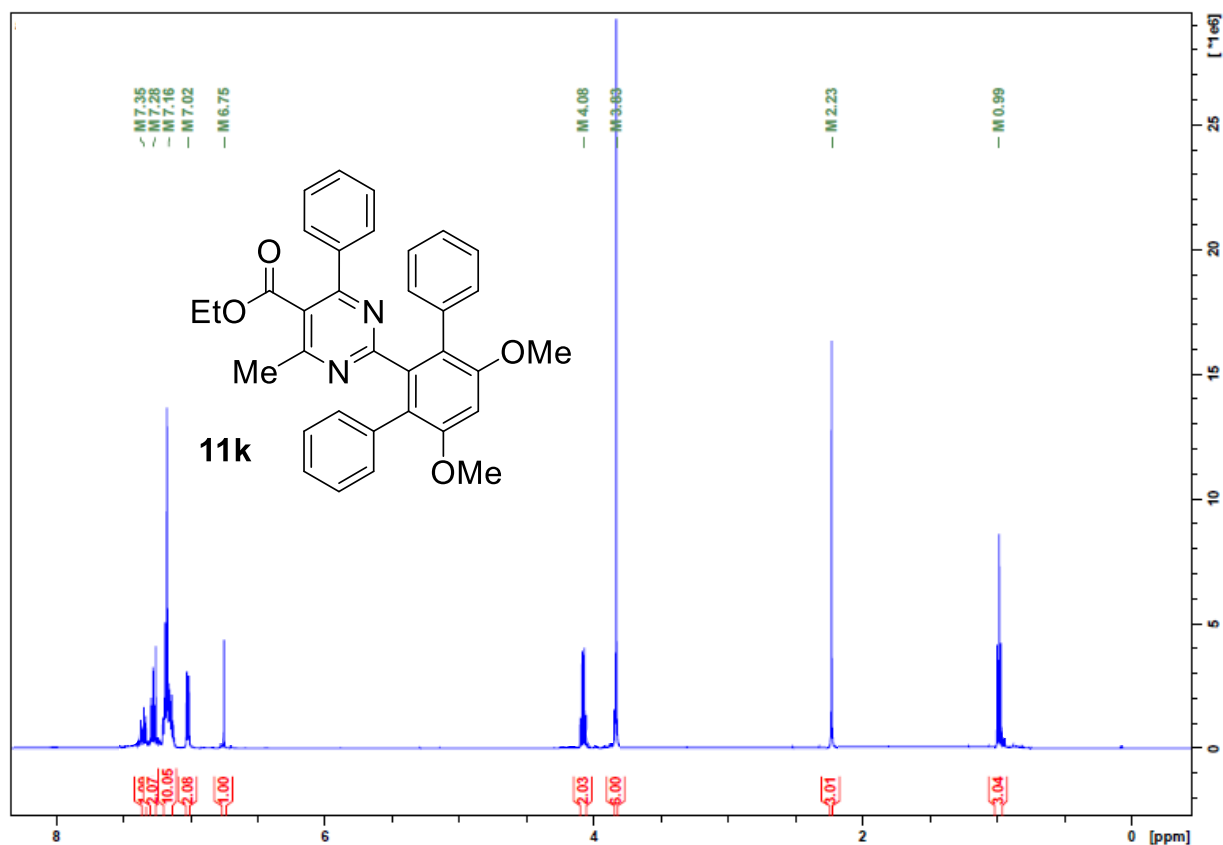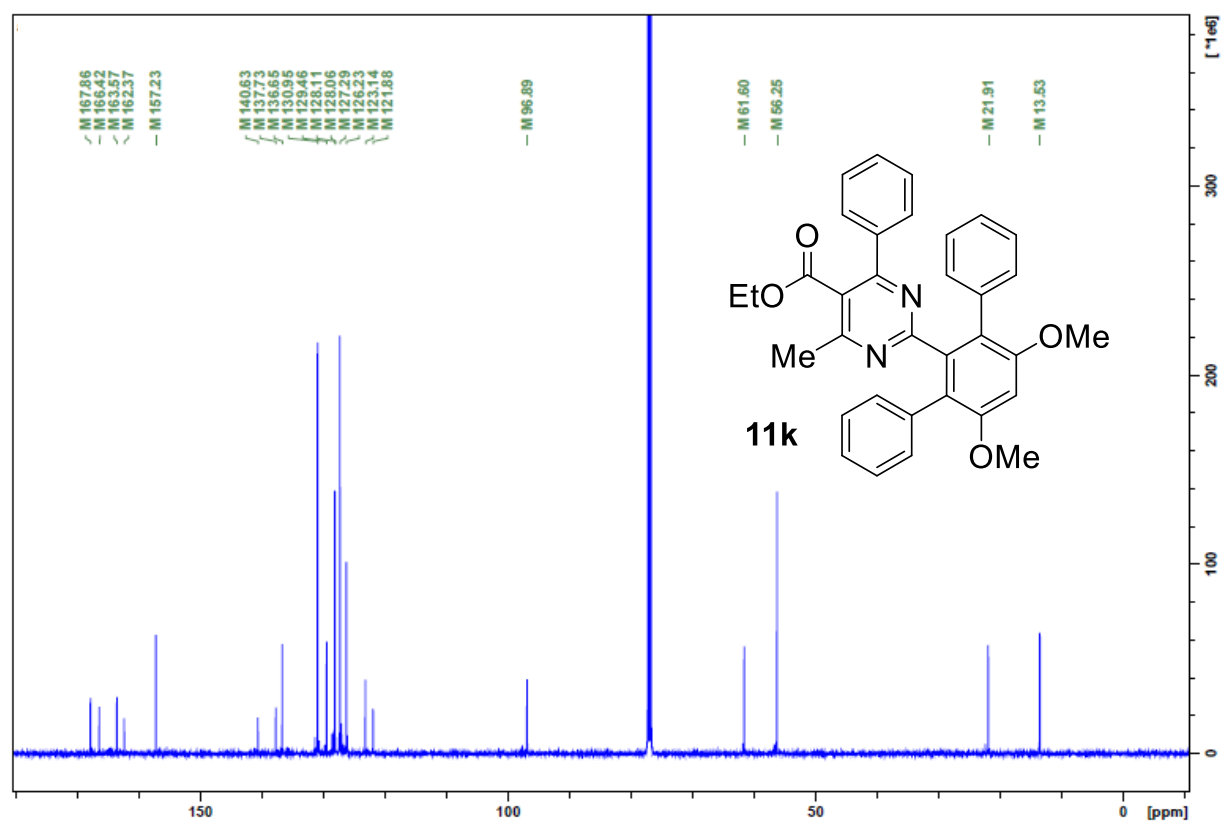

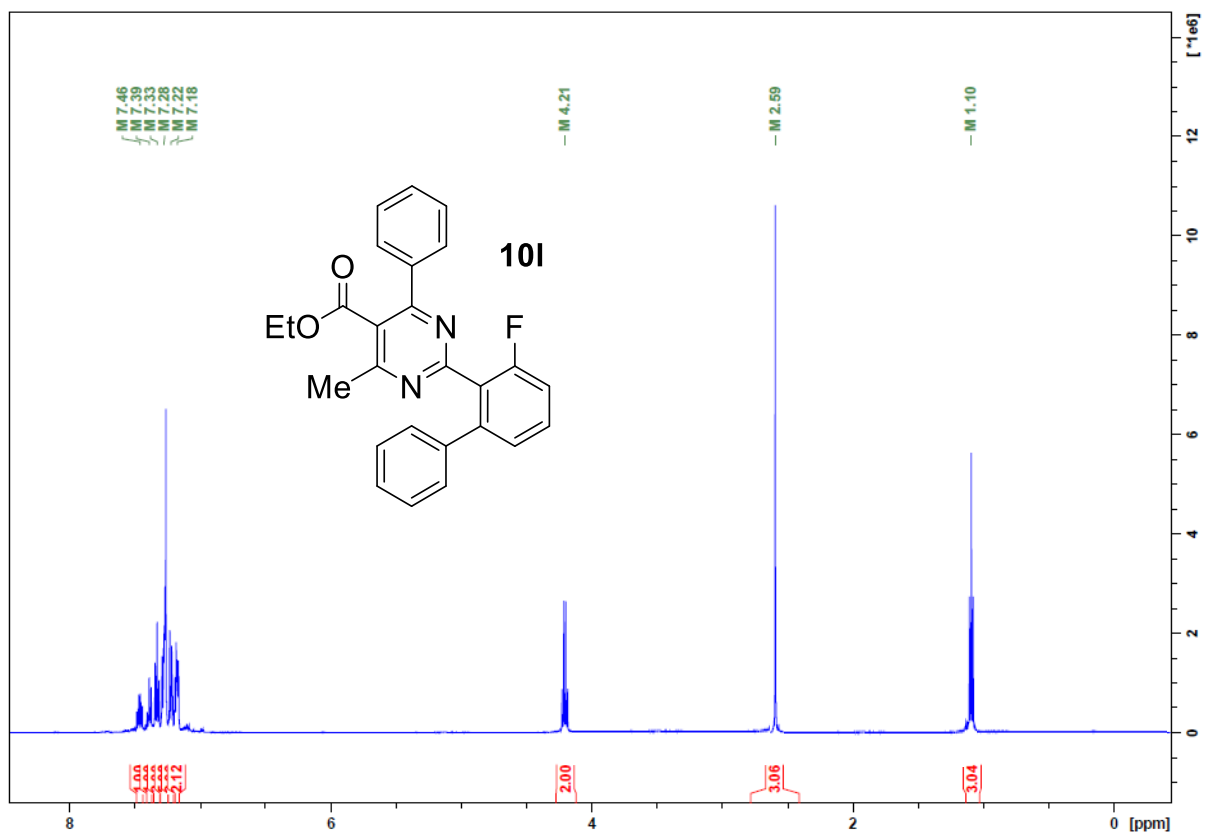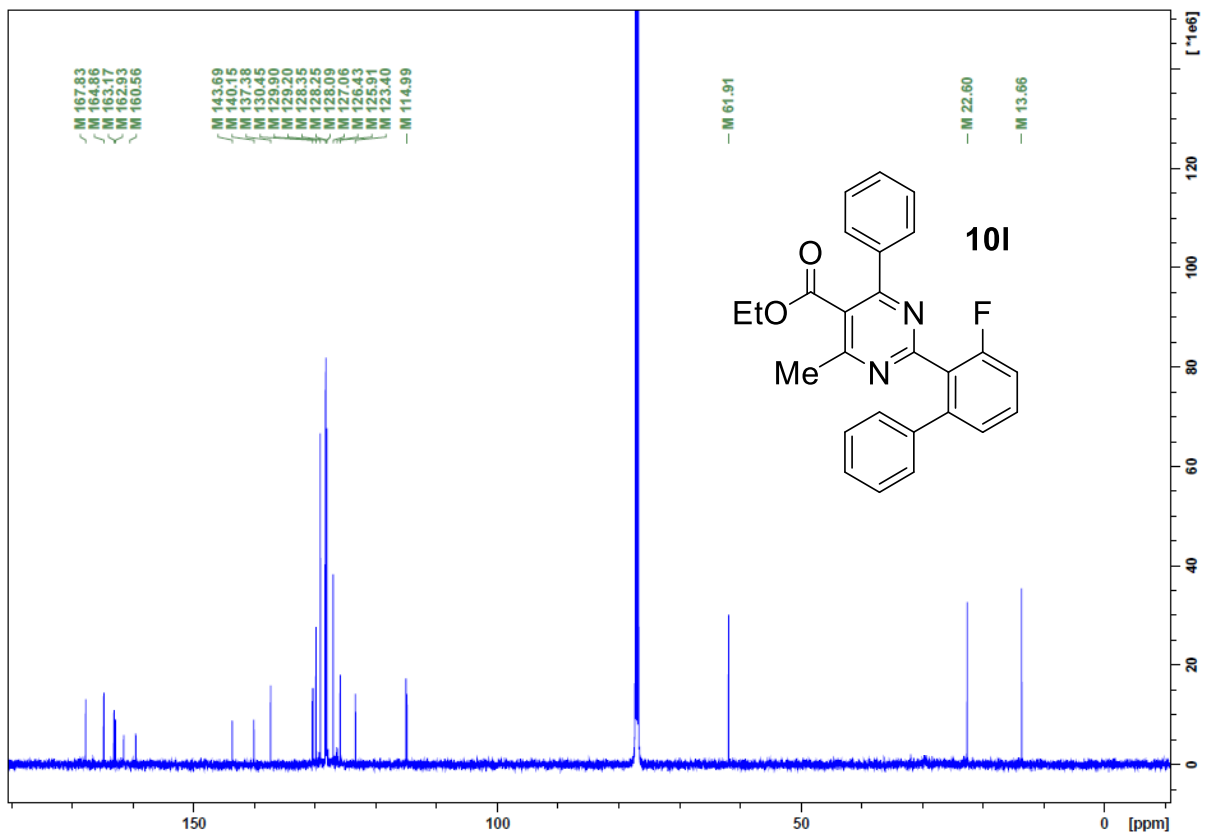

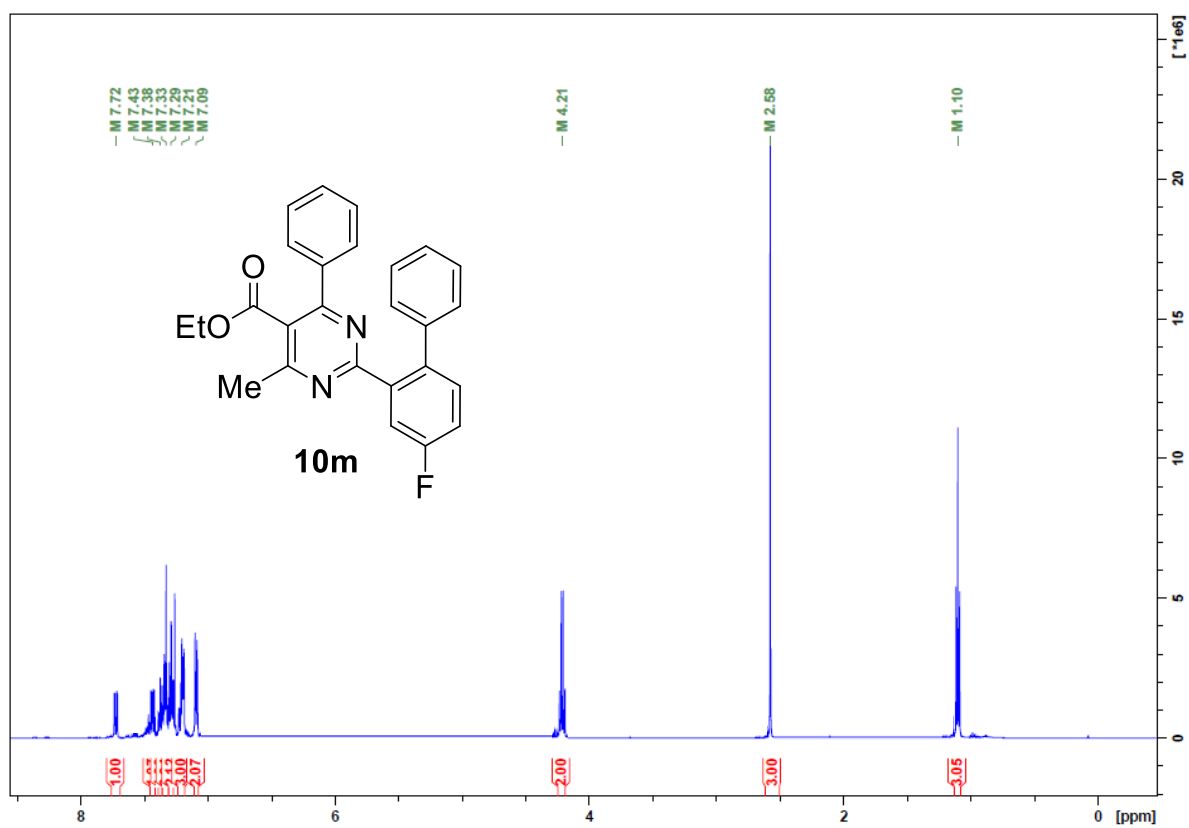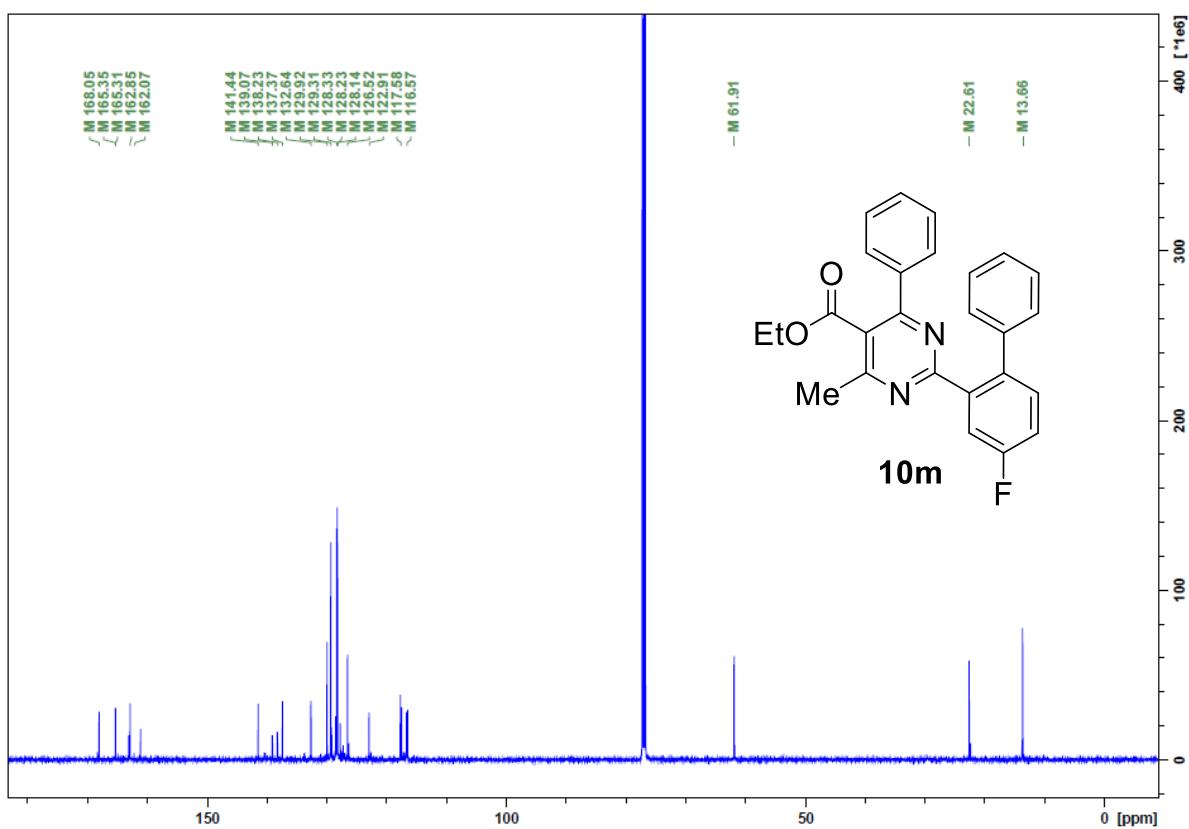

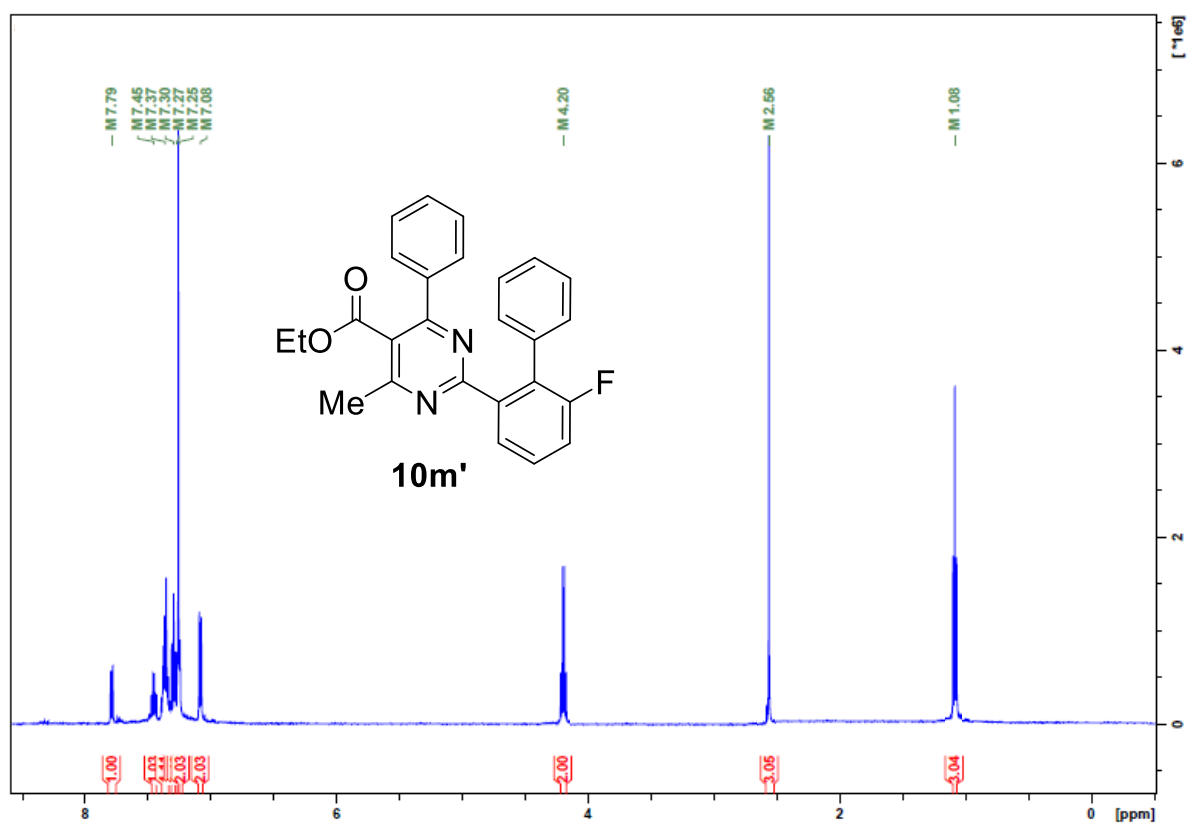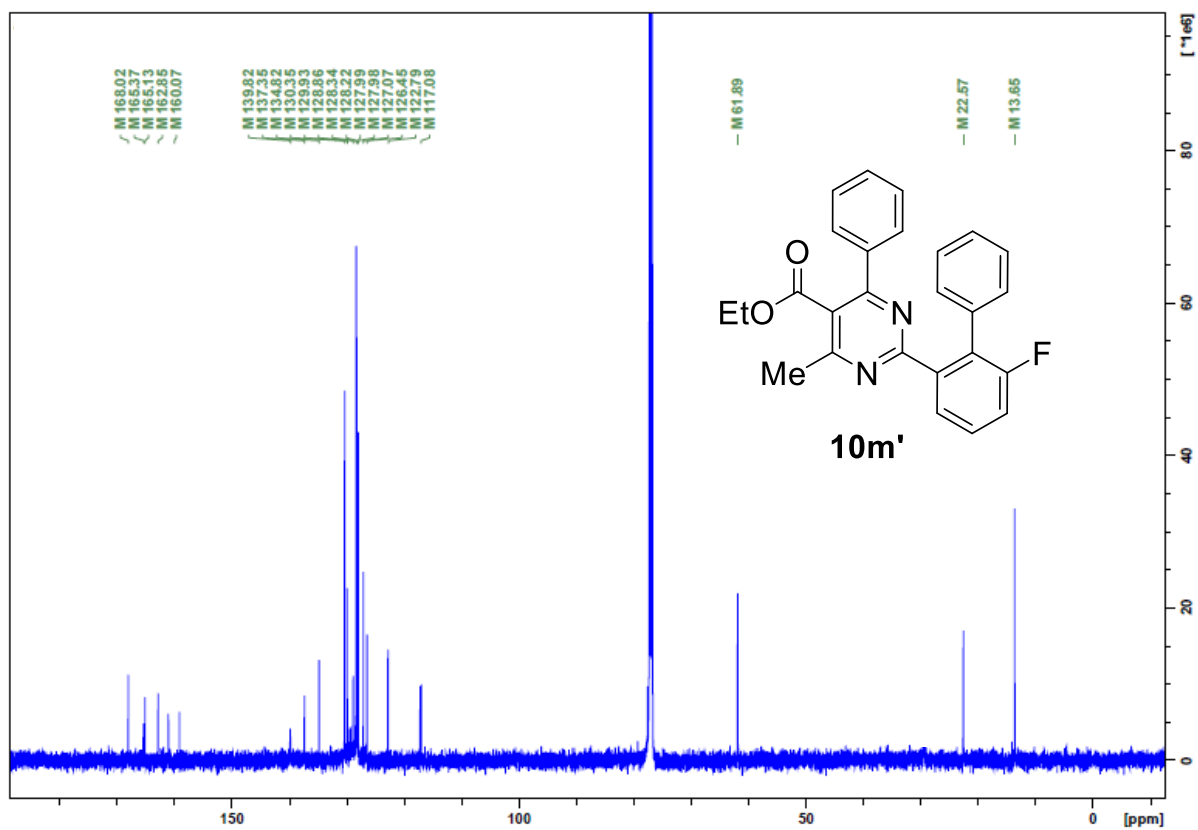

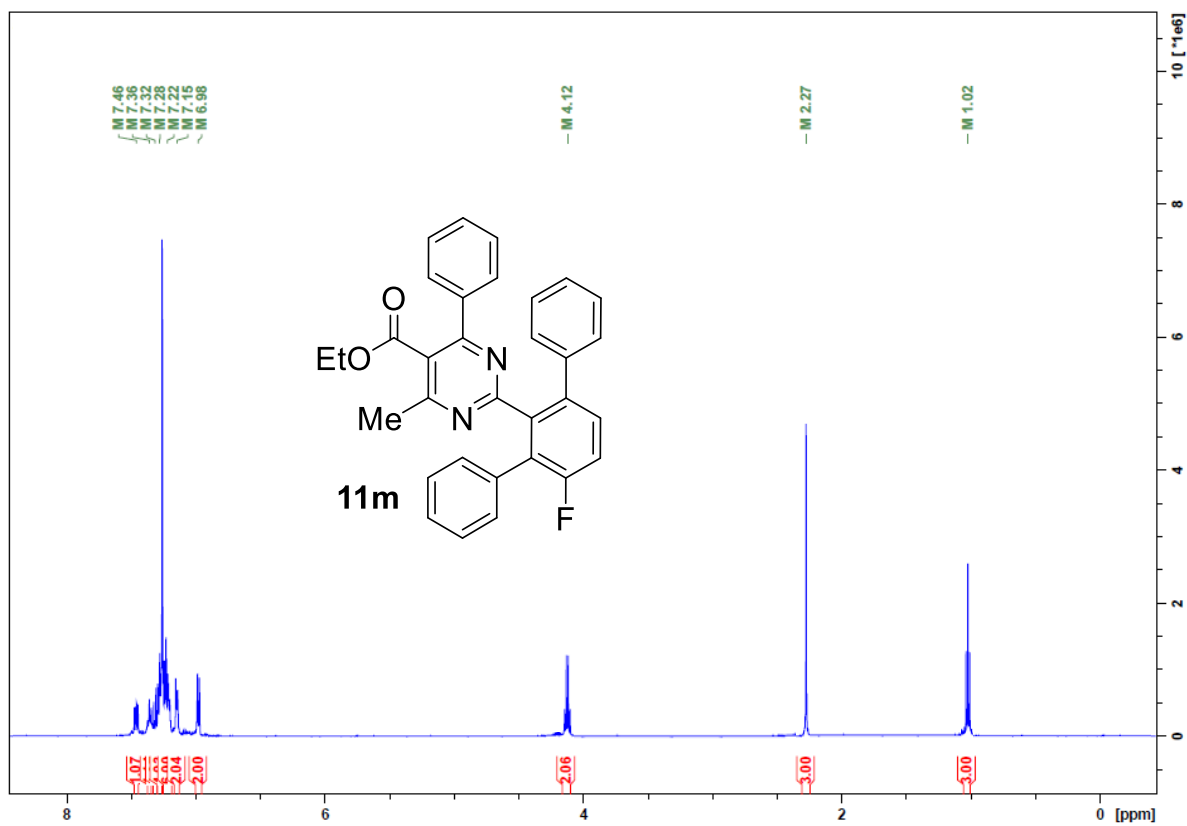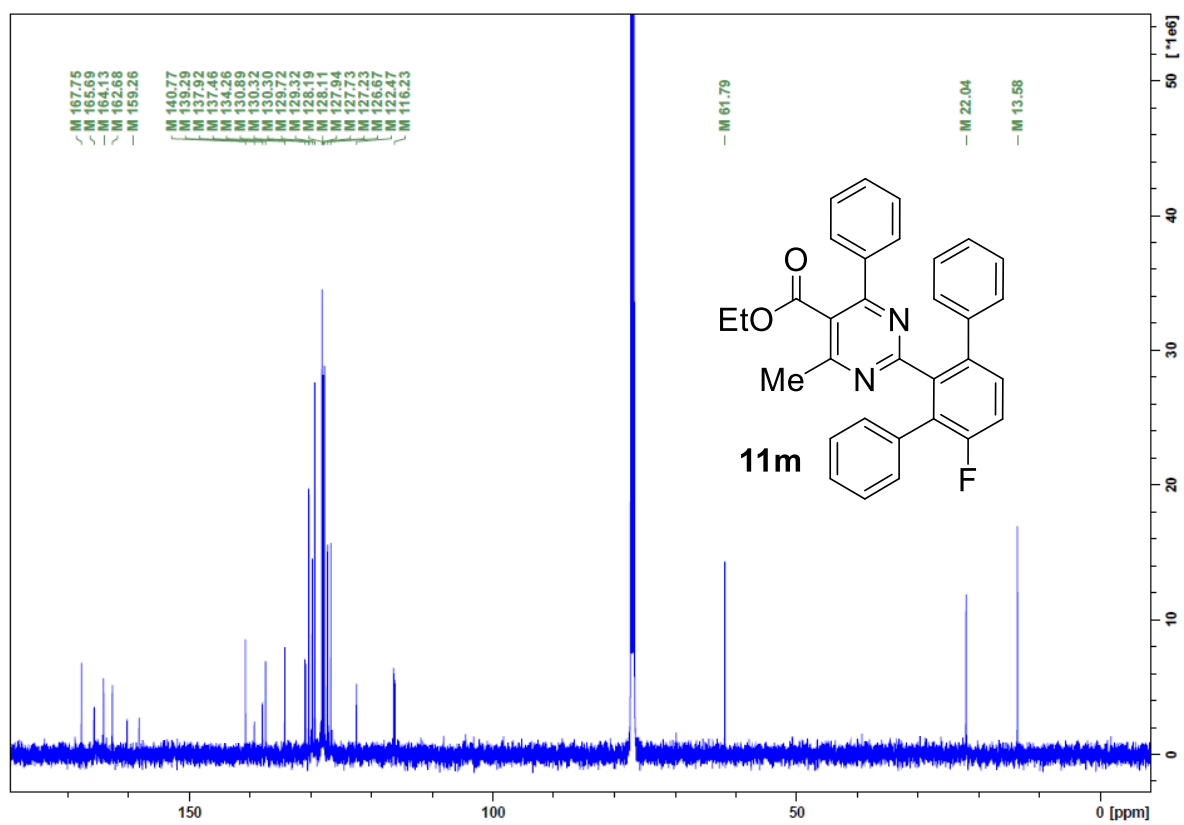

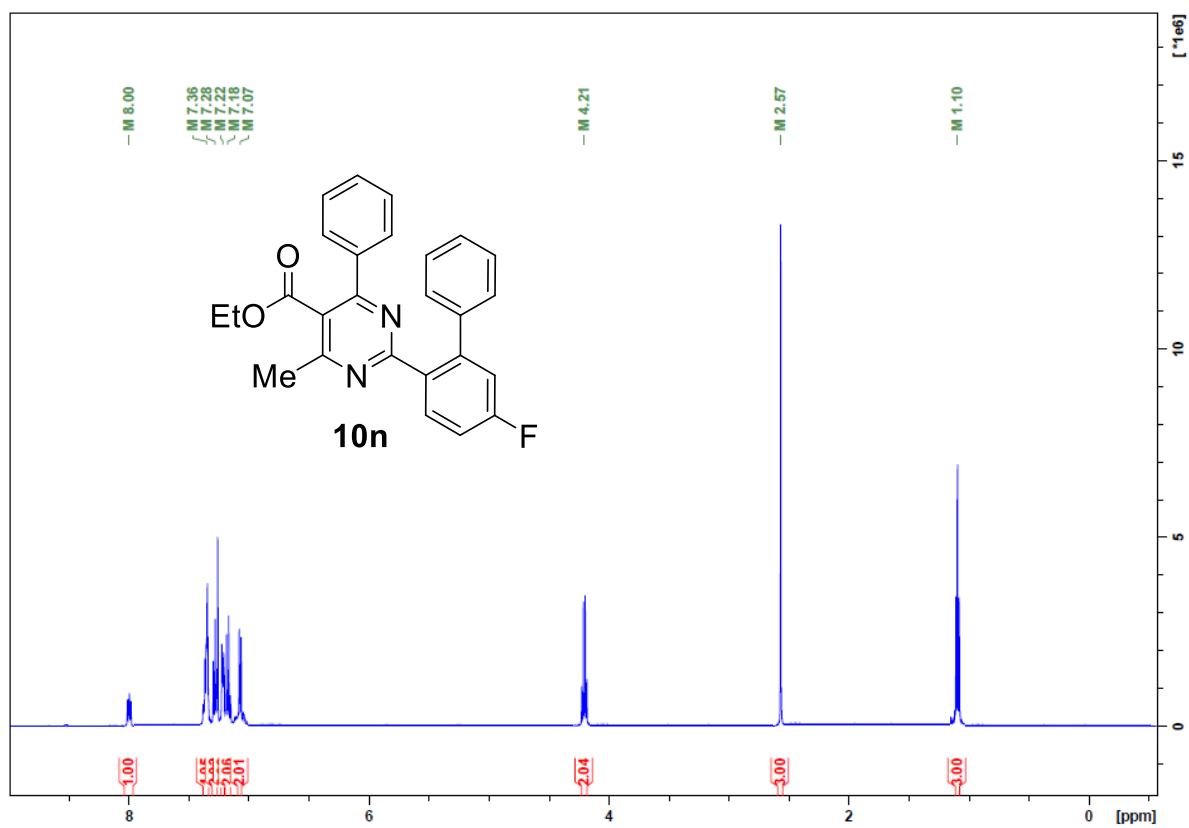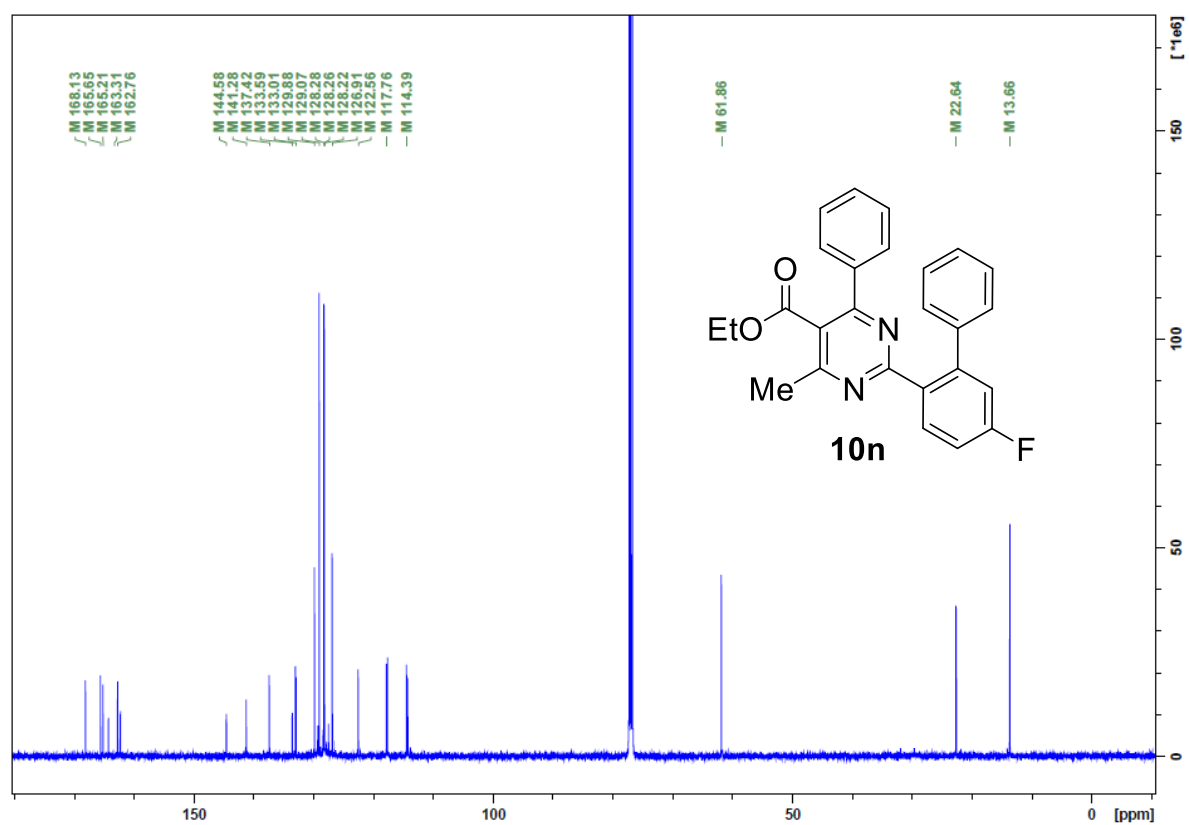

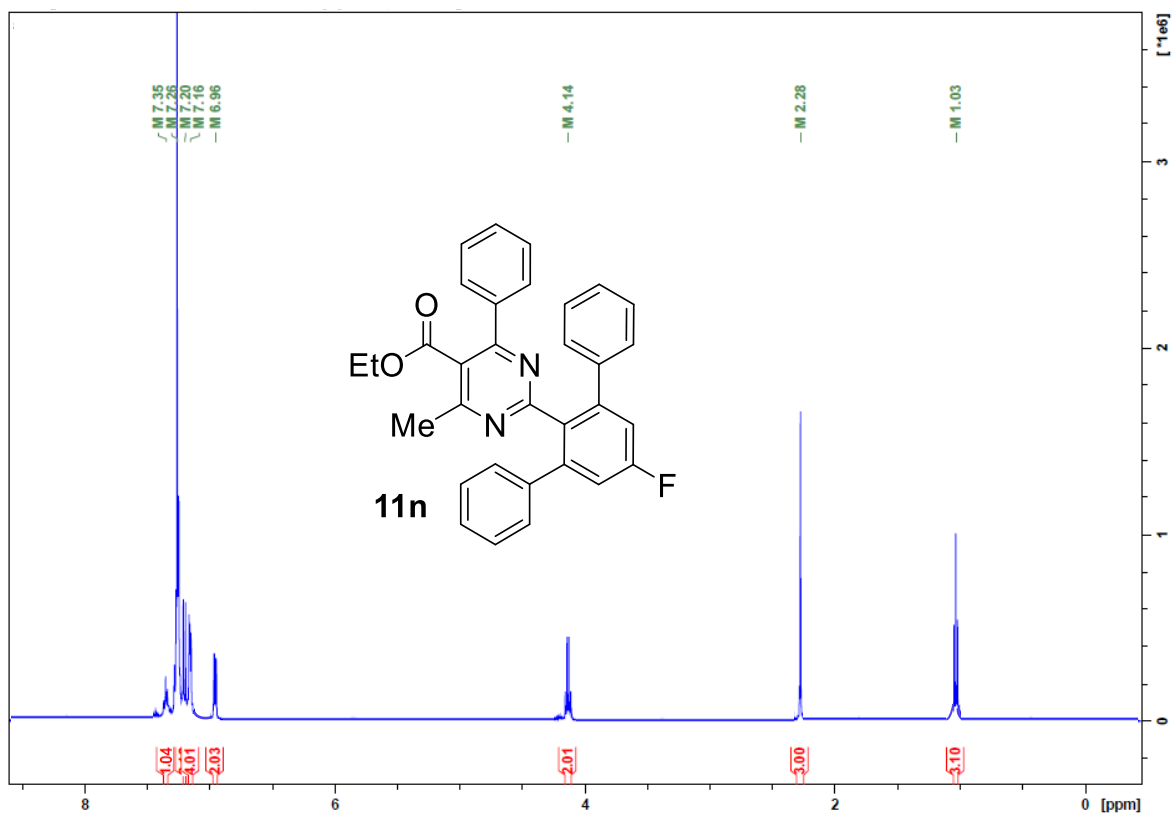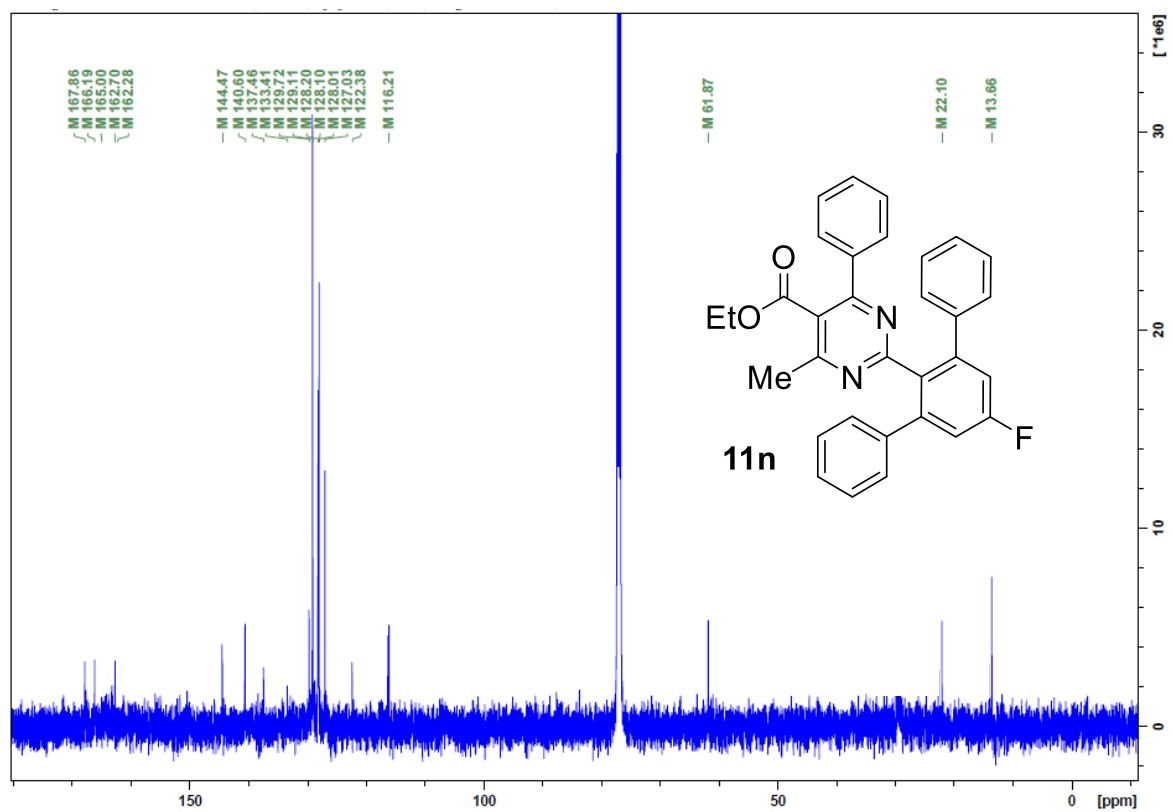

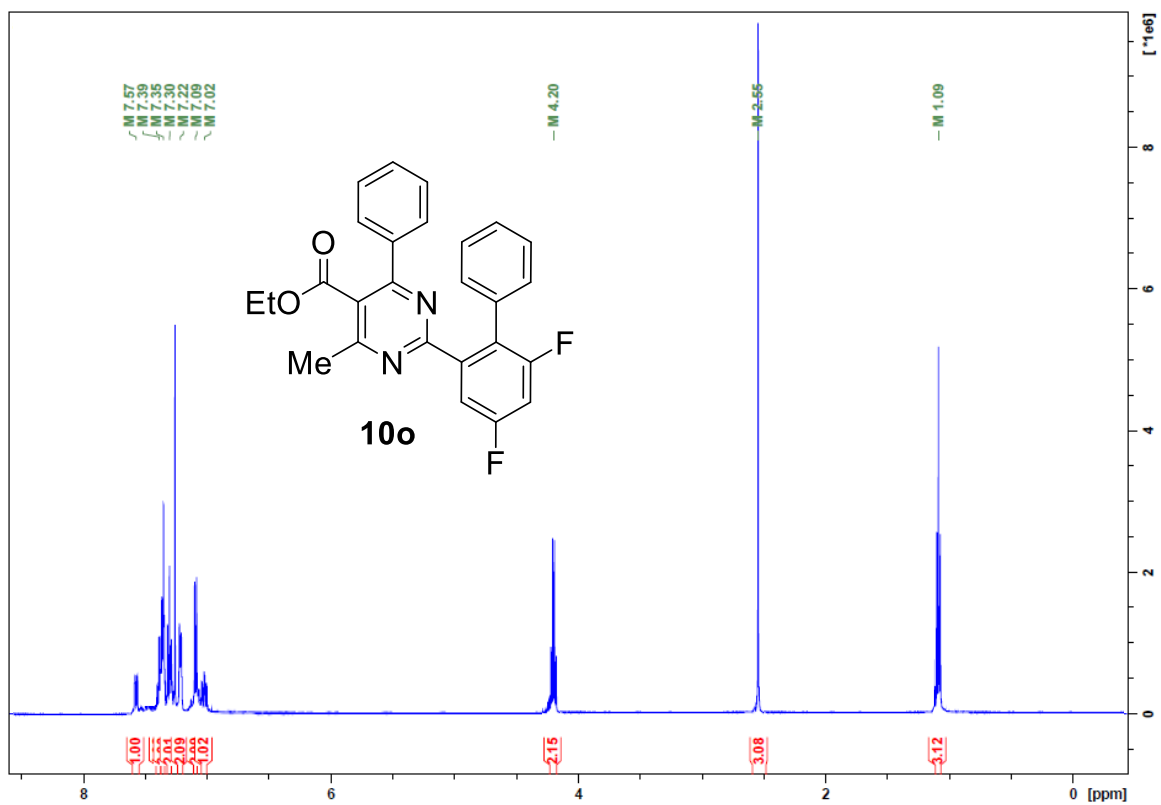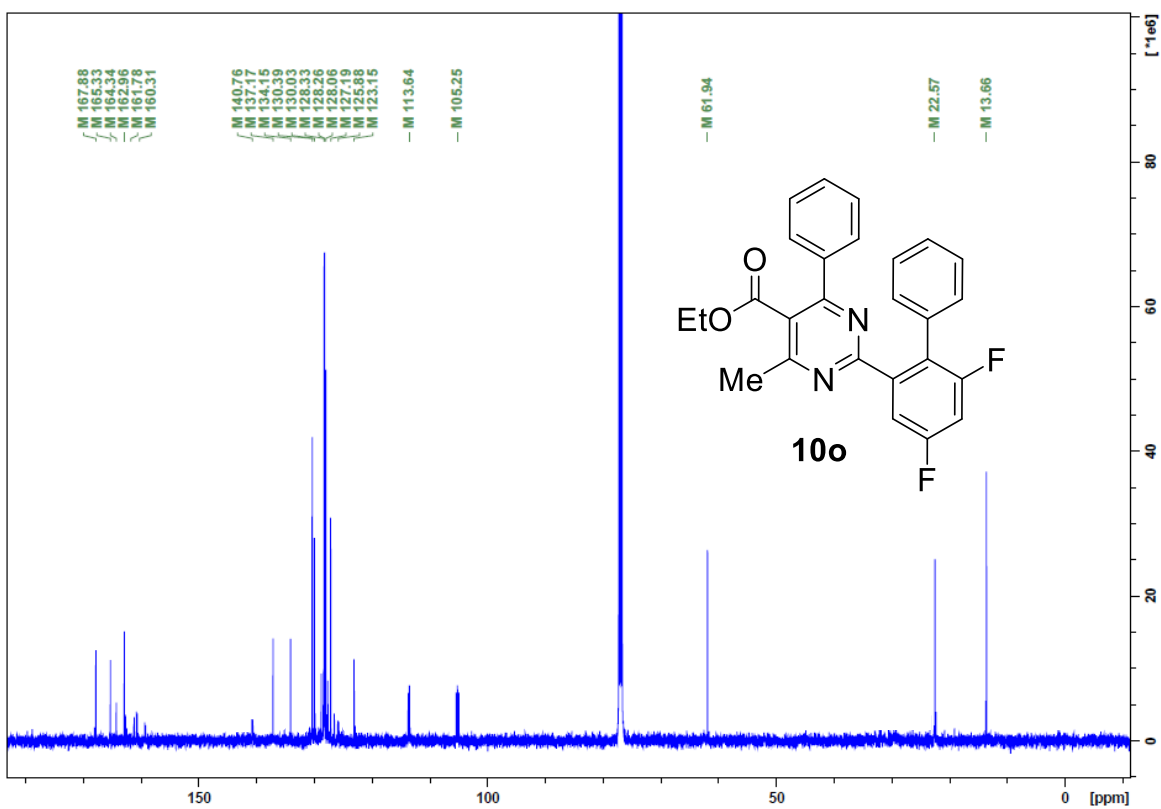



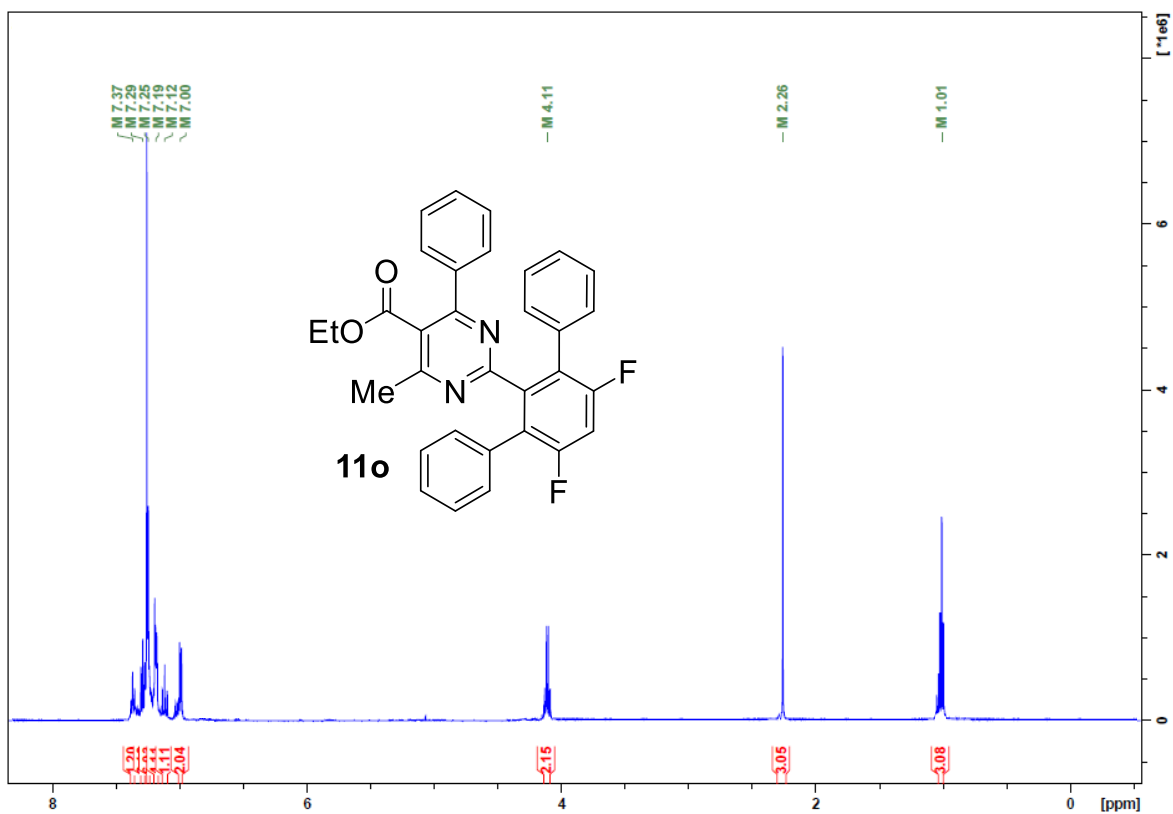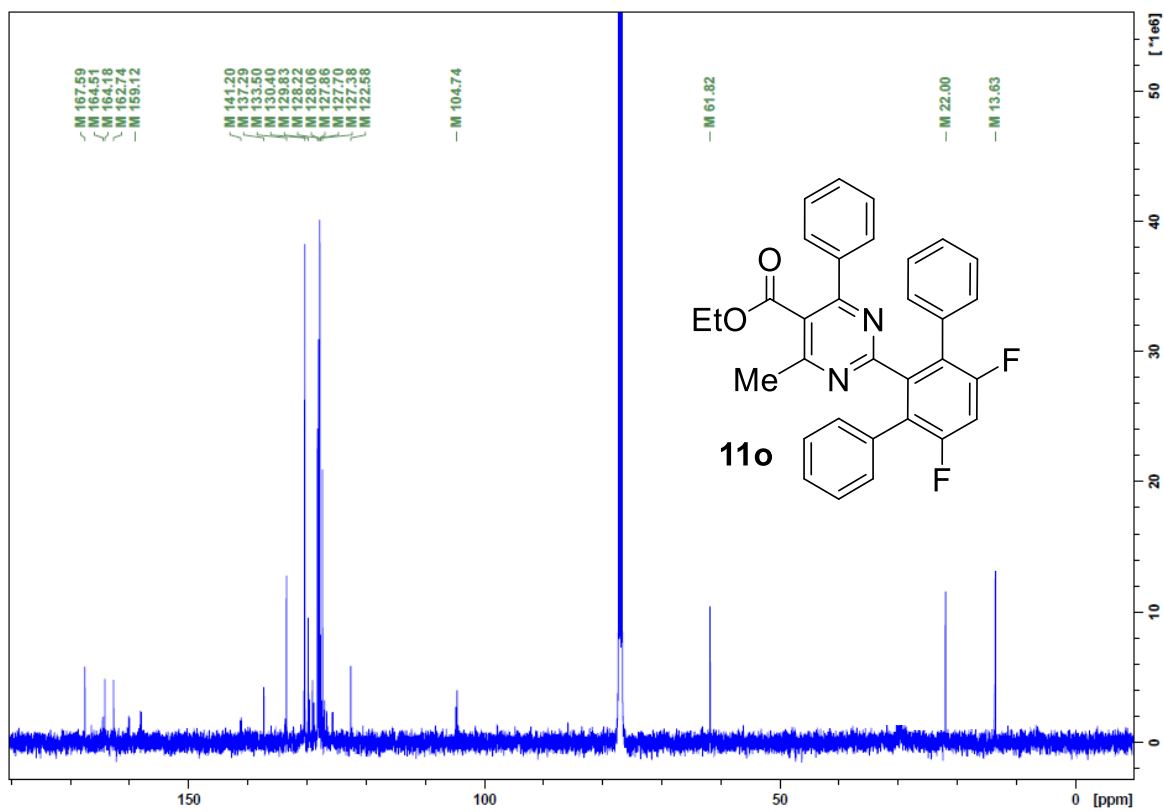

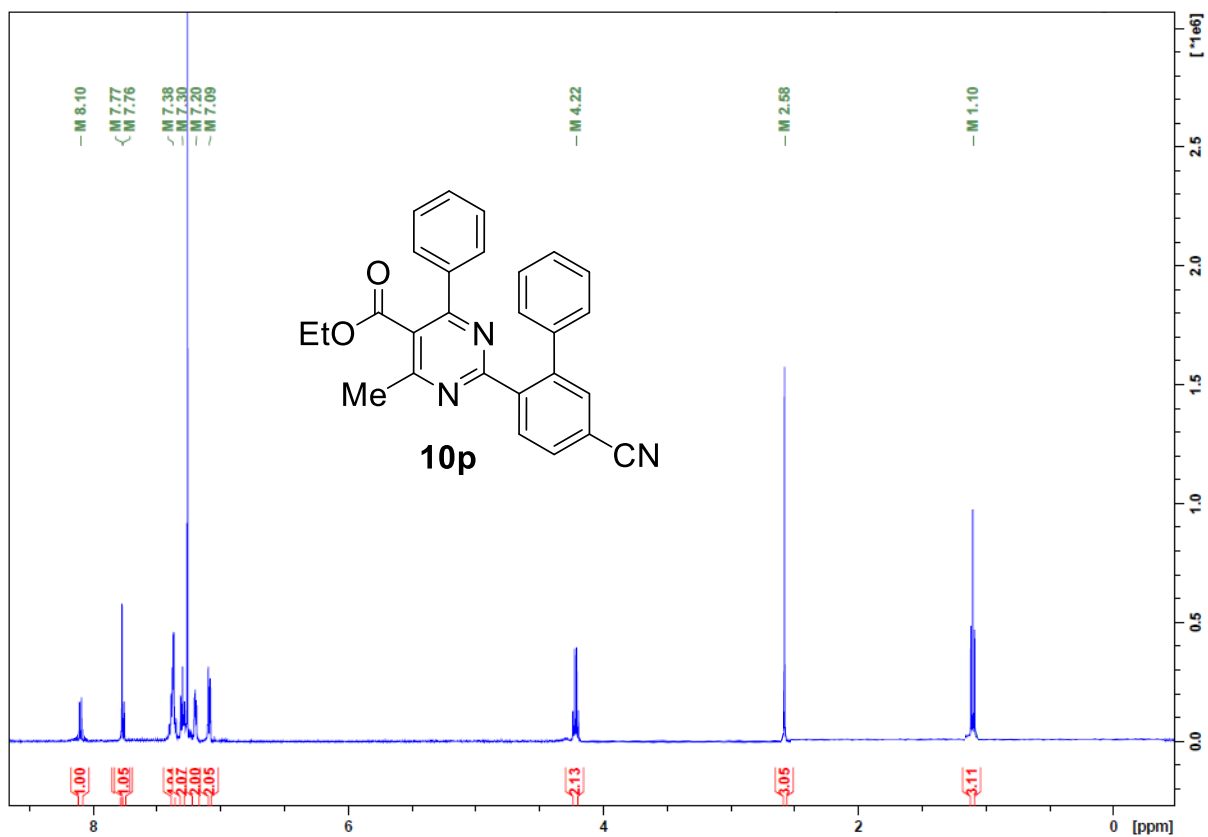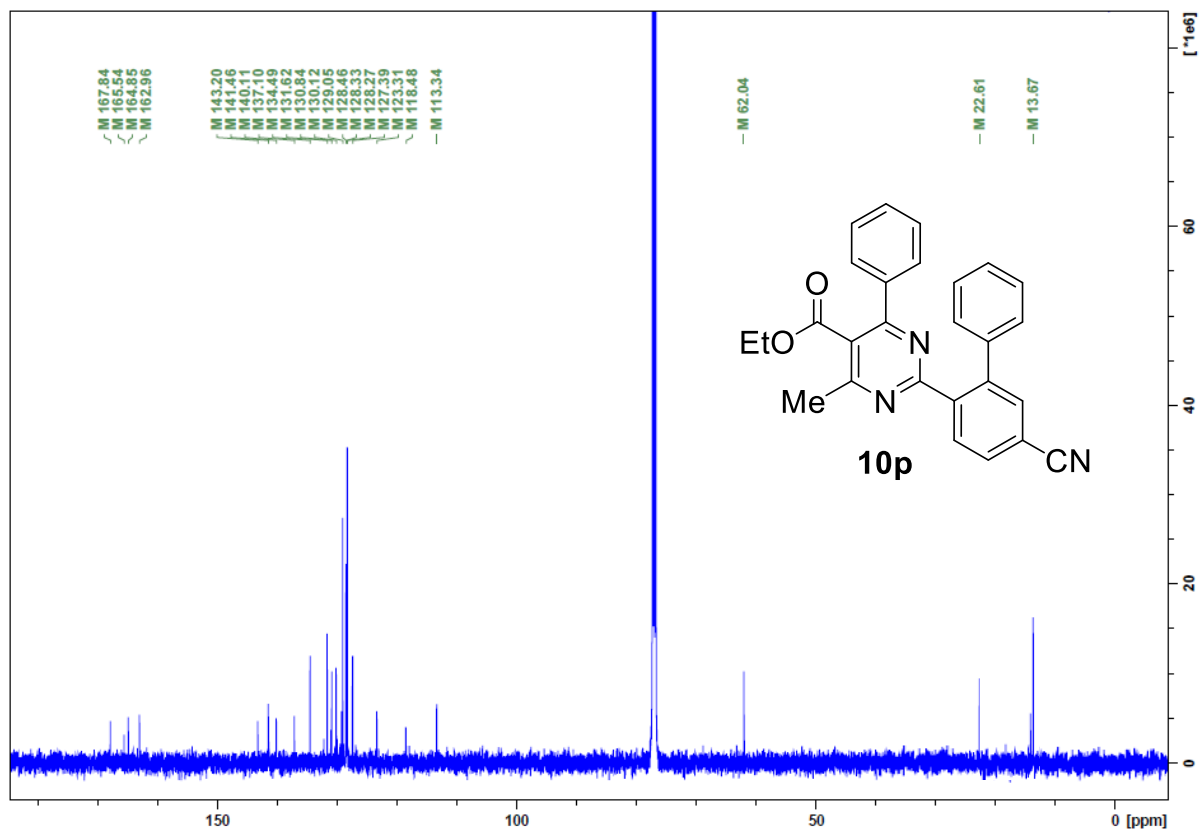

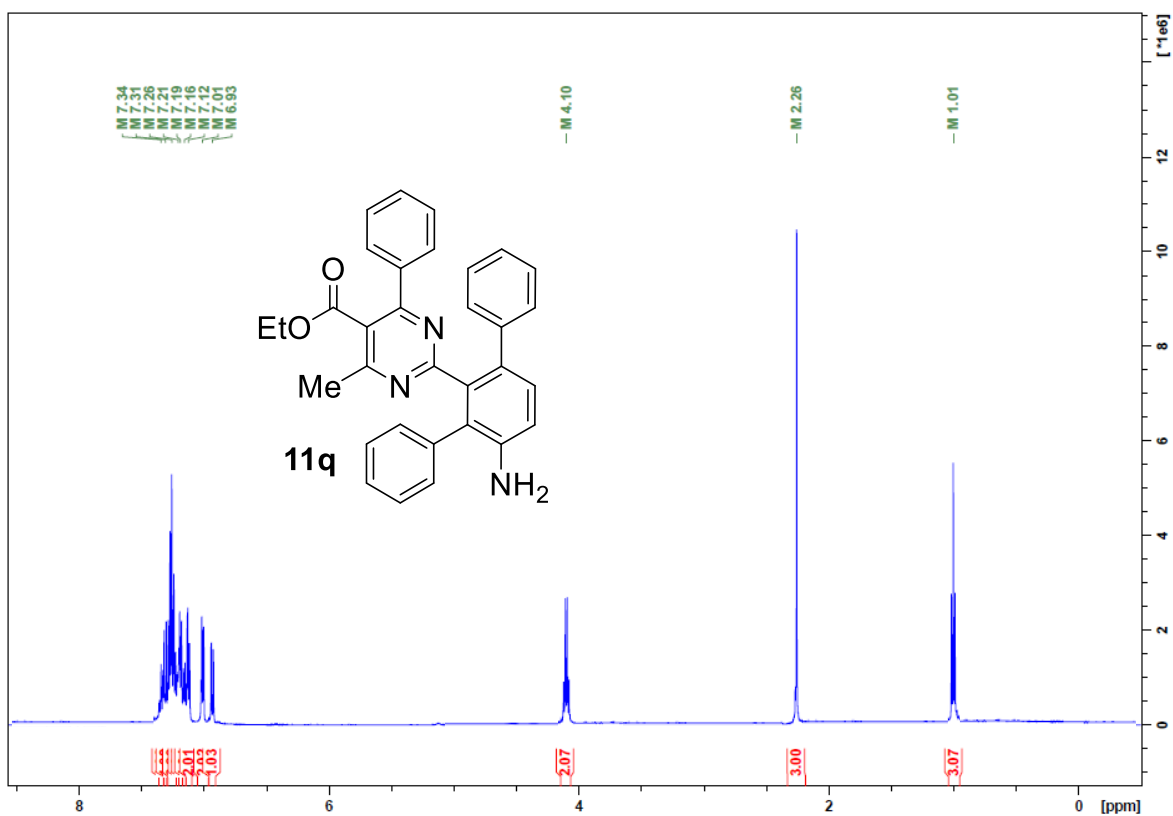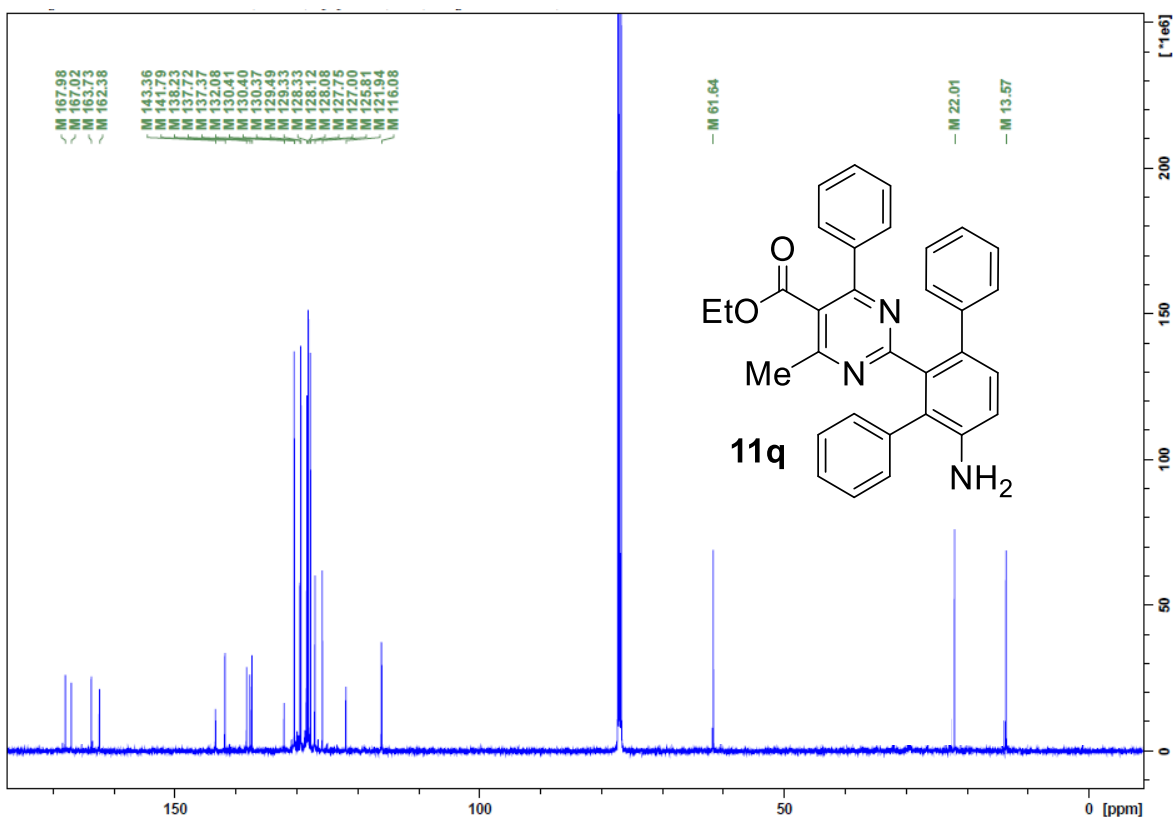

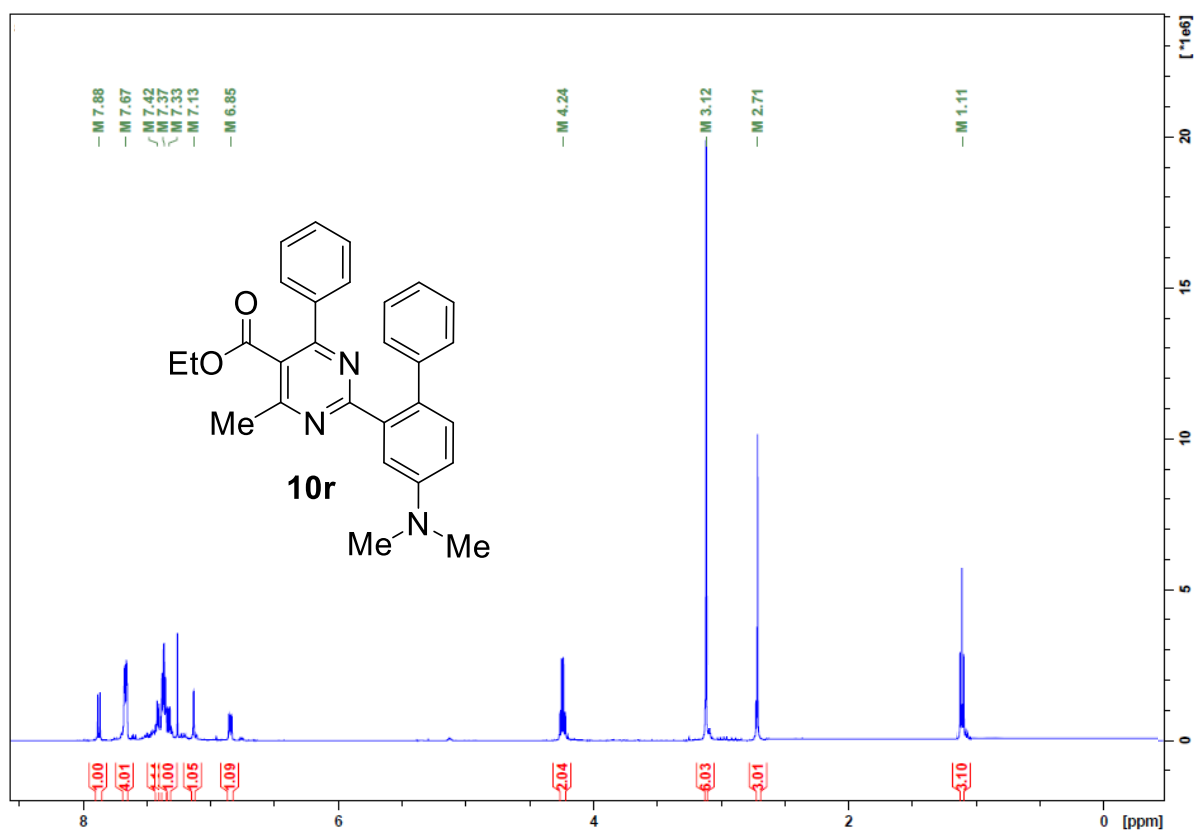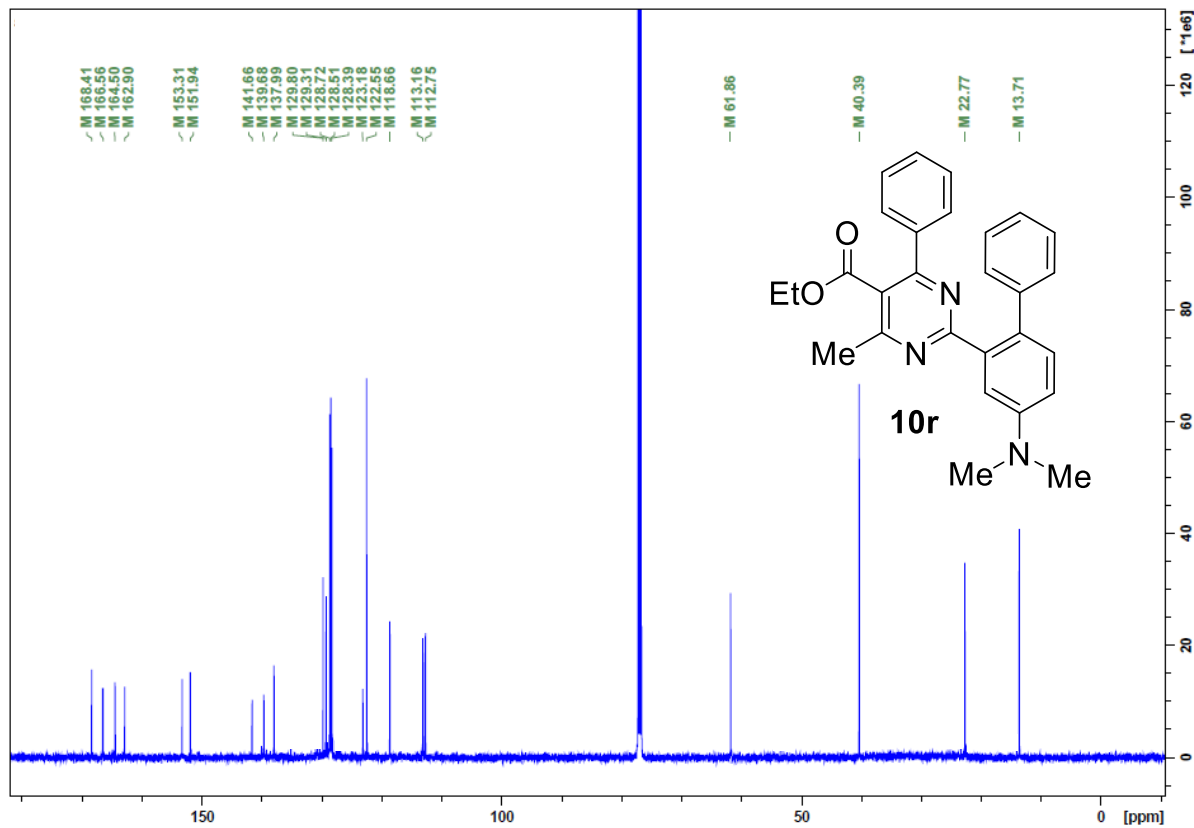

# <sup>1</sup>H – <sup>1</sup>H COSY and NOESY NMR Spectra of Compound 10r

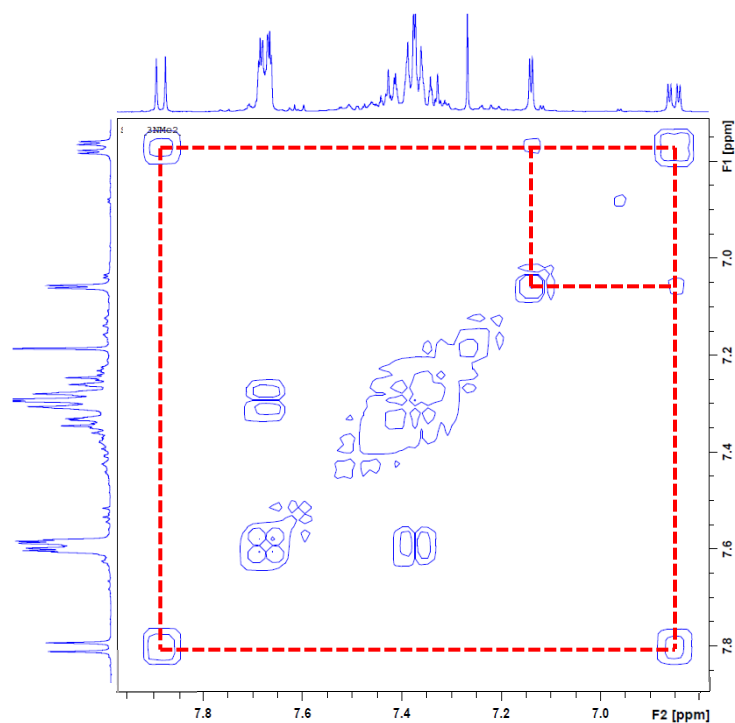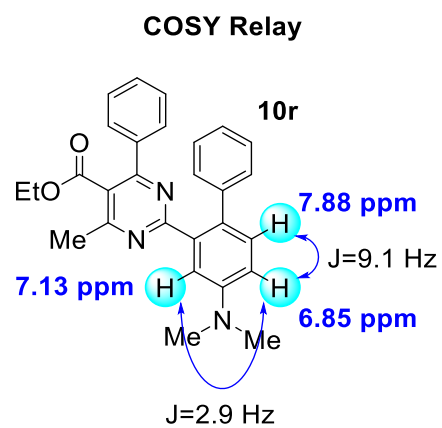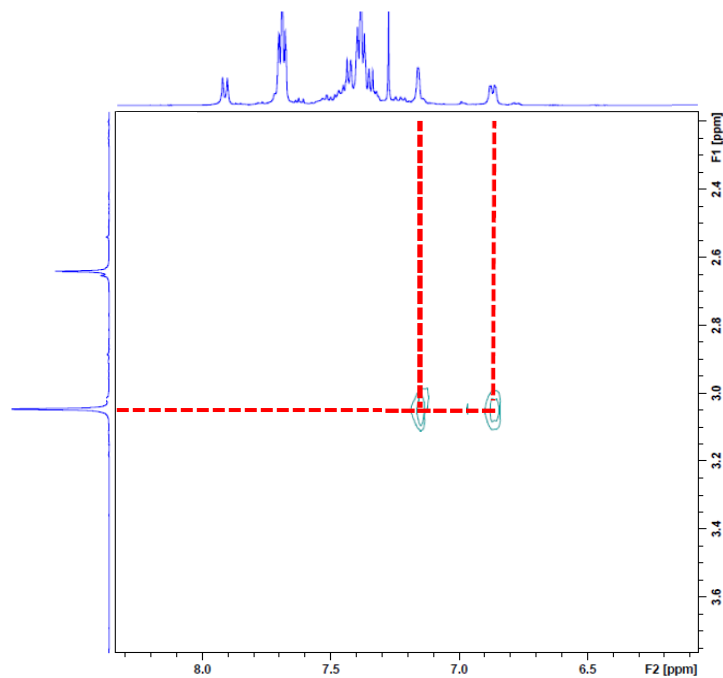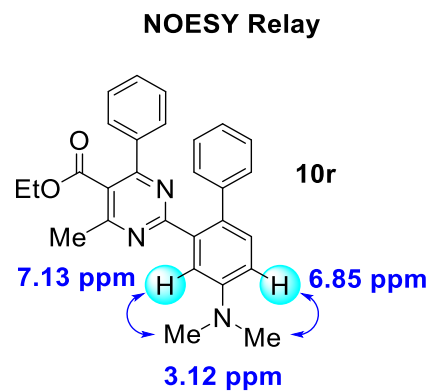

## Single Crystal X-ray Crystallography Procedures

Single crystal X-ray diffraction data were collected on an Oxford-Diffraction Supernova diffractometer, equipped with a CCD area detector utilizing Cu-K $\alpha$  ( $\lambda=1.54184$  Å) radiation. Suitable crystals were attached to glass fibers using paratone-N oil and transferred to a goniostat where they were cooled for data collection. Empirical absorption corrections (multi-scan based on symmetry-related measurements) were applied using CrysAlis RED software.<sup>[1]</sup> The structures were solved by direct methods with SHELXT<sup>[2]</sup> and refined on F<sup>2</sup> using full-matrix least squares with SHELXL-2014/7.<sup>[2]</sup> Software packages used: CrysAlis CCD for data collection;<sup>[1]</sup> CrysAlis RED for cell refinement and data reduction;<sup>[1]</sup> WINGX for geometric calculations;<sup>[3]</sup> DIAMOND<sup>[4]</sup> and MERCURY<sup>[5]</sup> for molecular graphics. The non-H atoms were treated anisotropically, whereas the H atoms were placed in calculated, ideal positions and refined as riding on their respective carbon atoms. Unit cell parameters and structure solution and refinement data for compound **10a** are listed in Table S1.

---

<sup>[1]</sup> Oxford Diffraction, CrysAlis CCD and CrysAlis RED, Oxford Diffraction Ltd, Abingdon, Oxford, England, 2008.

<sup>[2]</sup> G. M. Sheldrick, SHELXL-2014/7, Program for Refinement of Crystal Structures, University of Göttingen, Germany, 2014.

<sup>[3]</sup> L. J. Farrugia, WinGX suite for small-molecule single-crystal crystallography, *J. Appl. Crystallogr.* **1999**, *32*, 837-838.

<sup>[4]</sup> Diamond - Crystal and Molecular Structure Visualization Crystal Impact - K. Brandenburg & H. Putz, GbR, Rathausgasse 30, D-53111, Bonn, Germany.

<sup>[5]</sup> Mercury CSD 2.0 - new features for the visualization and investigation of crystal structures, C. F. Macrae, I. J. Bruno, J. A. Chisholm, P. R. Edgington, P. McCabe, E. Pidcock, L. Rodriguez-Monge, R. Taylor, J. van de Streek, P. A. Wood, *J. Appl. Crystallogr.* **2008**, *41*, 466-470.

## Crystallographic Data of Compound 10a

**Table S1.** Crystal data and structure refinement for compound **10a** at 108.15(10) K.

|                                |                                                               |
|--------------------------------|---------------------------------------------------------------|
| Empirical formula              | C <sub>26</sub> H <sub>22</sub> N <sub>2</sub> O <sub>2</sub> |
| Formula weight                 | 394.45                                                        |
| Temperature                    | 108.15(10) K                                                  |
| Wavelength                     | 1.54184 Å                                                     |
| Crystal system                 | Monoclinic                                                    |
| Space group                    | P 2 <sub>1</sub> /c                                           |
| Unit cell dimensions           | a = 10.1280(3) Å, α = 90°                                     |
|                                | b = 18.8434(4) Å, β = 111.420(3)°                             |
|                                | c = 11.5758(3) Å, γ = 90°                                     |
| Volume                         | 2056.6(1) Å <sup>3</sup>                                      |
| Z                              | 4                                                             |
| Density (calculated)           | 1.274 g/cm <sup>3</sup>                                       |
| Absorption coefficient         | 0.643 mm <sup>-1</sup>                                        |
| F(000)                         | 832                                                           |
| Crystal size                   | 0.1 x 0.09 x 0.01 mm <sup>3</sup>                             |
| θ range for data collection    | 4.690 to 66.992°                                              |
| Index ranges                   | -11 ≤ h ≤ 12, -22 ≤ k ≤ 22, -13 ≤ l ≤ 13                      |
| Reflections collected          | 12573                                                         |
| Independent reflections        | 3667 [R <sub>int</sub> = 0.0259]                              |
| Completeness to θ = 66.992°    | 100%                                                          |
| Refinement method              | Full-matrix least-squares on F <sup>2</sup>                   |
| Data / restraints / parameters | 3667 / 0 / 271                                                |
| Goodness-of-fit                | 1.013                                                         |
| Final R indices [I > 2σ(I)]    | R <sub>obs</sub> = 0.0416, wR <sub>obs</sub> = 0.1123         |

R indices [all data]

$R_{\text{all}} = 0.0472$ ,  $wR_{\text{all}} = 0.1165$

Largest diff. peak and hole

0.406 and -0.420 e<sup>-</sup>Å<sup>-3</sup>

---

$R = \sum ||F_o| - |F_c|| / \sum |F_o|$ ,  $wR = \{ \sum [w(|F_o|^2 - |F_c|^2)^2] / \sum [w(|F_o|^4)] \}^{1/2}$  and  $w = 1 / [\sigma^2(F_o^2) + (0.0676P)^2 + 0.8373P]$ ,  
 where  $P = (F_o^2 + 2F_c^2) / 3$

---

**Table S2.** Bond lengths [Å] for compound **10a** at 108.15(10) K with estimated standard deviations in parentheses.

| Label*      | Distances  |
|-------------|------------|
| C(2)-N(3)   | 1.3325(19) |
| C(2)-N(1)   | 1.3462(19) |
| C(2)-C(17)  | 1.490(2)   |
| C(4)-N(3)   | 1.3428(19) |
| C(4)-C(5)   | 1.402(2)   |
| C(4)-C(7)   | 1.486(2)   |
| C(5)-C(6)   | 1.399(2)   |
| C(5)-C(13)  | 1.496(2)   |
| C(6)-N(1)   | 1.3375(19) |
| C(6)-C(16)  | 1.502(2)   |
| C(7)-C(12)  | 1.391(2)   |
| C(7)-C(8)   | 1.398(2)   |
| C(8)-C(9)   | 1.386(2)   |
| C(8)-H(8)   | 0.9300     |
| C(9)-C(10)  | 1.388(3)   |
| C(9)-H(9)   | 0.9300     |
| C(10)-C(11) | 1.387(3)   |
| C(10)-H(10) | 0.9300     |
| C(11)-C(12) | 1.389(2)   |



|              |            |
|--------------|------------|
| C(11)-H(11)  | 0.9300     |
| C(12)-H(12)  | 0.9300     |
| C(13)-O(1)   | 1.2034(18) |
| C(13)-O(2)   | 1.3313(18) |
| C(14)-O(2)   | 1.4679(18) |
| C(14)-C(15)  | 1.496(2)   |
| C(14)-H(14A) | 0.9700     |
| C(14)-H(14B) | 0.9700     |
| C(15)-H(15A) | 0.9600     |
| C(15)-H(15B) | 0.9600     |
| C(15)-H(15C) | 0.9600     |
| C(16)-H(16A) | 0.9600     |
| C(16)-H(16B) | 0.9600     |
| C(16)-H(16C) | 0.9600     |
| C(17)-C(18)  | 1.399(2)   |
| C(17)-C(22)  | 1.406(2)   |
| C(18)-C(19)  | 1.385(2)   |
| C(18)-H(18)  | 0.9300     |
| C(19)-C(20)  | 1.390(2)   |
| C(19)-H(19)  | 0.9300     |
| C(20)-C(21)  | 1.384(2)   |
| C(20)-H(20)  | 0.9300     |
| C(21)-C(22)  | 1.402(2)   |
| C(21)-H(21)  | 0.9300     |
| C(22)-C(23)  | 1.491(2)   |
| C(23)-C(28)  | 1.394(2)   |
| C(23)-C(24)  | 1.397(2)   |

|             |          |
|-------------|----------|
| C(24)-C(25) | 1.388(2) |
| C(24)-H(24) | 0.9300   |
| C(25)-C(26) | 1.386(2) |
| C(25)-H(25) | 0.9300   |
| C(26)-C(27) | 1.386(2) |
| C(26)-H(26) | 0.9300   |
| C(27)-C(28) | 1.387(2) |
| C(27)-H(27) | 0.9300   |
| C(28)-H(28) | 0.9300   |

---

\* Atom numbering corresponds to the deposited crystal structure numbering.

**Table S3.** Bond angles [°] for compound **10a** at 108.15(10) K with estimated standard deviations in parentheses.

| Label*          | Angles     |
|-----------------|------------|
| N(3)-C(2)-N(1)  | 126.28(13) |
| N(3)-C(2)-C(17) | 117.33(13) |
| N(1)-C(2)-C(17) | 116.33(13) |
| N(3)-C(4)-C(5)  | 120.85(13) |
| N(3)-C(4)-C(7)  | 115.68(12) |
| C(5)-C(4)-C(7)  | 123.46(13) |
| C(6)-C(5)-C(4)  | 117.37(13) |
| C(6)-C(5)-C(13) | 119.02(13) |
| C(4)-C(5)-C(13) | 123.61(13) |
| N(1)-C(6)-C(5)  | 121.59(13) |
| N(1)-C(6)-C(16) | 116.43(13) |
| C(5)-C(6)-C(16) | 121.93(13) |
| C(12)-C(7)-C(8) | 119.28(14) |

|                     |            |
|---------------------|------------|
| C(12)-C(7)-C(4)     | 122.22(13) |
| C(8)-C(7)-C(4)      | 118.50(13) |
| C(9)-C(8)-C(7)      | 119.97(15) |
| C(9)-C(8)-H(8)      | 120.0      |
| C(7)-C(8)-H(8)      | 120.0      |
| C(8)-C(9)-C(10)     | 120.52(16) |
| C(8)-C(9)-H(9)      | 119.7      |
| C(10)-C(9)-H(9)     | 119.7      |
| C(11)-C(10)-C(9)    | 119.68(15) |
| C(11)-C(10)-H(10)   | 120.2      |
| C(9)-C(10)-H(10)    | 120.2      |
| C(10)-C(11)-C(12)   | 120.13(16) |
| C(10)-C(11)-H(11)   | 119.9      |
| C(12)-C(11)-H(11)   | 119.9      |
| C(11)-C(12)-C(7)    | 120.43(15) |
| C(11)-C(12)-H(12)   | 119.8      |
| C(7)-C(12)-H(12)    | 119.8      |
| O(1)-C(13)-O(2)     | 125.19(14) |
| O(1)-C(13)-C(5)     | 123.07(13) |
| O(2)-C(13)-C(5)     | 111.73(12) |
| O(2)-C(14)-C(15)    | 110.07(14) |
| O(2)-C(14)-H(14A)   | 109.6      |
| C(15)-C(14)-H(14A)  | 109.6      |
| O(2)-C(14)-H(14B)   | 109.6      |
| C(15)-C(14)-H(14B)  | 109.6      |
| H(14A)-C(14)-H(14B) | 108.2      |
| C(14)-C(15)-H(15A)  | 109.5      |

|                     |            |
|---------------------|------------|
| C(14)-C(15)-H(15B)  | 109.5      |
| H(15A)-C(15)-H(15B) | 109.5      |
| C(14)-C(15)-H(15C)  | 109.5      |
| H(15A)-C(15)-H(15C) | 109.5      |
| H(15B)-C(15)-H(15C) | 109.5      |
| C(6)-C(16)-H(16A)   | 109.5      |
| C(6)-C(16)-H(16B)   | 109.5      |
| H(16A)-C(16)-H(16B) | 109.5      |
| C(6)-C(16)-H(16C)   | 109.5      |
| H(16A)-C(16)-H(16C) | 109.5      |
| H(16B)-C(16)-H(16C) | 109.5      |
| C(18)-C(17)-C(22)   | 119.55(13) |
| C(18)-C(17)-C(2)    | 117.20(13) |
| C(22)-C(17)-C(2)    | 123.14(13) |
| C(19)-C(18)-C(17)   | 121.10(14) |
| C(19)-C(18)-H(18)   | 119.5      |
| C(17)-C(18)-H(18)   | 119.5      |
| C(18)-C(19)-C(20)   | 119.50(14) |
| C(18)-C(19)-H(19)   | 120.3      |
| C(20)-C(19)-H(19)   | 120.3      |
| C(21)-C(20)-C(19)   | 120.01(14) |
| C(21)-C(20)-H(20)   | 120.0      |
| C(19)-C(20)-H(20)   | 120.0      |
| C(20)-C(21)-C(22)   | 121.34(14) |
| C(20)-C(21)-H(21)   | 119.3      |
| C(22)-C(21)-H(21)   | 119.3      |
| C(21)-C(22)-C(17)   | 118.48(13) |

|                   |            |
|-------------------|------------|
| C(21)-C(22)-C(23) | 118.37(13) |
| C(17)-C(22)-C(23) | 123.12(13) |
| C(28)-C(23)-C(24) | 119.07(14) |
| C(28)-C(23)-C(22) | 120.43(13) |
| C(24)-C(23)-C(22) | 120.41(13) |
| C(25)-C(24)-C(23) | 120.26(14) |
| C(25)-C(24)-H(24) | 119.9      |
| C(23)-C(24)-H(24) | 119.9      |
| C(26)-C(25)-C(24) | 120.11(15) |
| C(26)-C(25)-H(25) | 119.9      |
| C(24)-C(25)-H(25) | 119.9      |
| C(25)-C(26)-C(27) | 120.06(15) |
| C(25)-C(26)-H(26) | 120.0      |
| C(27)-C(26)-H(26) | 120.0      |
| C(28)-C(27)-C(26) | 119.96(15) |
| C(28)-C(27)-H(27) | 120.0      |
| C(26)-C(27)-H(27) | 120.0      |
| C(27)-C(28)-C(23) | 120.53(14) |
| C(27)-C(28)-H(28) | 119.7      |
| C(23)-C(28)-H(28) | 119.7      |
| C(6)-N(1)-C(2)    | 116.54(12) |
| C(2)-N(3)-C(4)    | 117.27(12) |
| C(13)-O(2)-C(14)  | 115.96(12) |

---

\* Atom numbering corresponds to the deposited crystal structure numbering.
